# Supplementary material for: High-resolution mapping of heteroduplex DNA formed during UV-induced and spontaneous mitotic recombination events in yeast
Source: PubMed Central journal article supplement (PMC5531827; doi:10.7554/elife.28069), 2017-07-17
Supplement: elife-28069-supp2.pdf [file elife-28069-supp2.pdf]

S1

A. Class 1, NCO

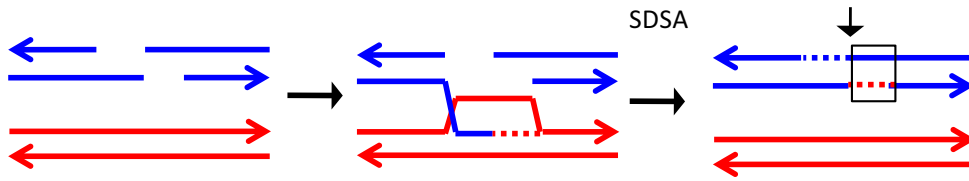

B. Class 2, NCO, mechanism 1

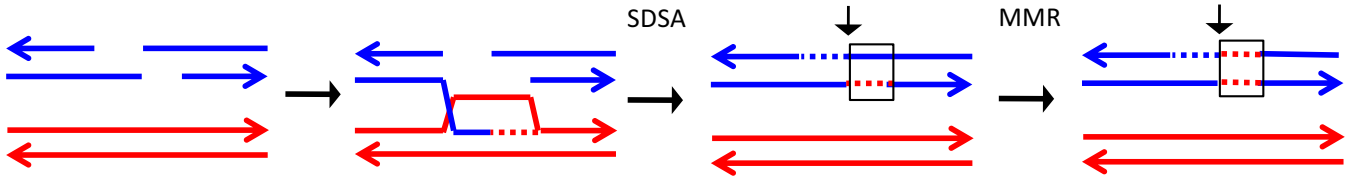

C. Class 2, NCO, mechanism 2

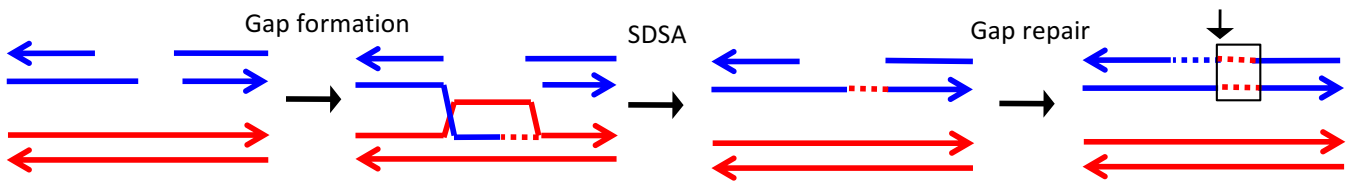

D. Class 3, NCO, mechanism 1

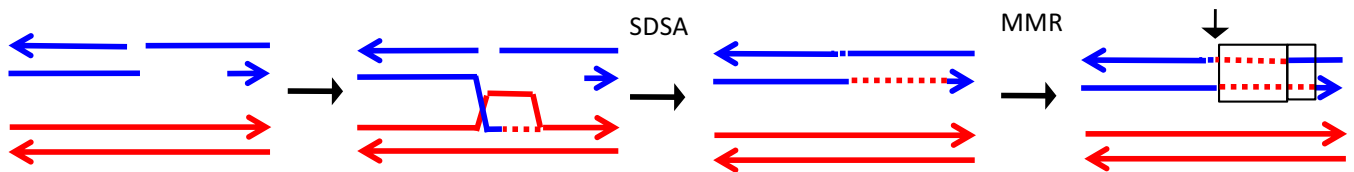

E. Class 3, NCO, mechanism 2

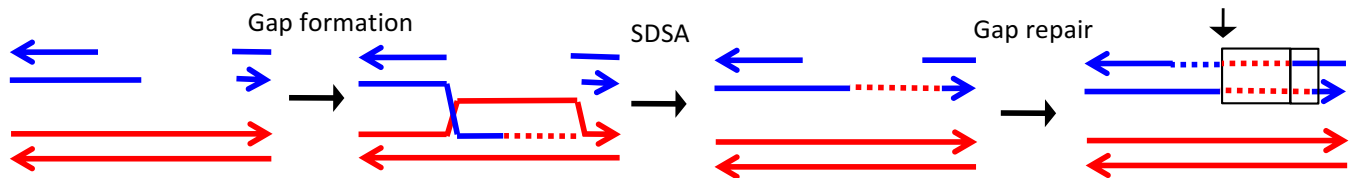

F. Class 4, CO

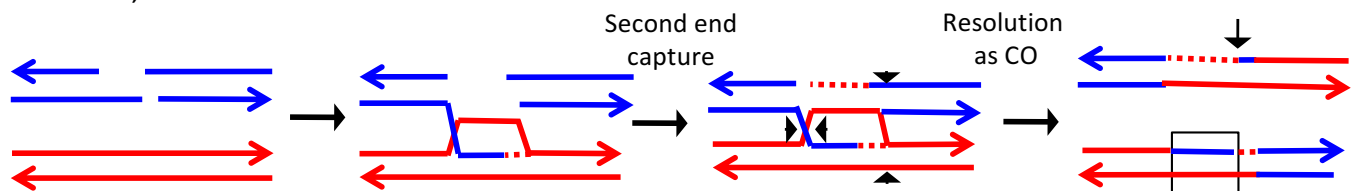

S2

A. Class 5, NCO

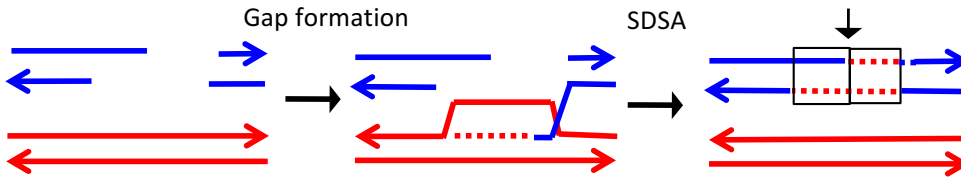

B. Class 6, CO

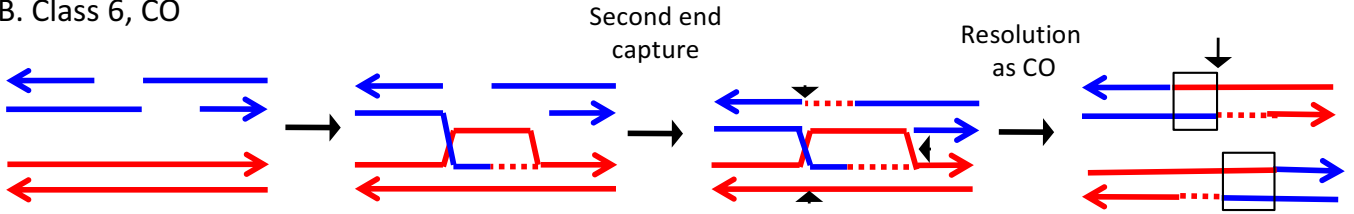

C. Class 7, CO

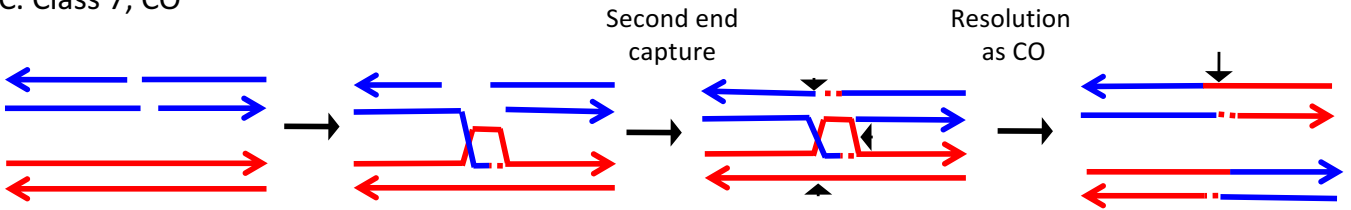

D. Class 8, NCO, mechanism 1

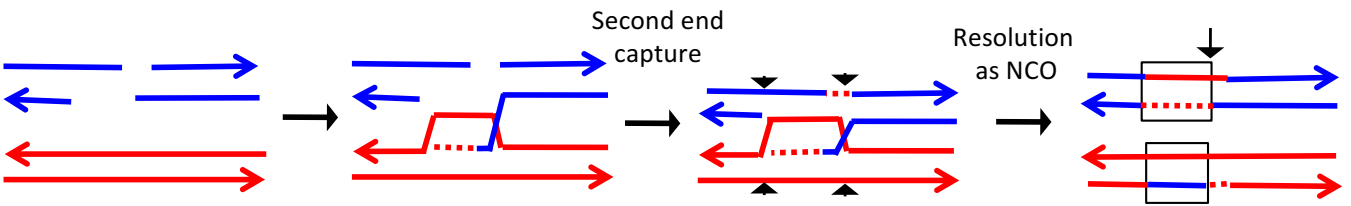

E. Class 8, NCO, mechanism 2

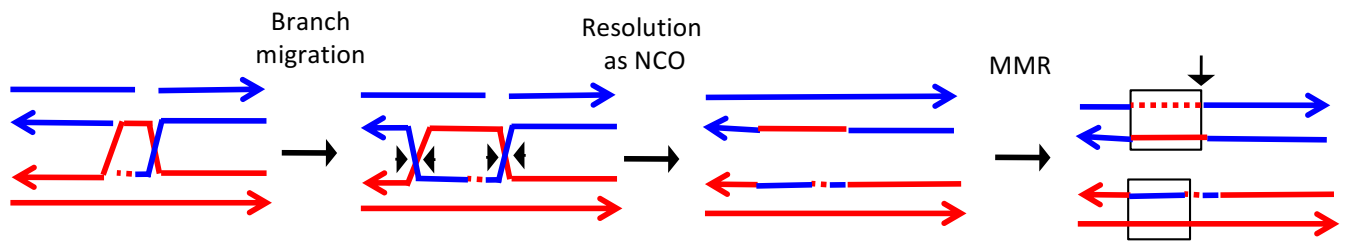

S3

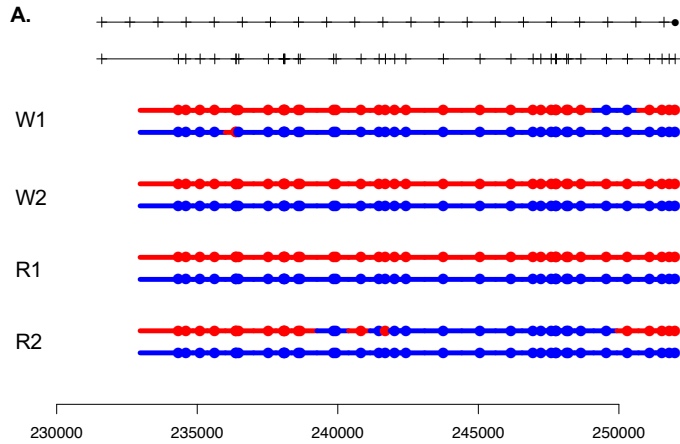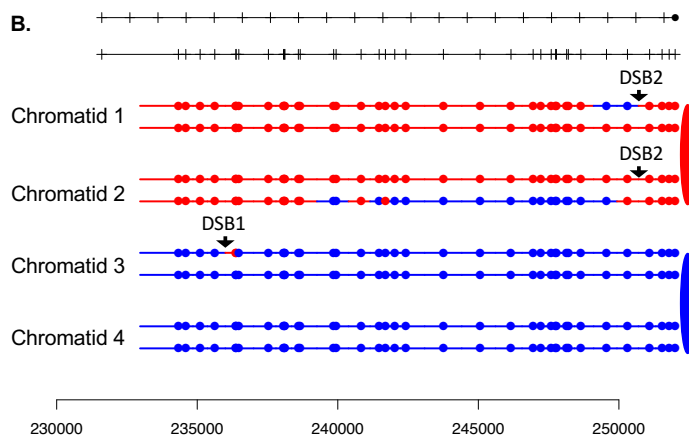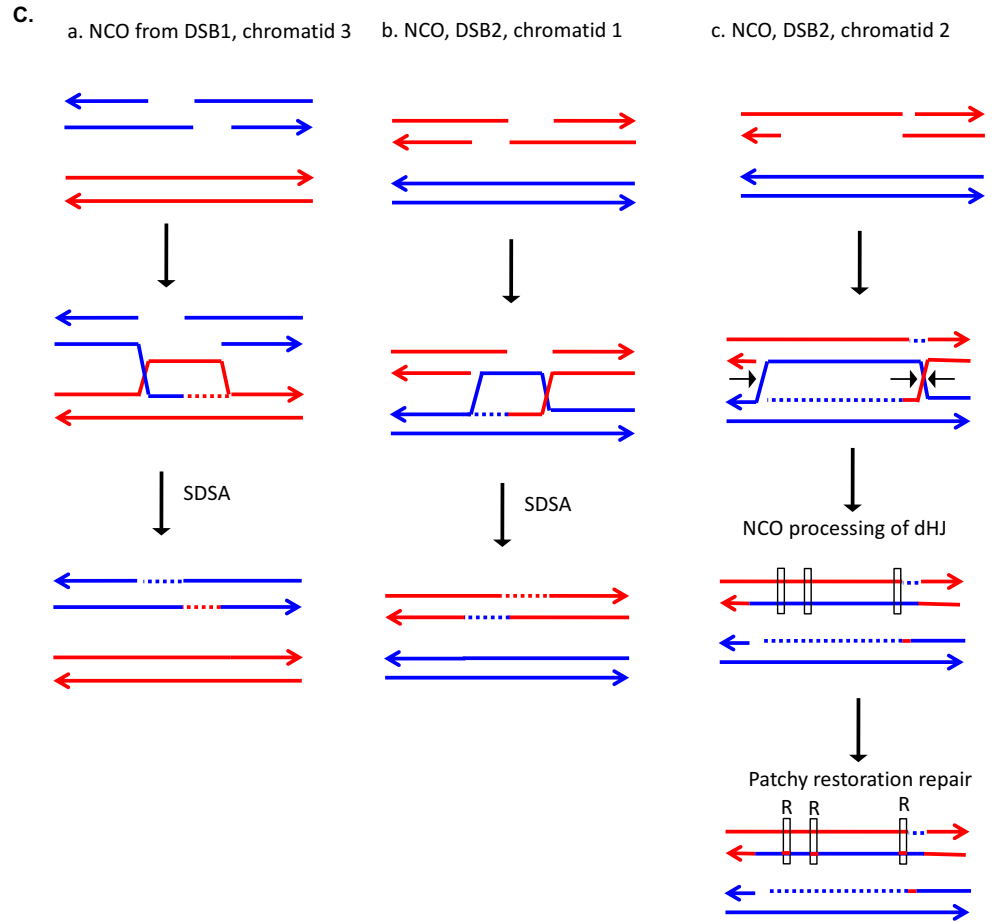

|    |      |                                                                     |                                                                        |
|----|------|---------------------------------------------------------------------|------------------------------------------------------------------------|
| S3 | NCO1 | Simple heteroduplex. DSB on blue chromatid.                         | SDSA                                                                   |
|    | NCO2 | Simple heteroduplex. DSB on red chromatid.                          | SDSA                                                                   |
|    | NCO3 | Long heteroduplex with regions of homoduplex. DSB on red chromatid. | Standard DSBR event except Mlh1-independent MMR. Two independent DSBs. |

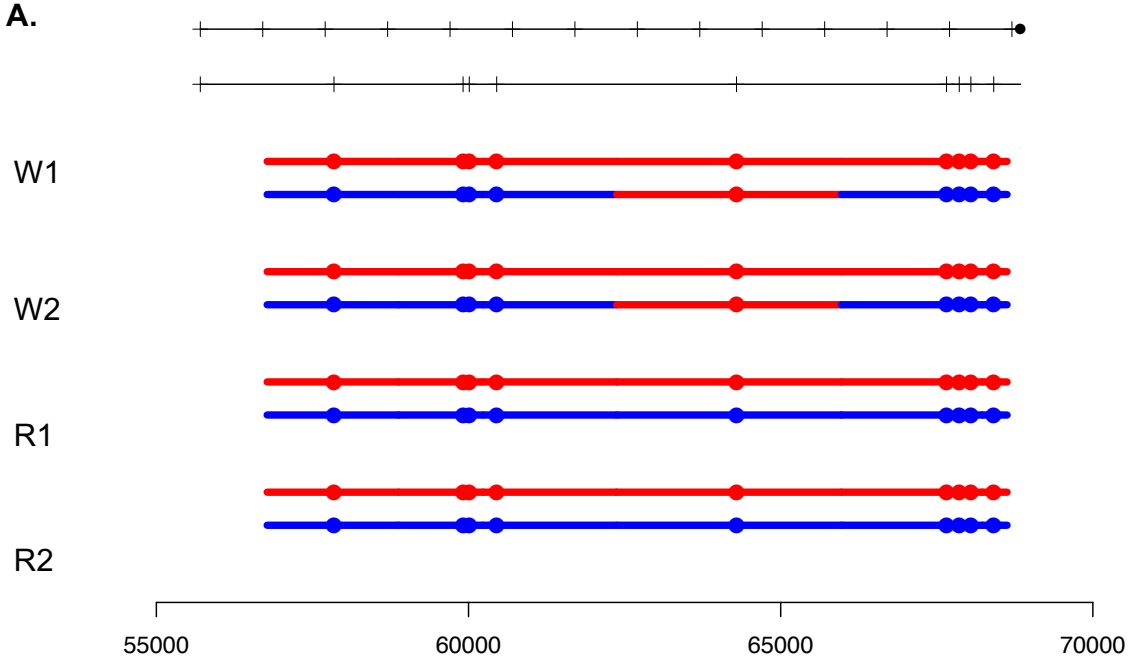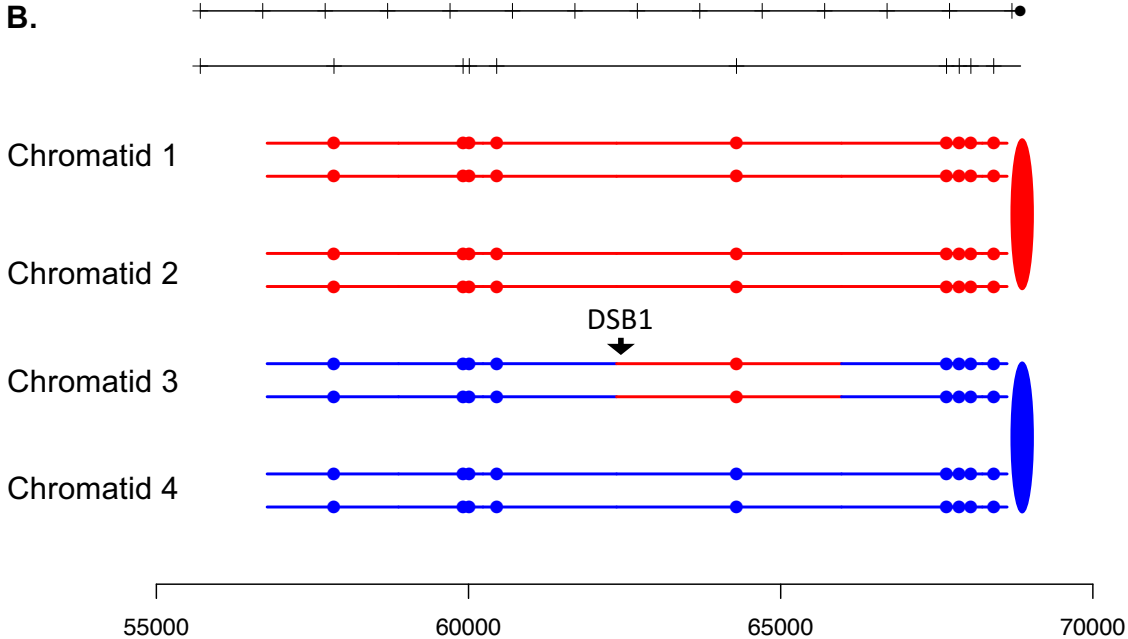

S5

A.

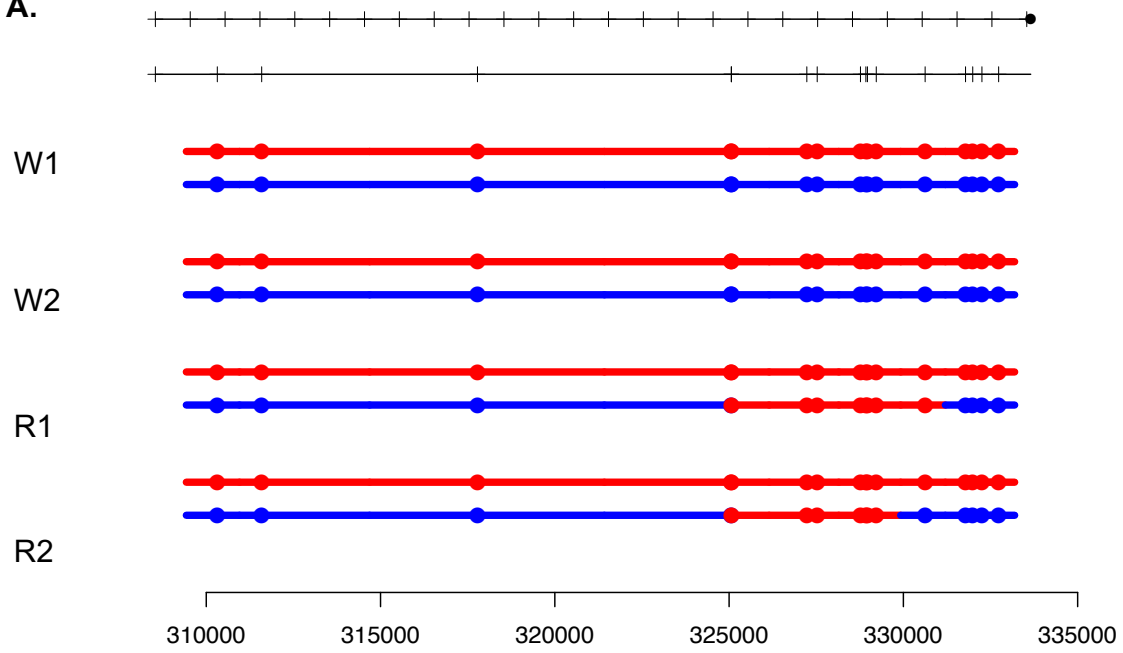

B.

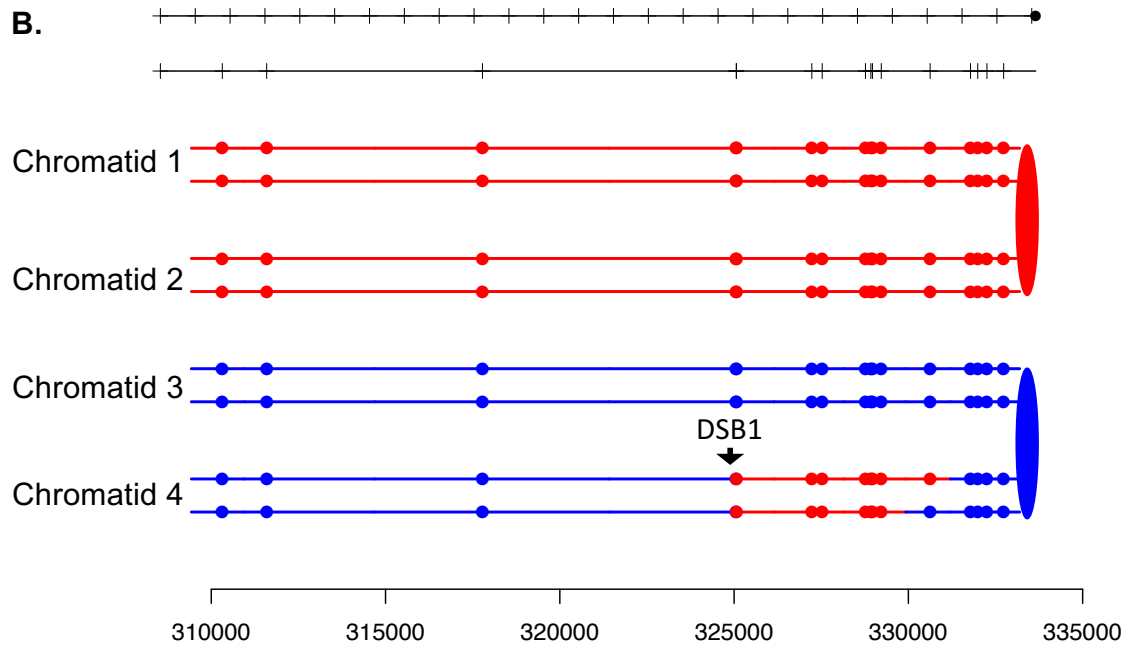

A.

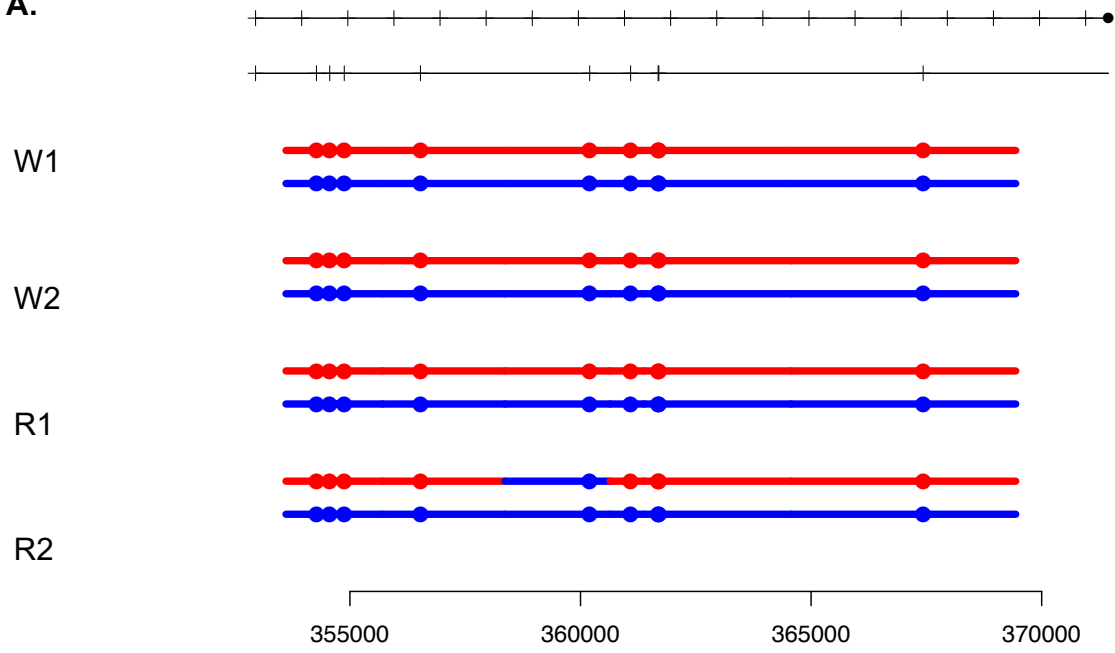

B.

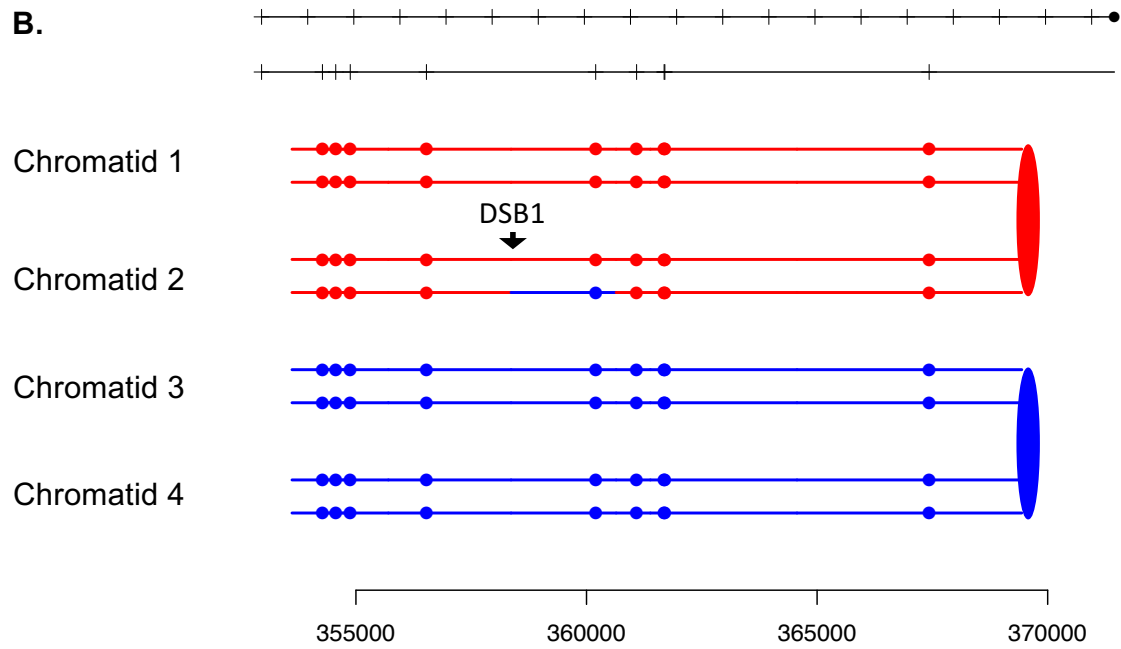

S7

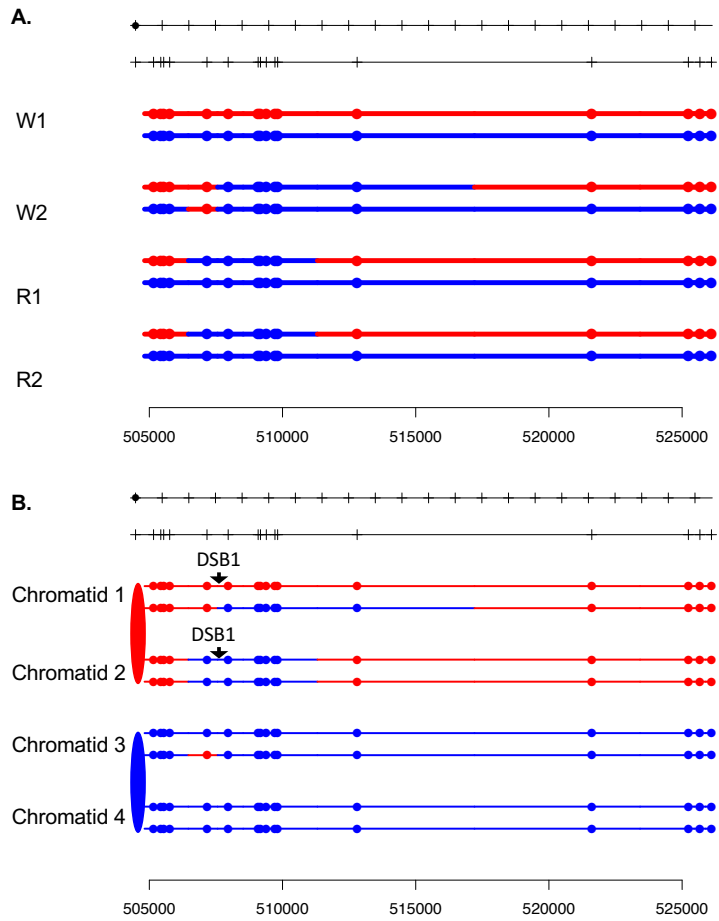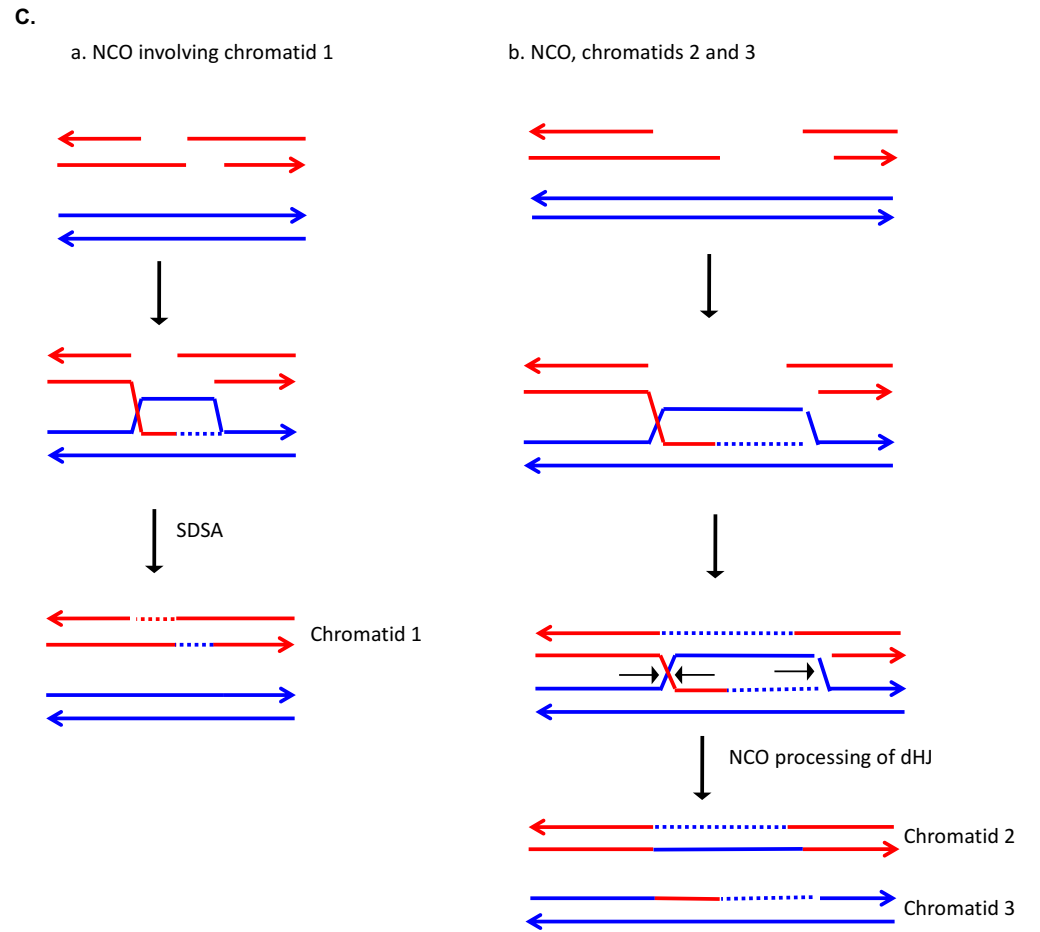

|    |      |                                                                                           |                                   |
|----|------|-------------------------------------------------------------------------------------------|-----------------------------------|
| S7 | NCO1 | Simple heteroduplex on chromatid 1                                                        | SDSA                              |
|    | NCO2 | Large homoduplex region separating DSB site from heteroduplex tract (chromatids 2 and 3). | Repair of double-stranded DNA gap |

S8

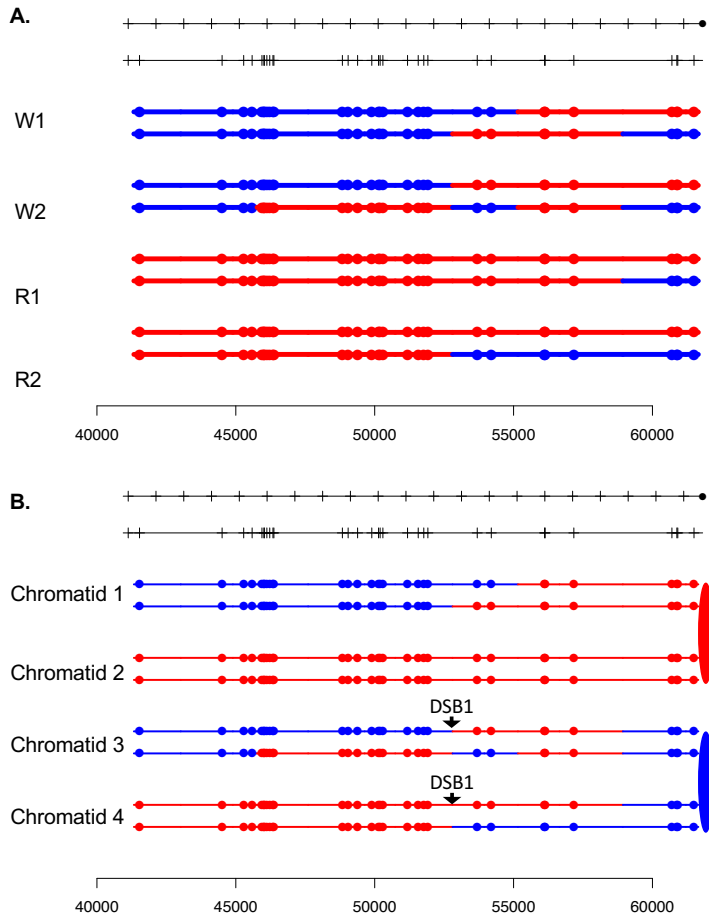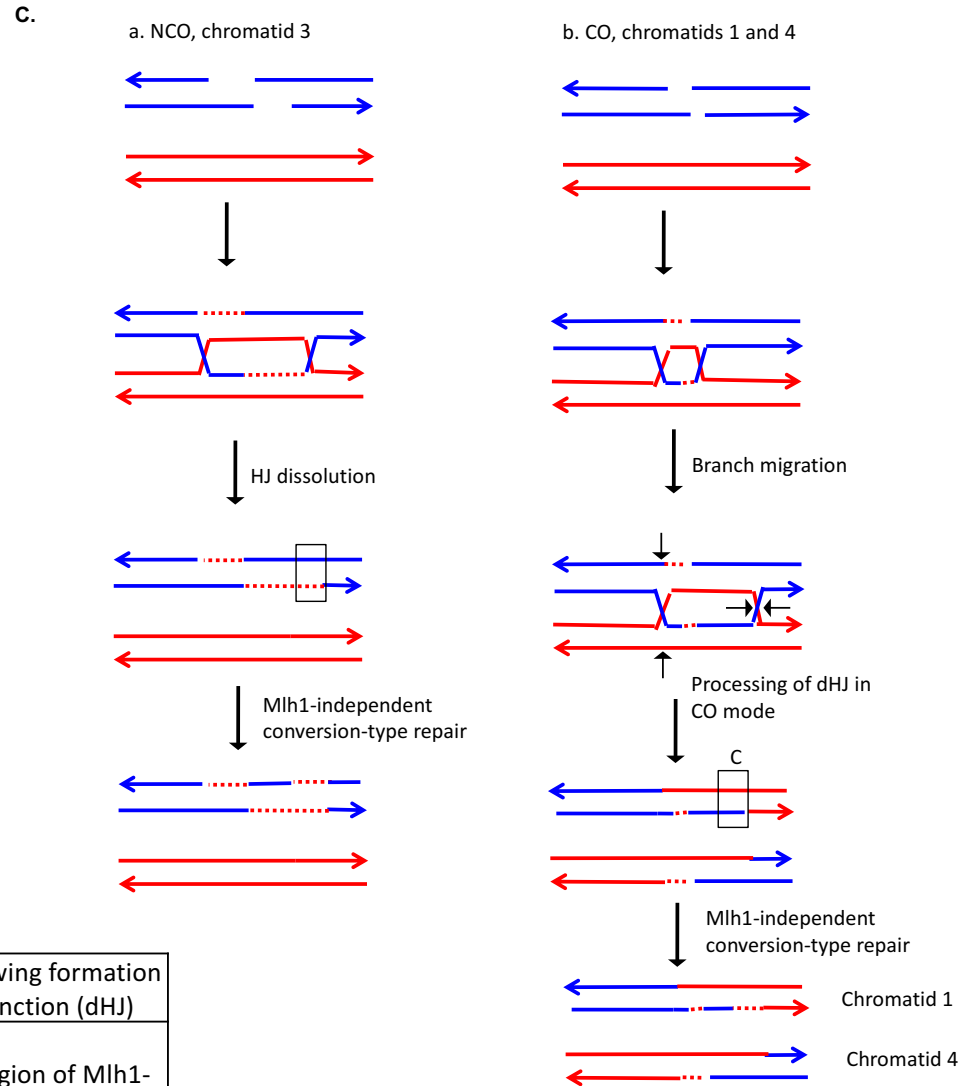

|    |     |                                                                                                      |                                                                        |
|----|-----|------------------------------------------------------------------------------------------------------|------------------------------------------------------------------------|
| S8 | CO  | Symmetric heteroduplexes                                                                             | Branch migration following formation of double Holliday junction (dHJ) |
|    | NCO | Strand switches of heteroduplexes on NCO chromatid, region of conversion at junction of heteroduplex | dHJ dissolution and region of Mlh1-independent MMR                     |



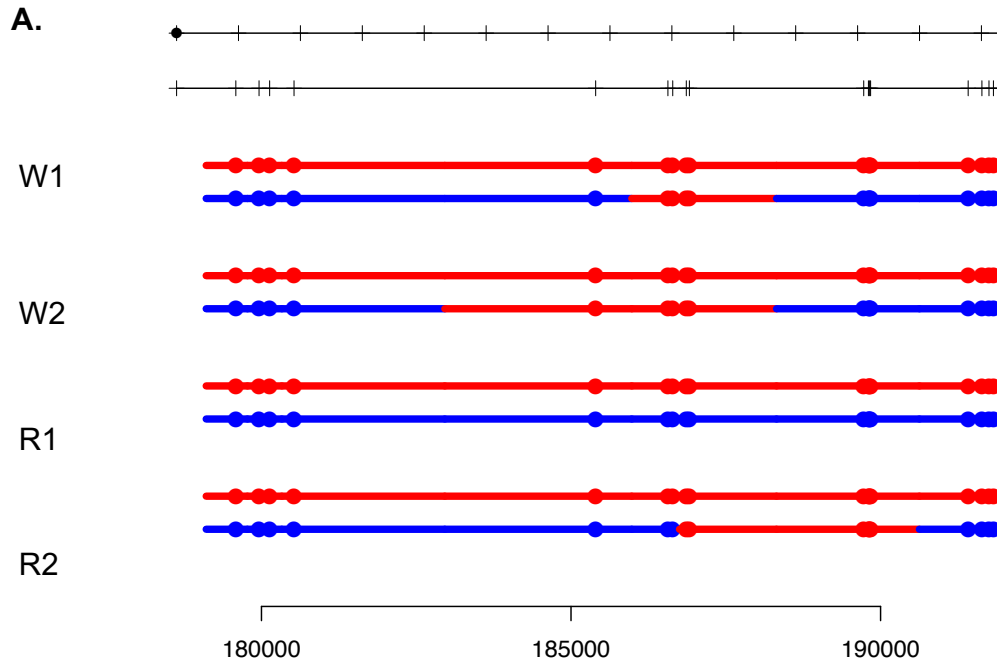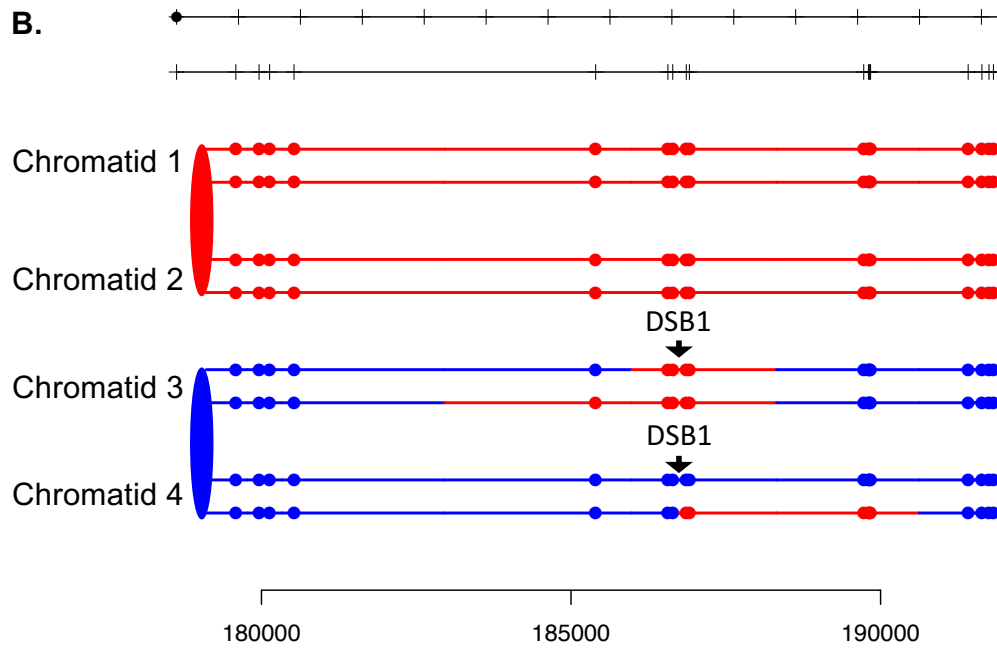

S10

**A.**

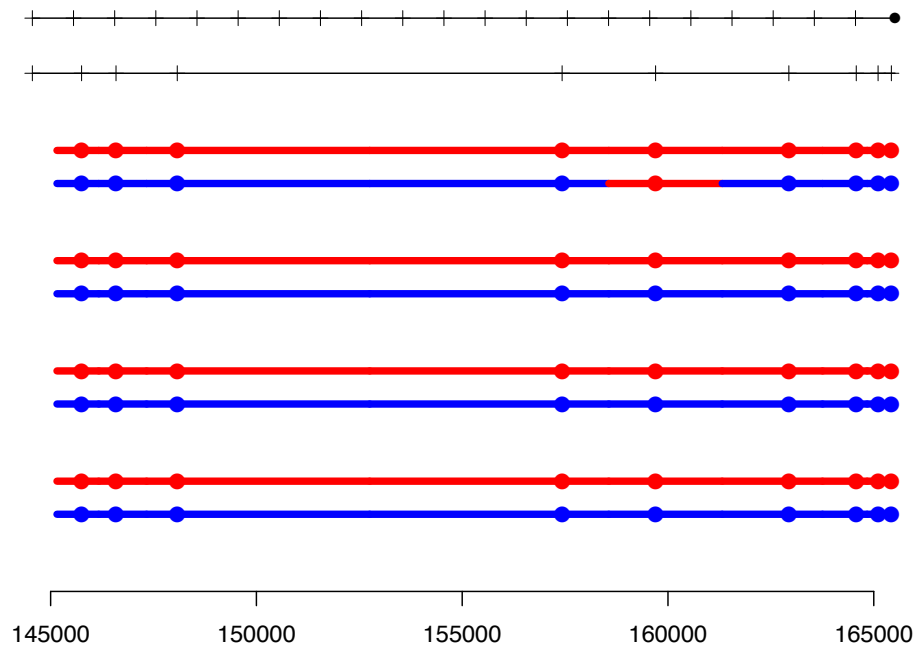

**B.**

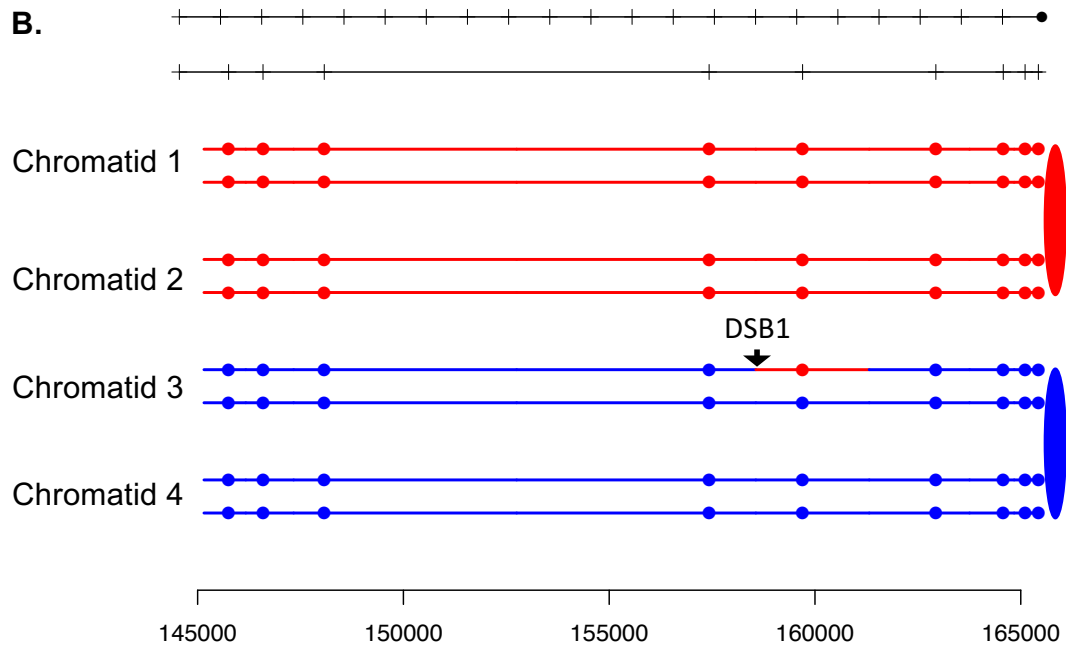

S11

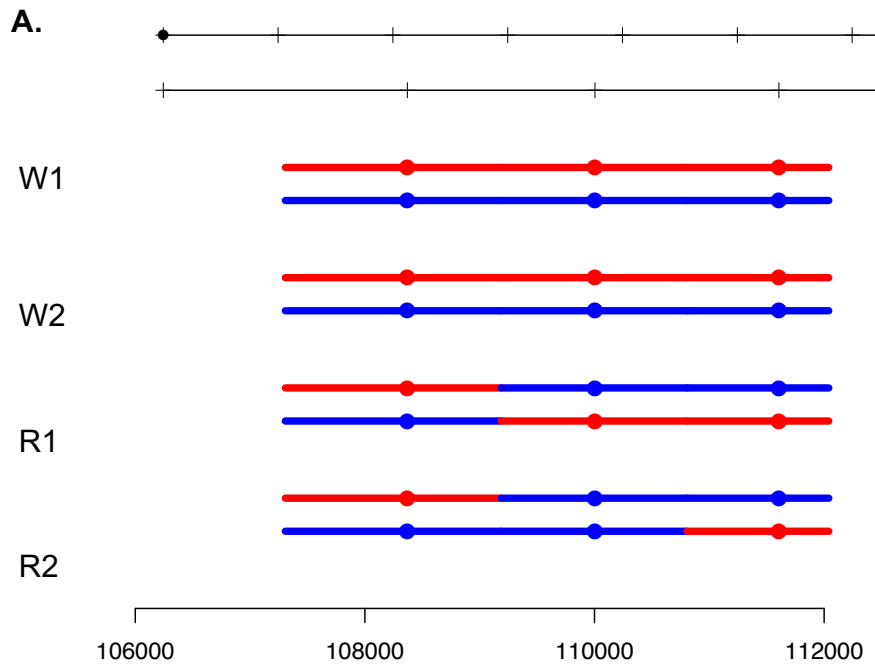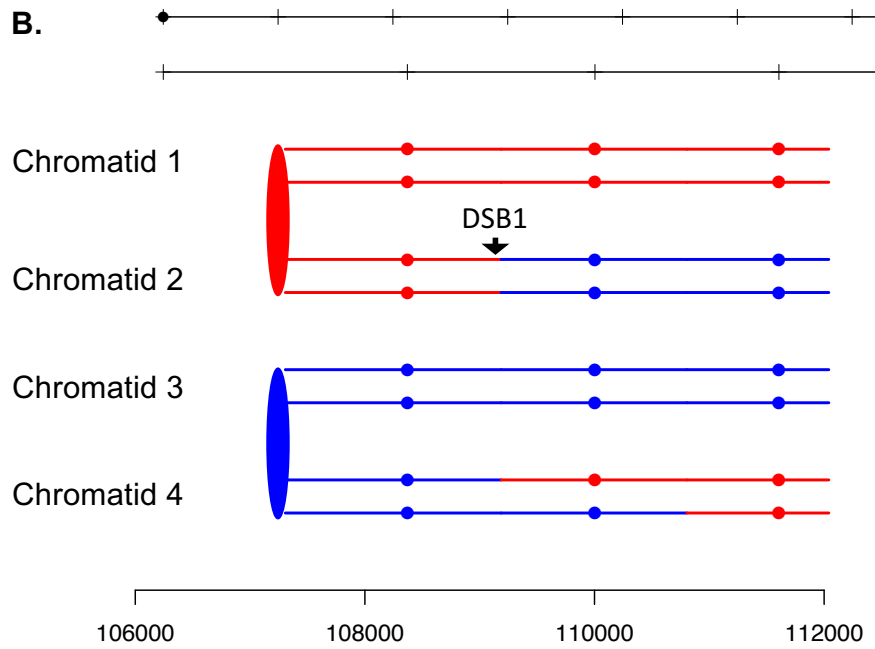

A.

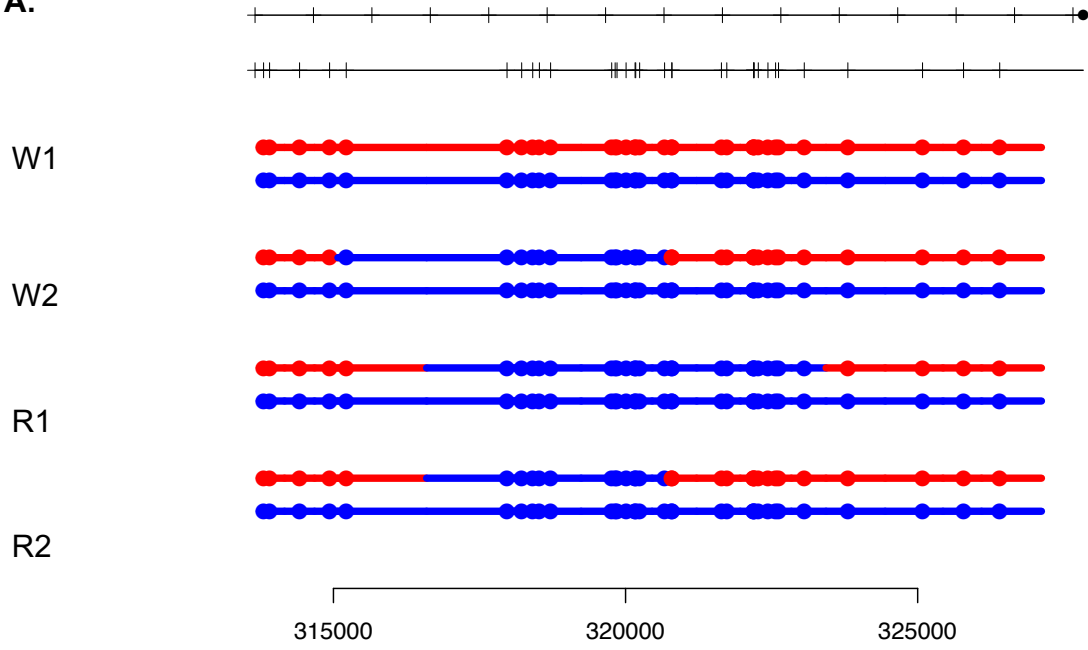

B.

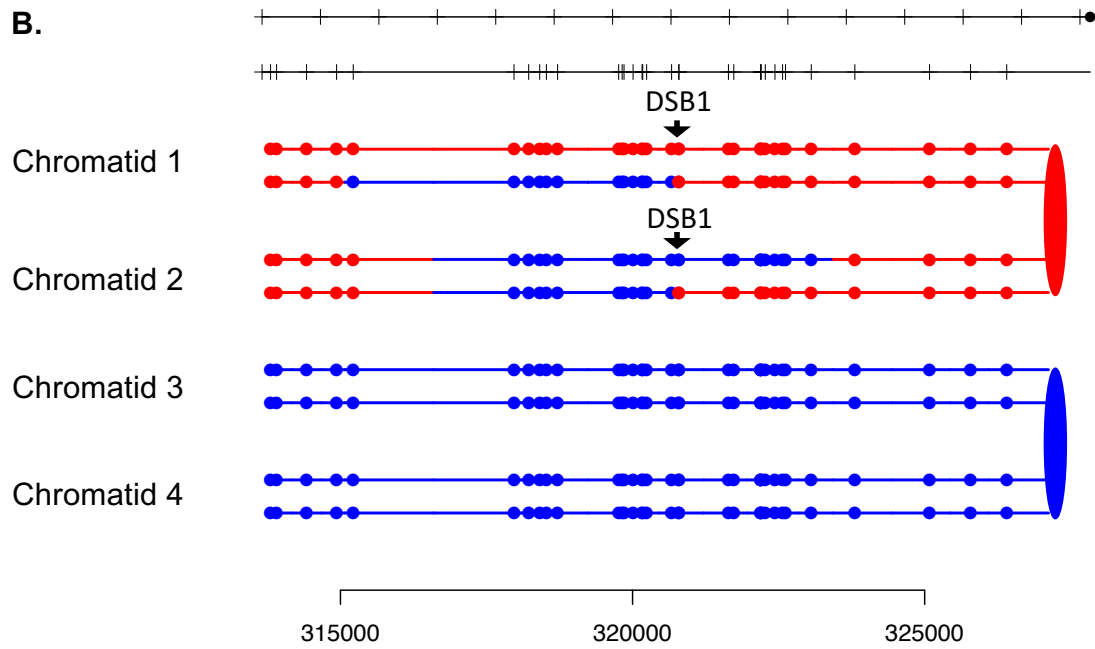

S13

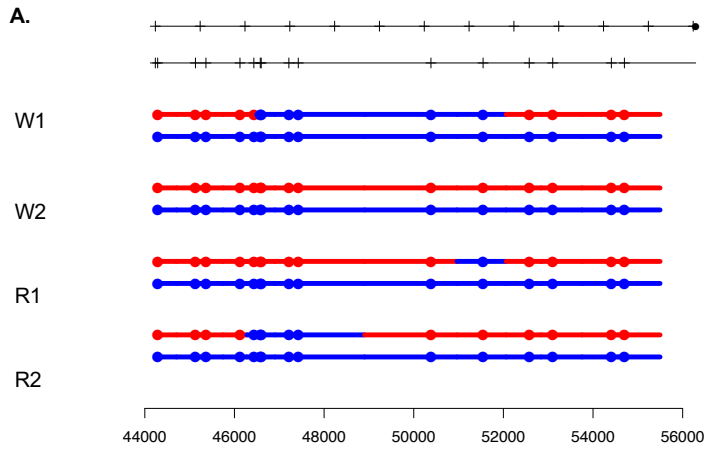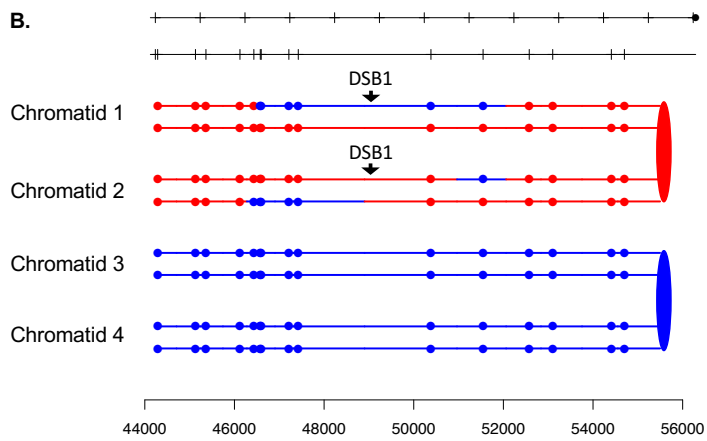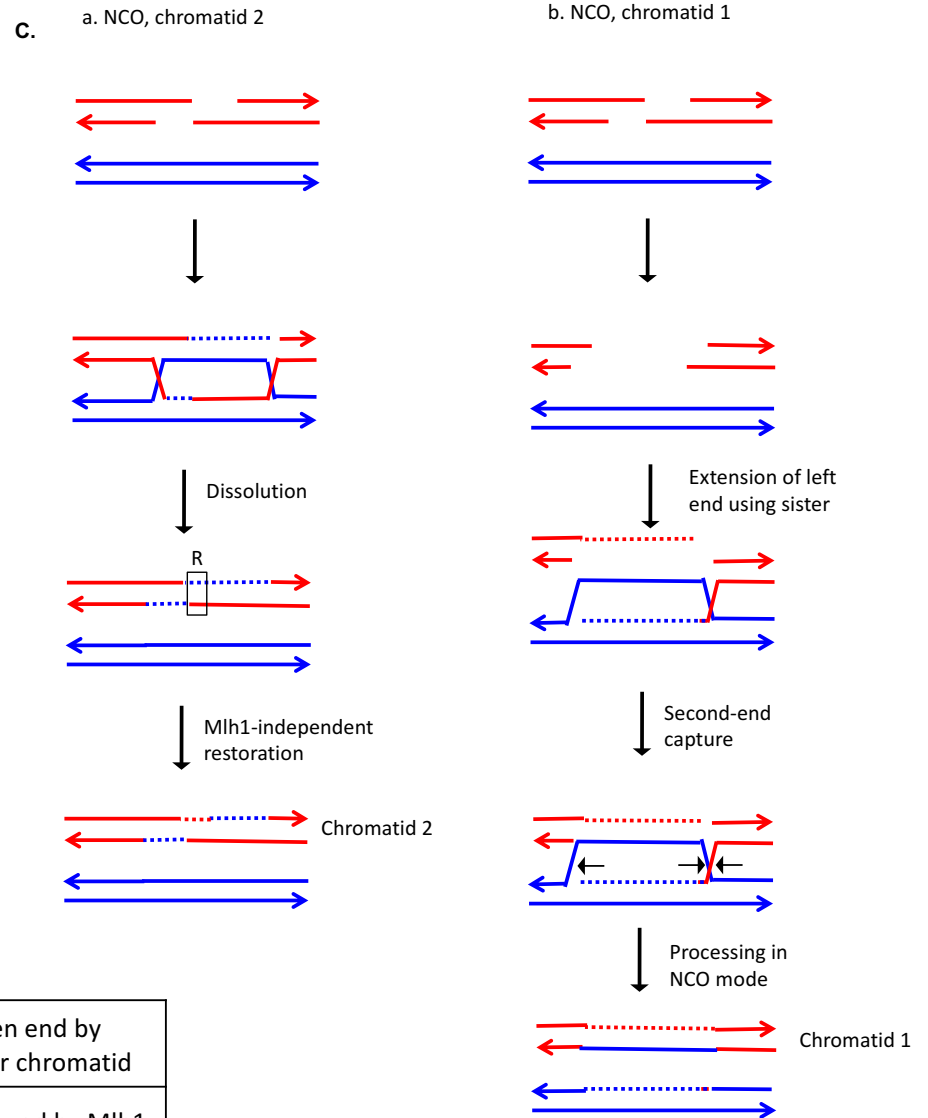

|     |      |                                                                |                                                              |
|-----|------|----------------------------------------------------------------|--------------------------------------------------------------|
| S13 | NCO1 | Heteroduplex spanning DSB site in chromatid 1                  | Extension of broken end by interaction with sister chromatid |
|     | NCO2 | Heteroduplexes in trans on chromatid 2 separated by homoduplex | Dissolution of dHJ followed by Mlh1-independent MMR          |

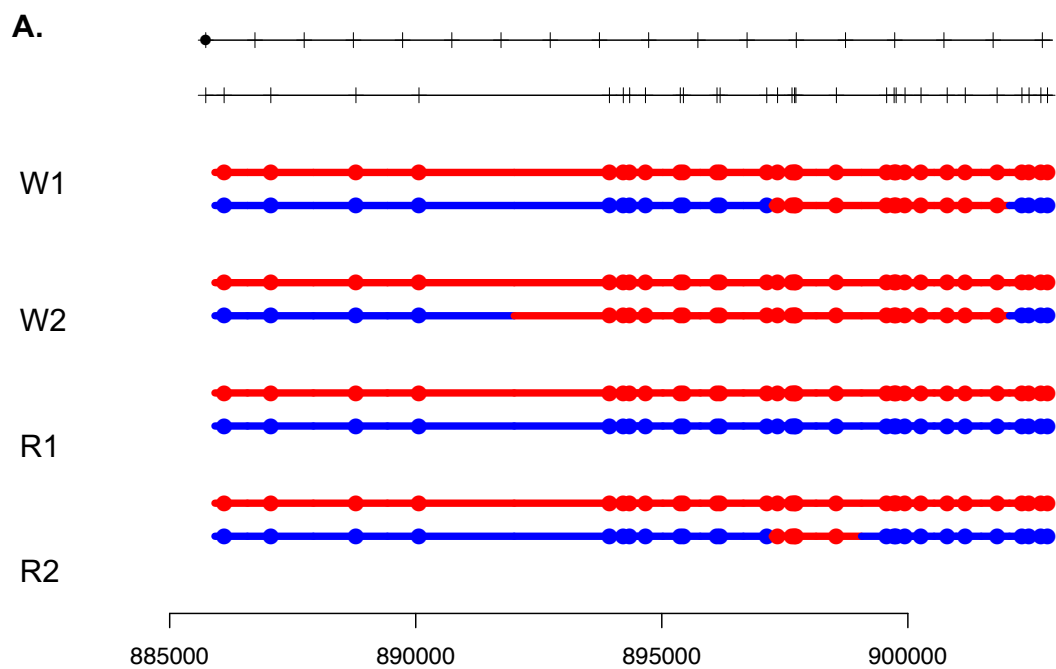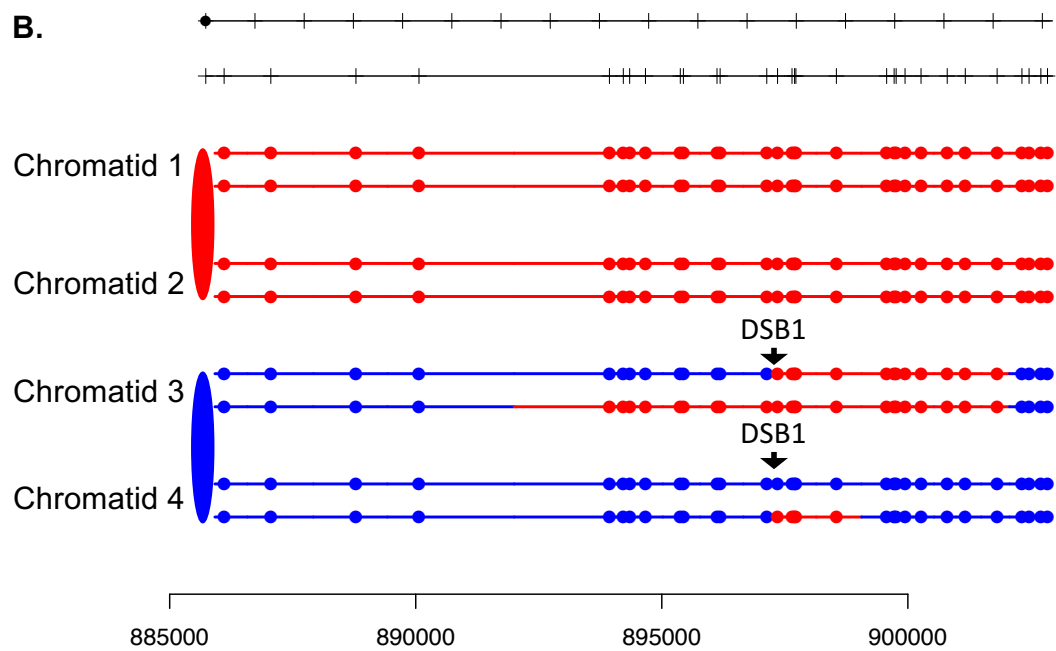

S15

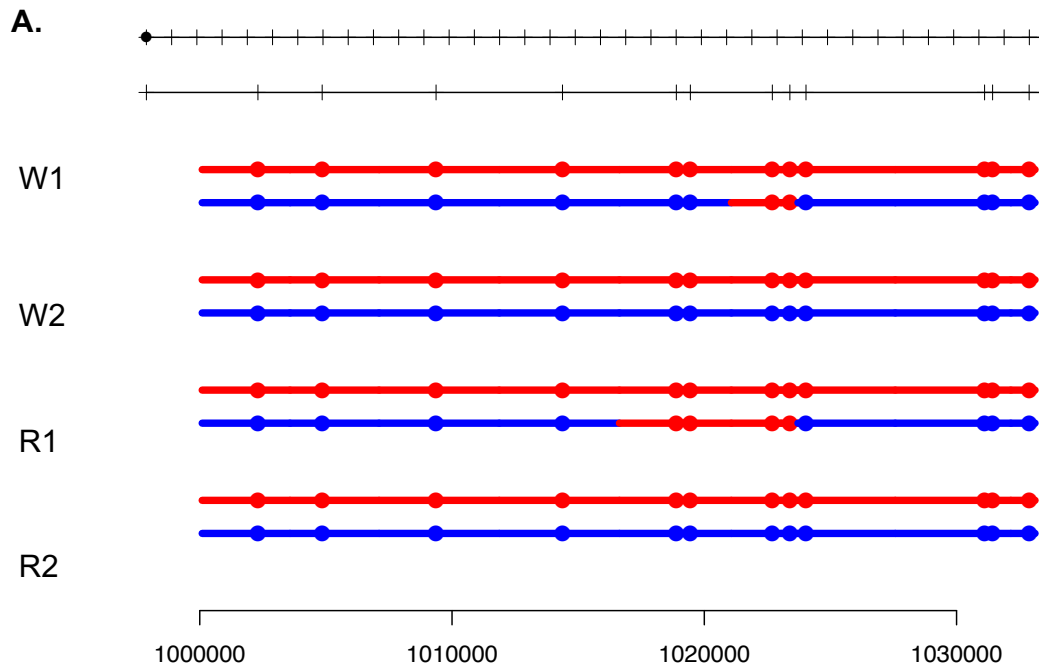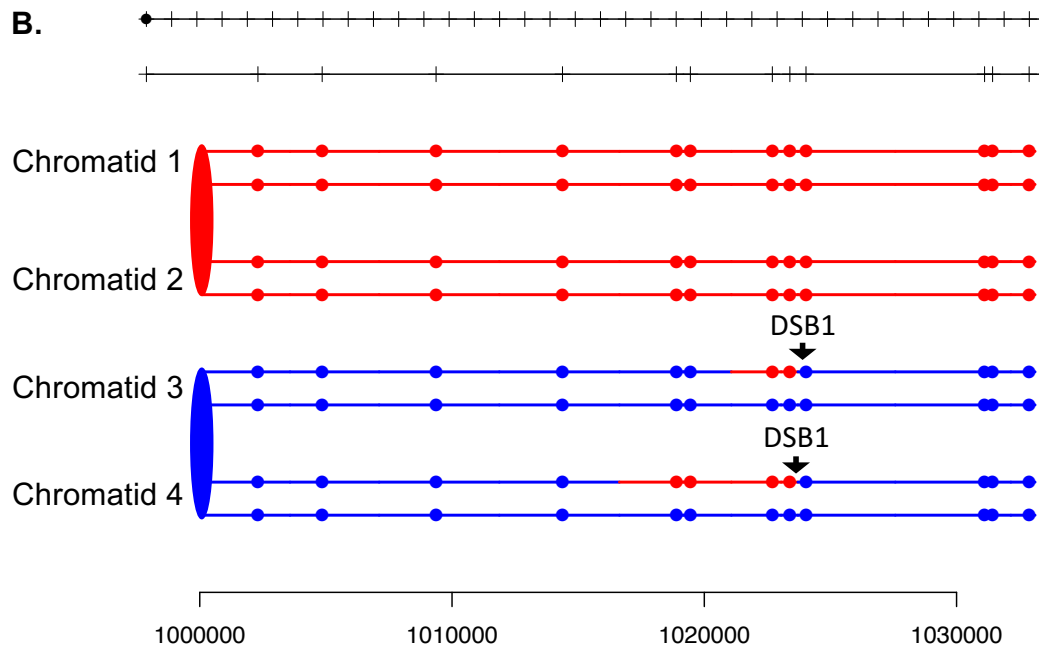

S16

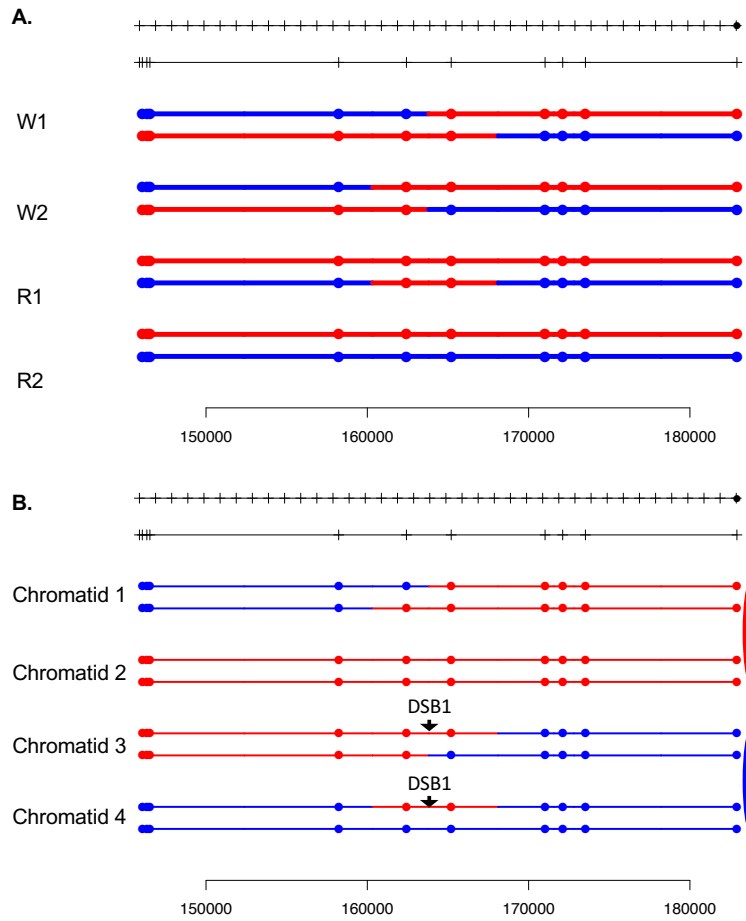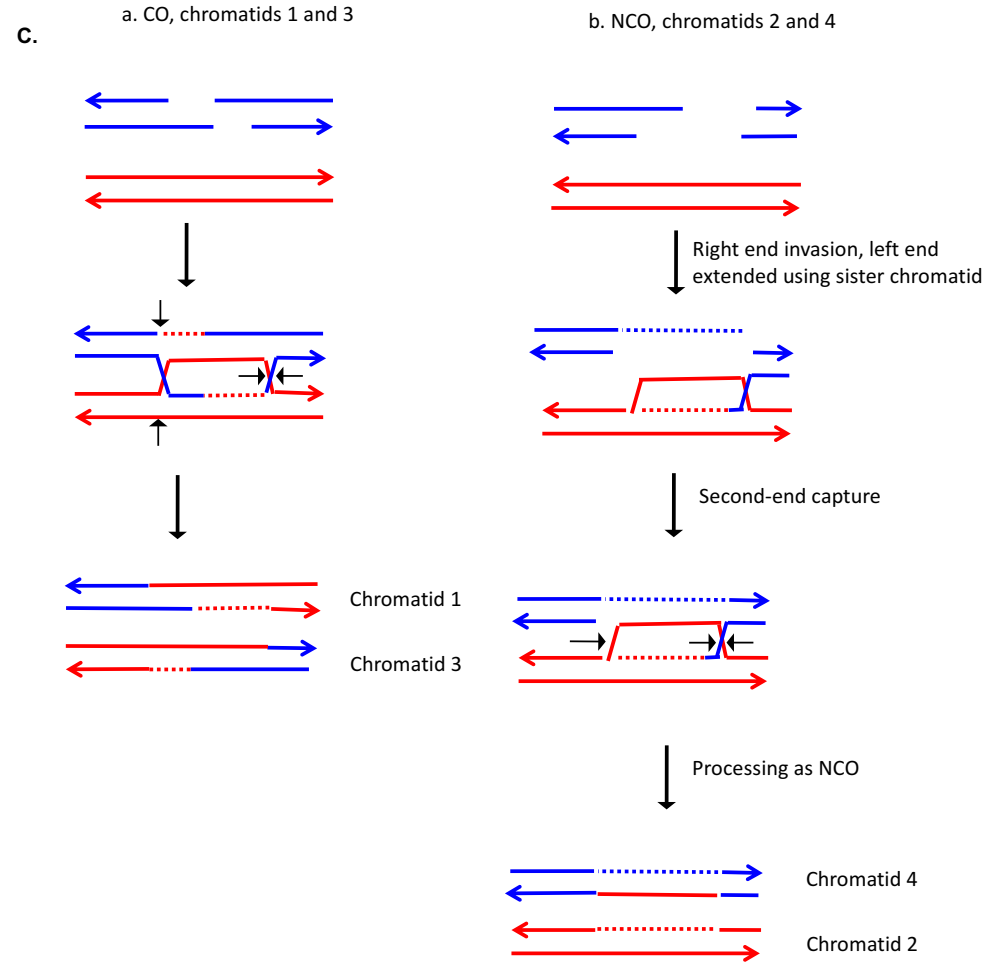

|     |     |                                                   |                                                              |
|-----|-----|---------------------------------------------------|--------------------------------------------------------------|
| S16 | CO  | Heteroduplexes in <i>trans</i> flanking DSB site  | Standard CO according to DSBR model                          |
|     | NCO | Heteroduplex spanning DSB site on NCO chromatid 4 | Extension of broken end by interaction with sister chromatid |



S17

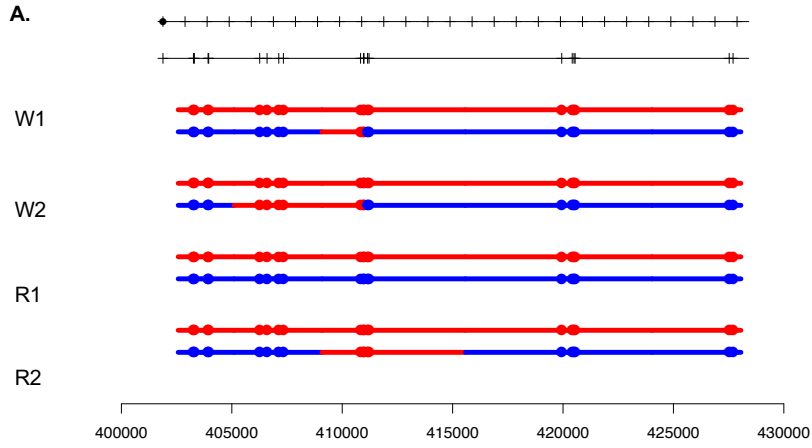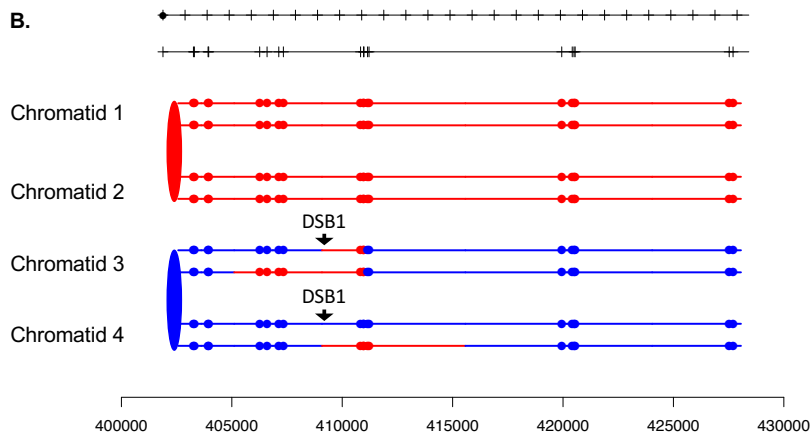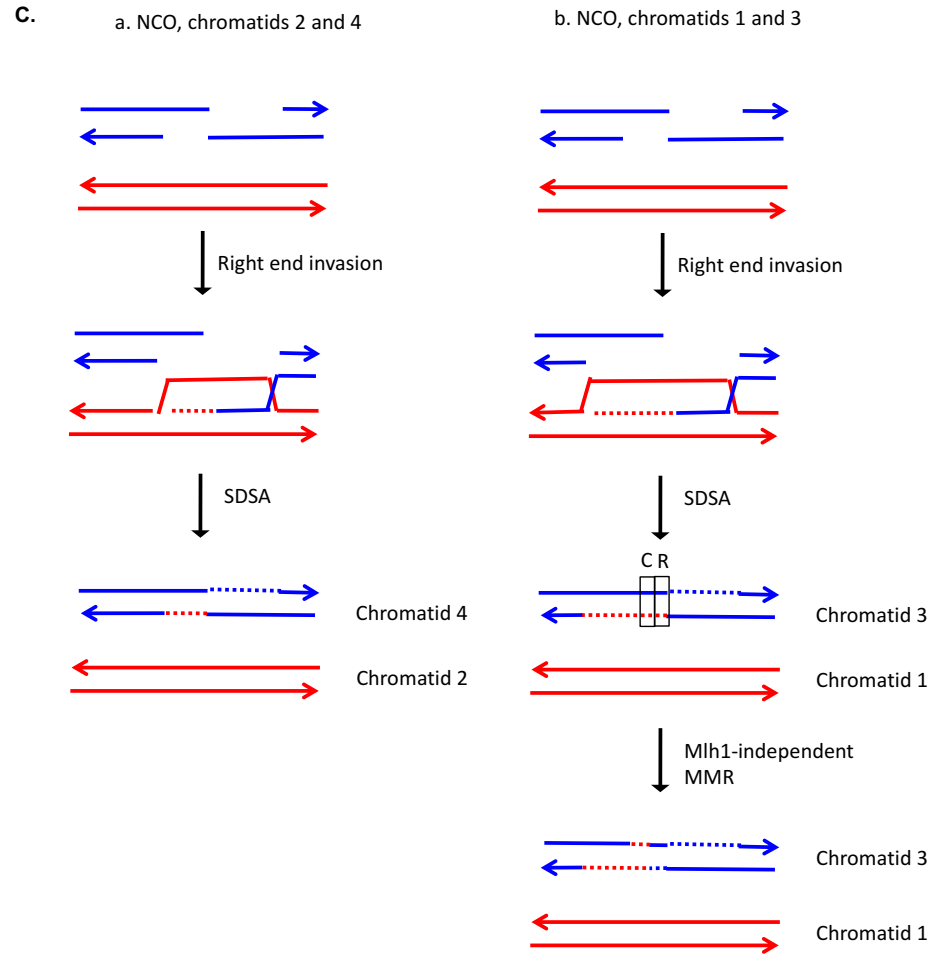

|     |      |                                                                                |                                |
|-----|------|--------------------------------------------------------------------------------|--------------------------------|
| S17 | NCO1 | Heteroduplex with interspersed conversion and restoration tracts (chromatid 3) | SDSA with Mlh1-independent MMR |
|     | NCO2 | Simple heteroduplex (chromatid 4)                                              | SDSA                           |

S18

A.

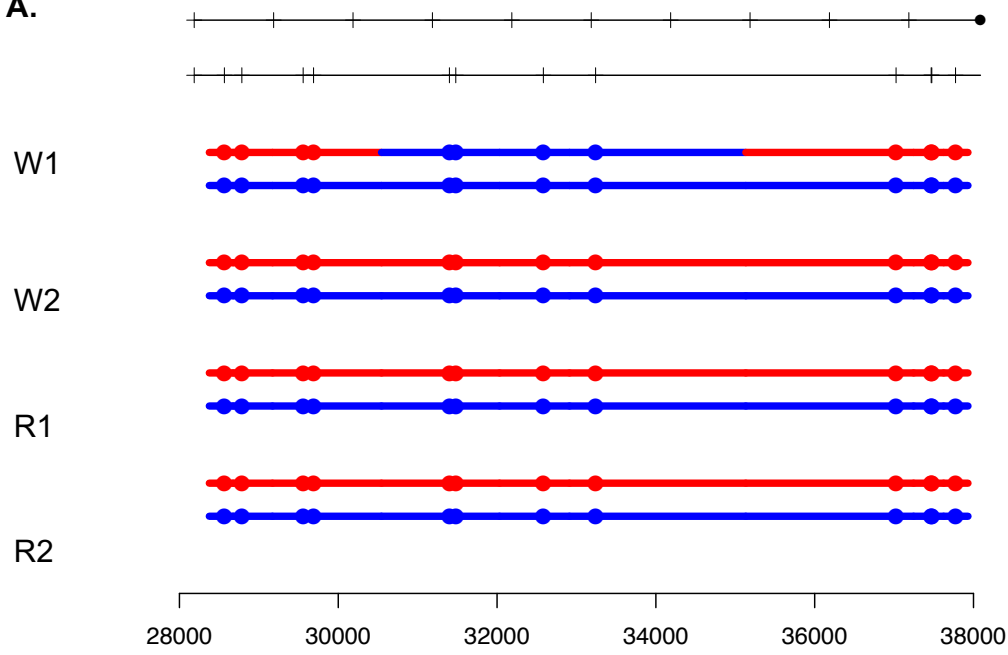

B.

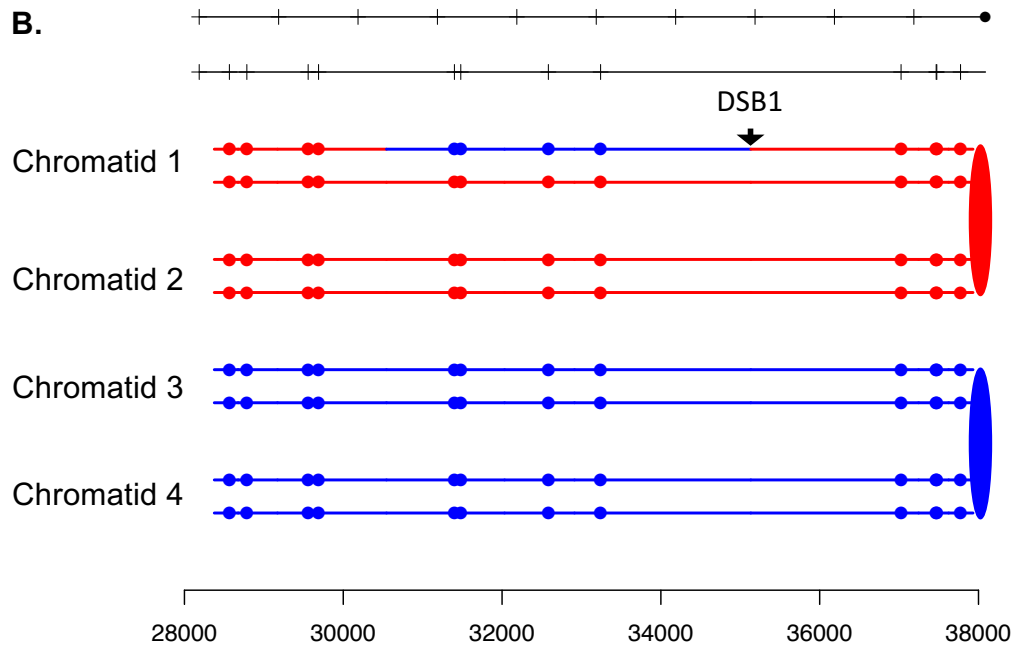

S19

A.

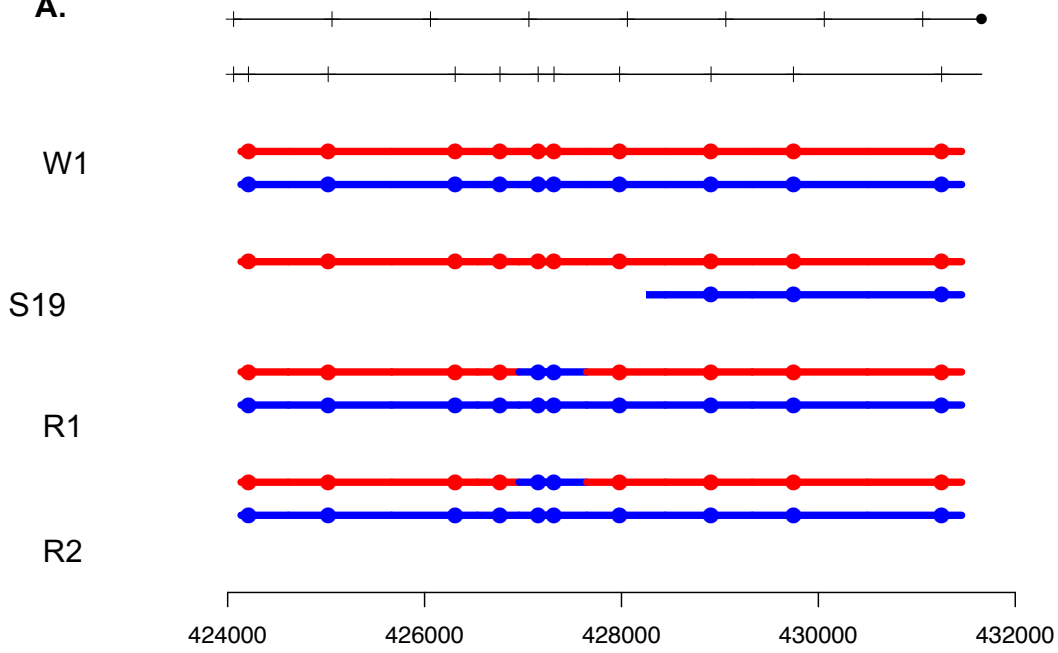

B.

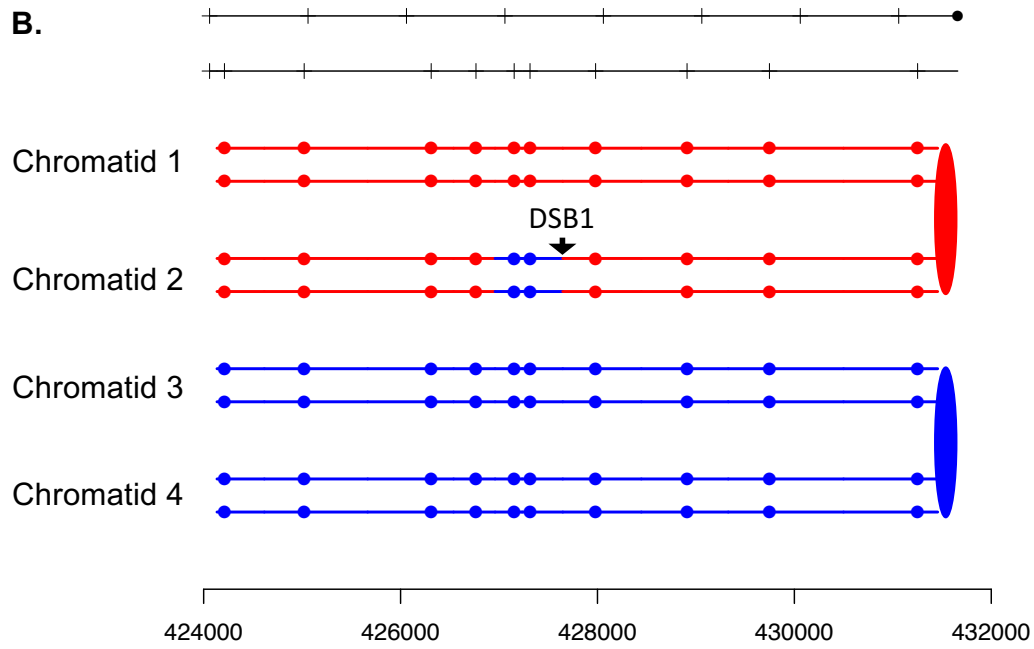

A.

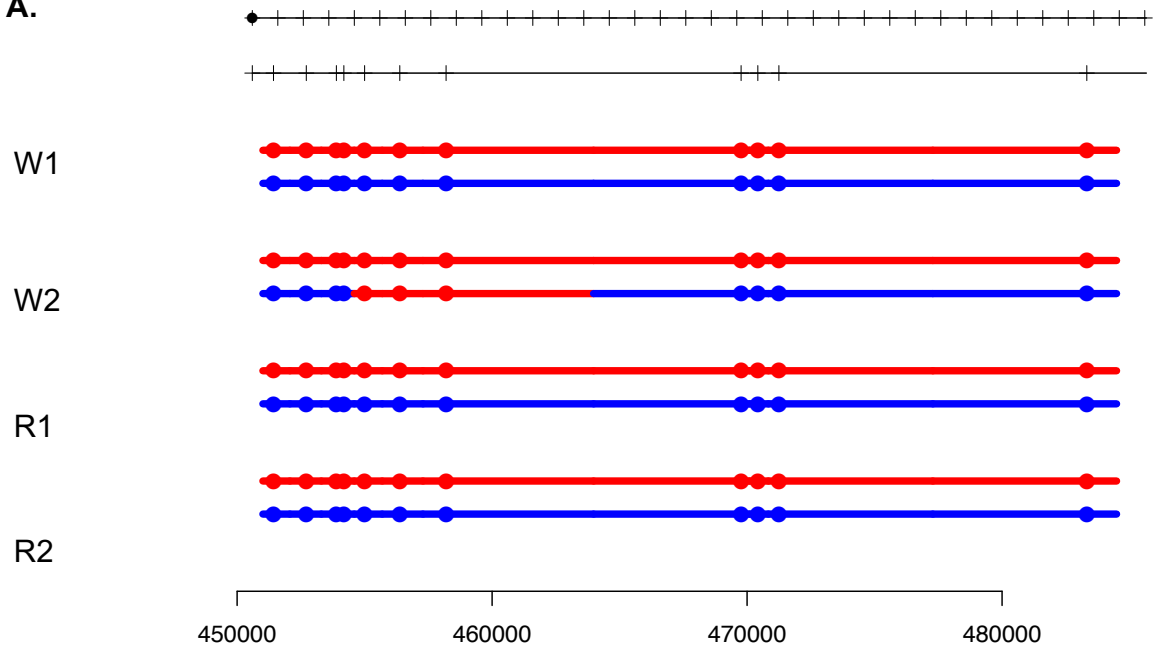

B.

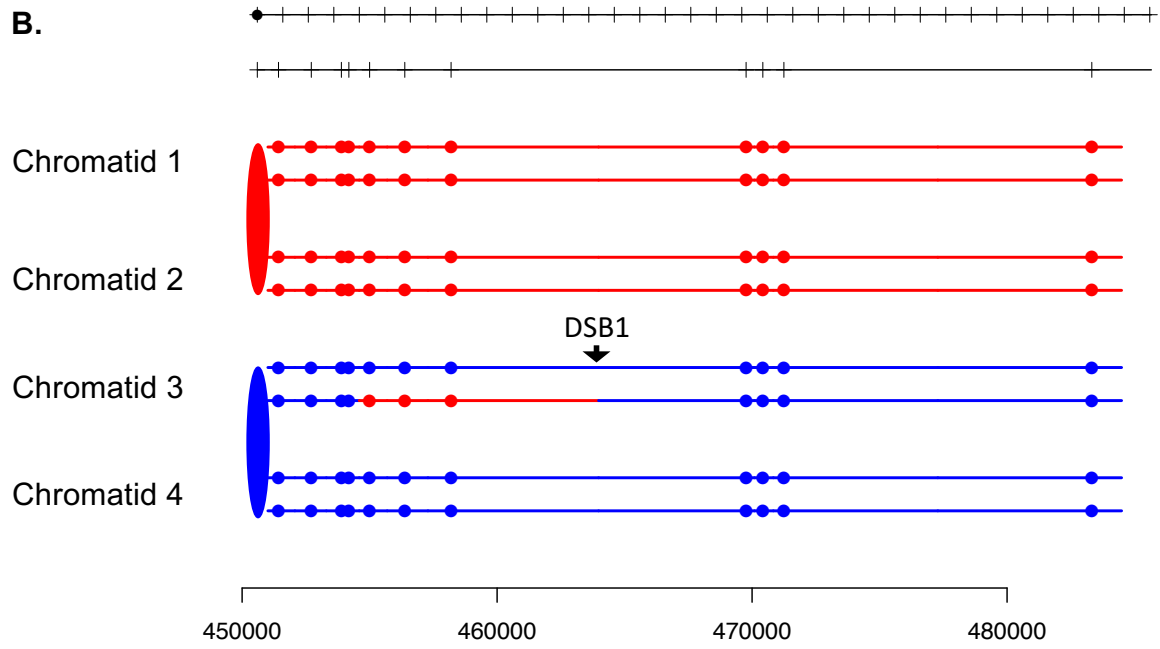

S21

A.

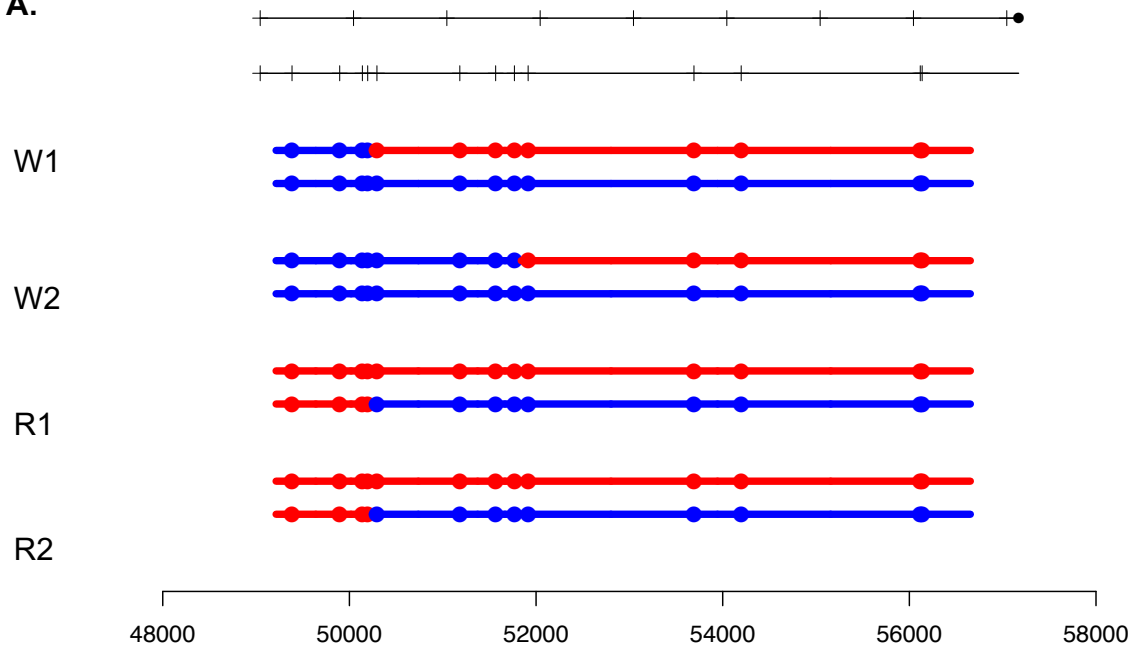

B.

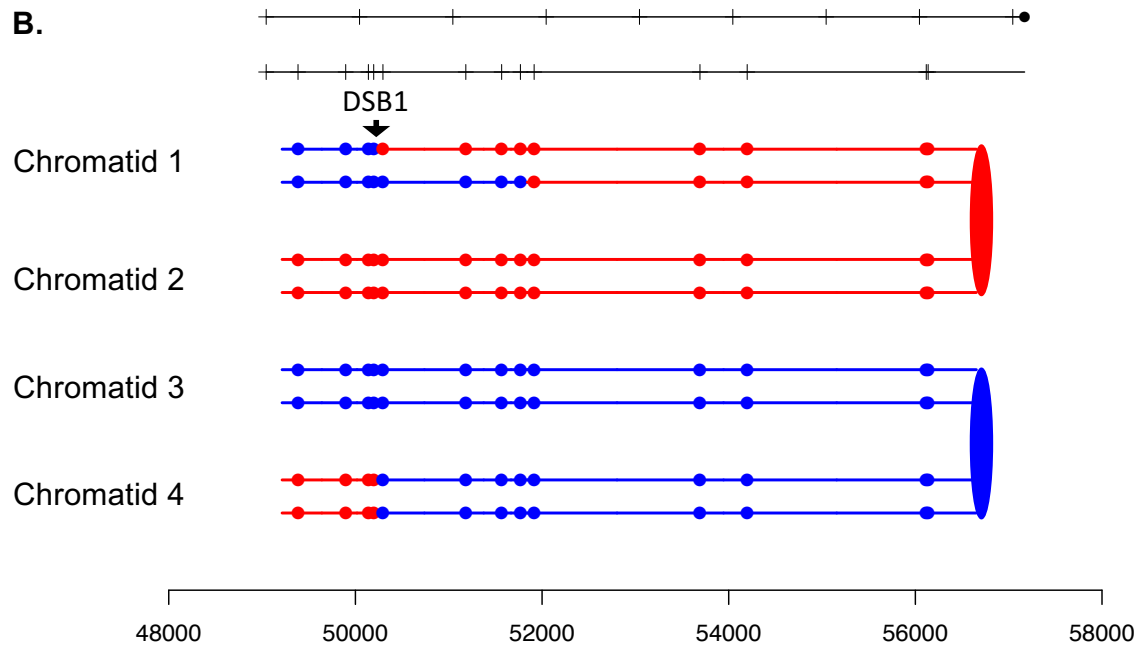

S22

A.

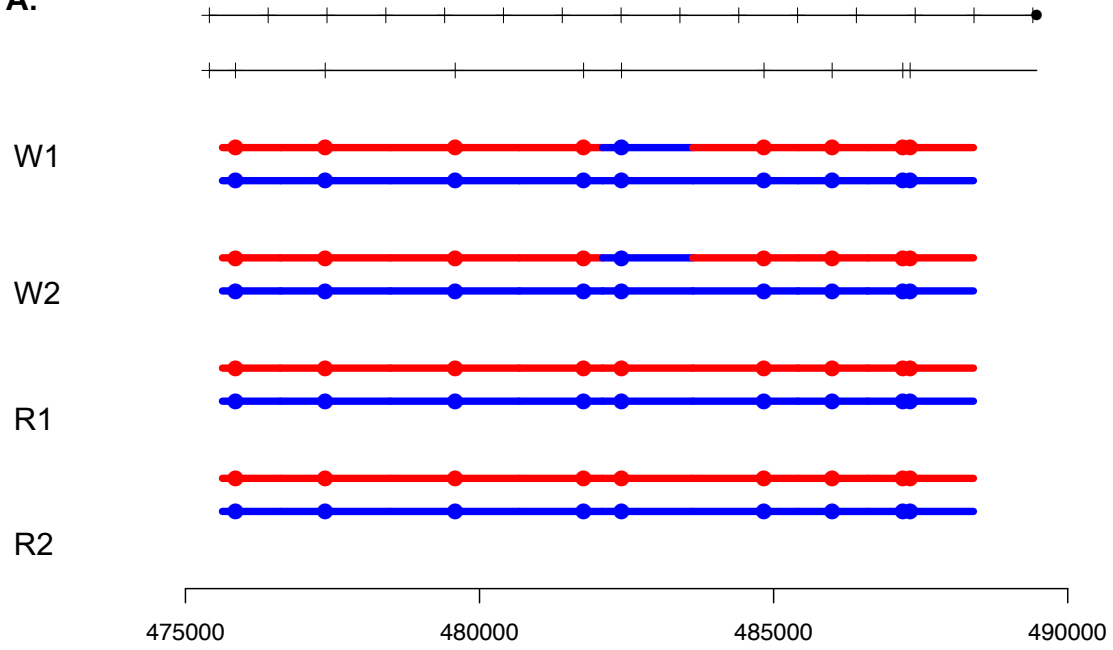

B.

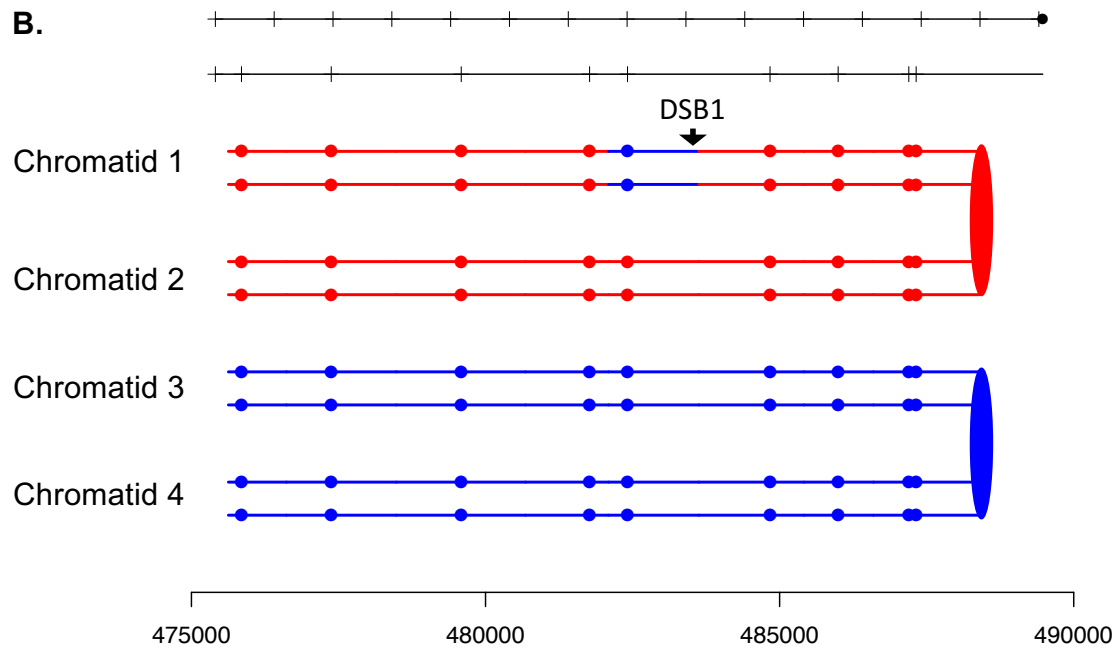

S23

A.

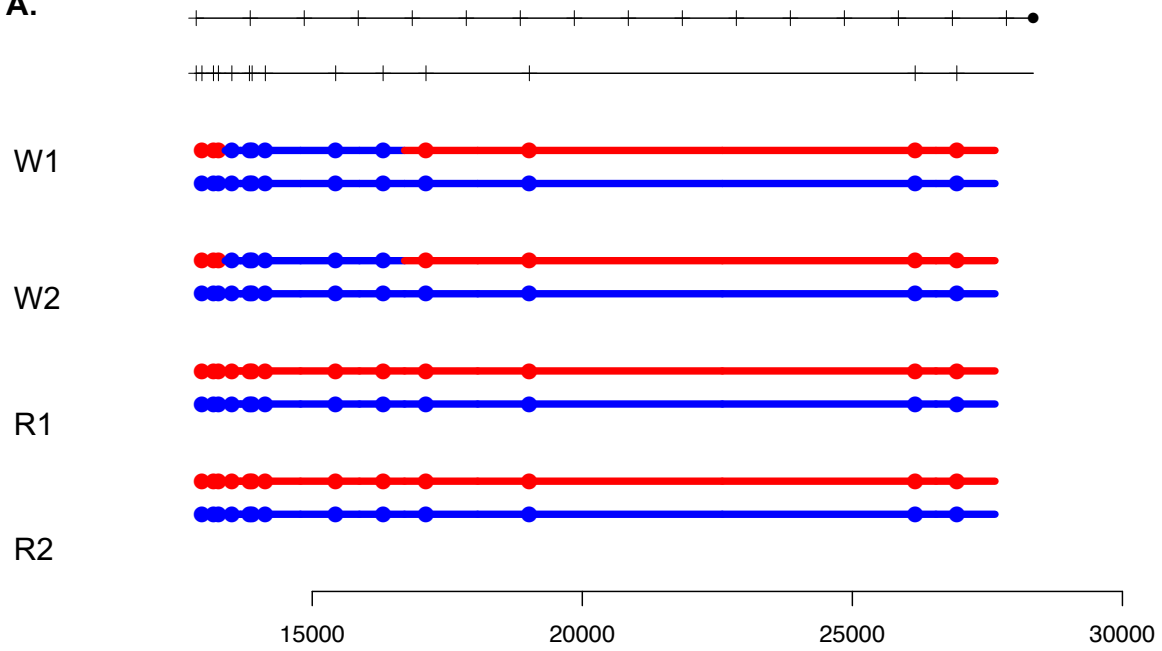

B.

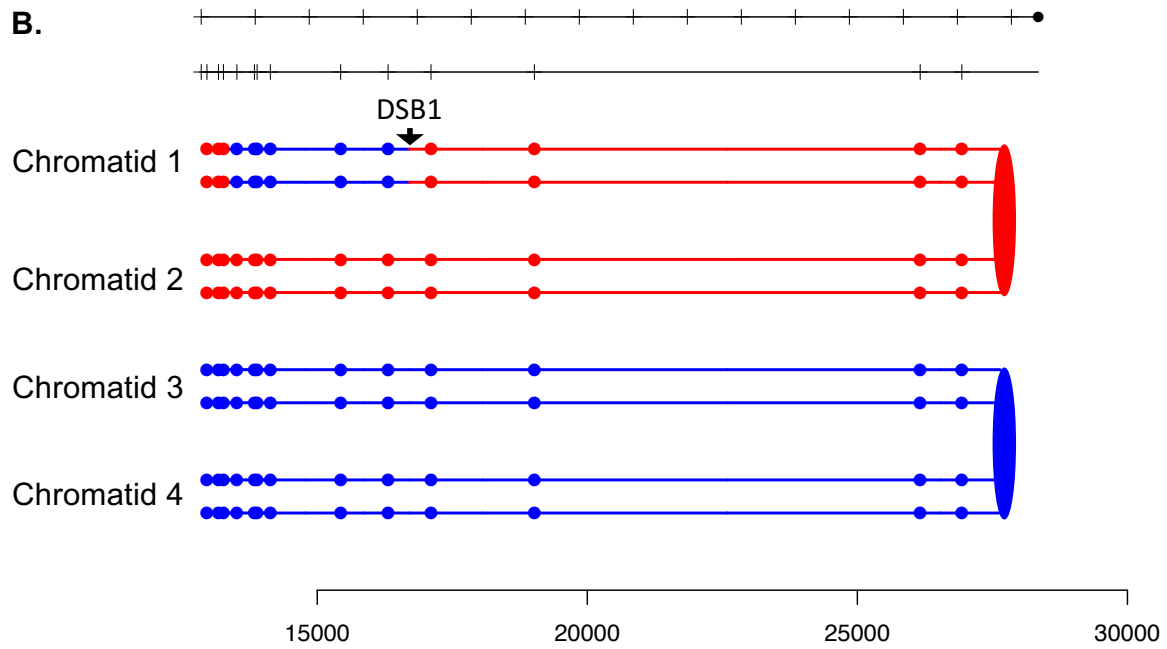

S24

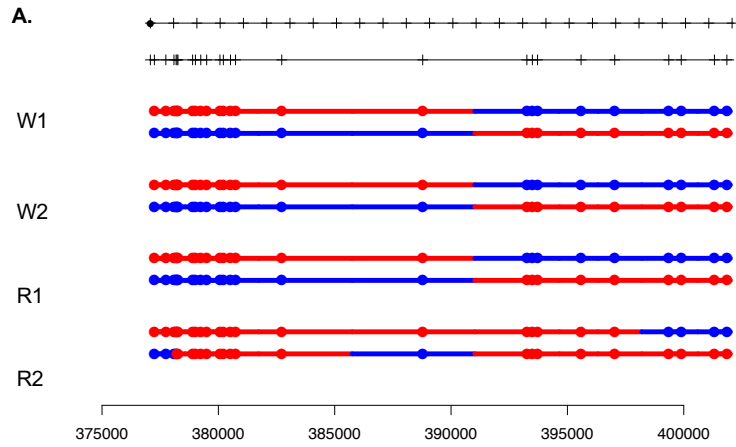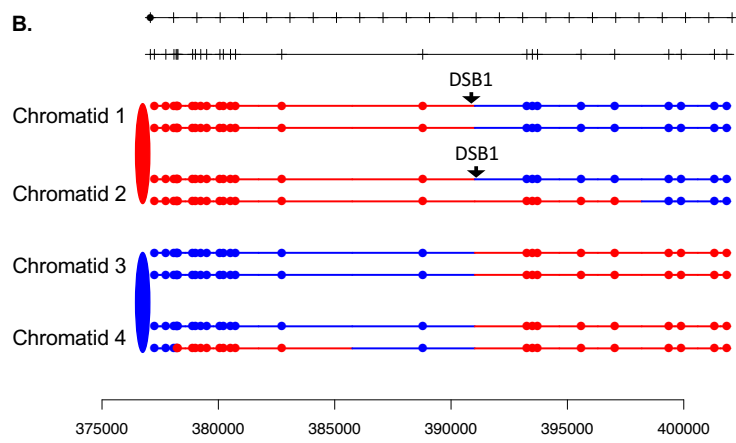

**c.** a. CO, chromatids 1 and 3

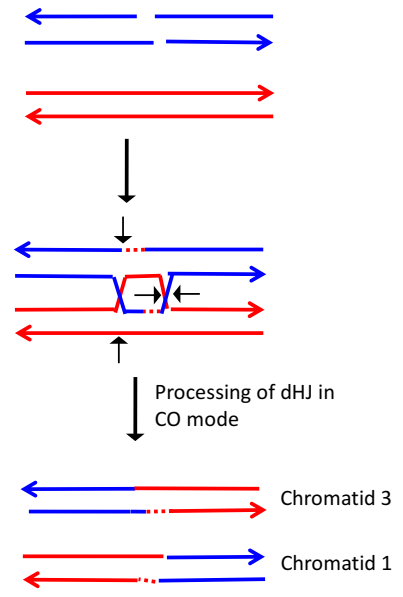

b. CO, chromatids 2 and 4

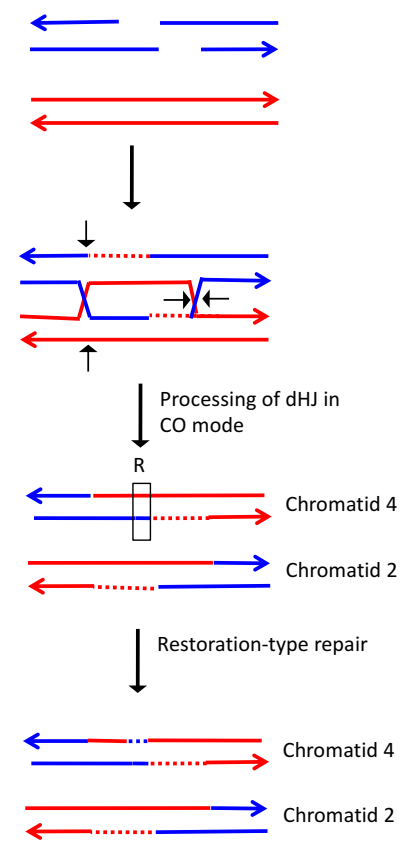

|     |     |                                                                                          |                                                                            |
|-----|-----|------------------------------------------------------------------------------------------|----------------------------------------------------------------------------|
| S24 | CO1 | CO between chromatids 1 and 3 with no heteroduplex                                       | Standard DSBR model with limited strand invasion and limited DNA synthesis |
|     | CO2 | CO between chromatids 2 and 4 with restoration tract between <i>trans</i> heteroduplexes | Standard DSBR model with tract of Mlh1-independent restoration repair      |



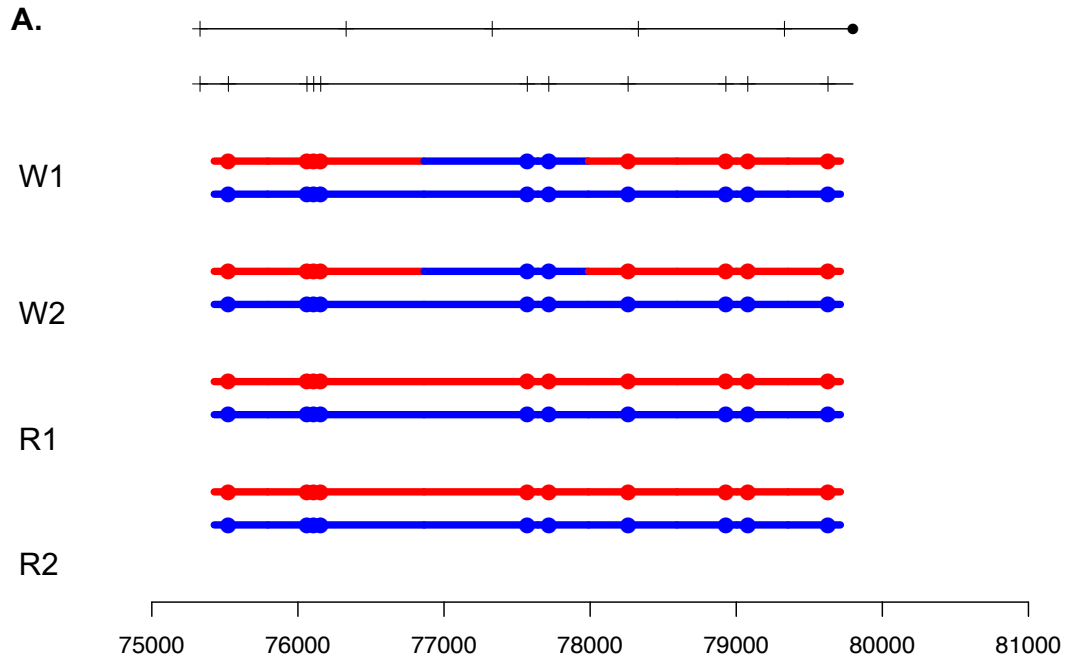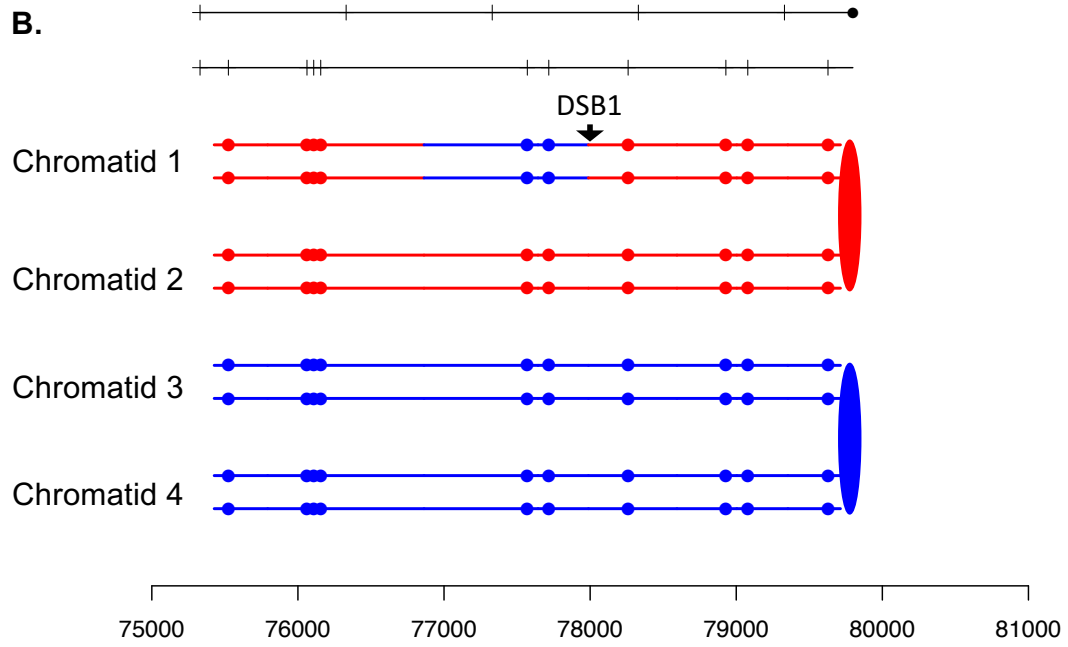

S26

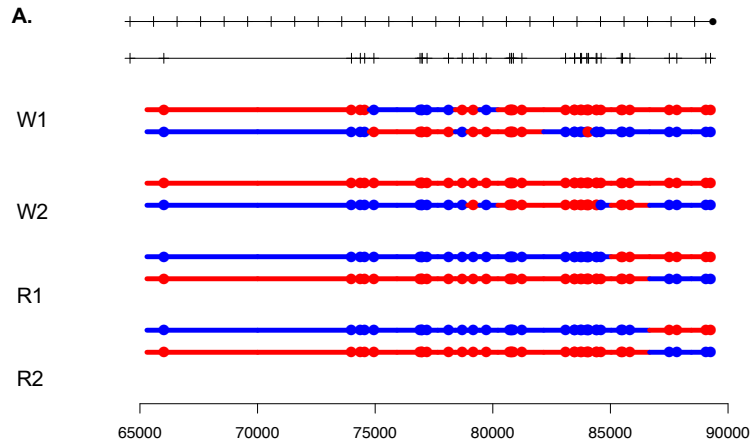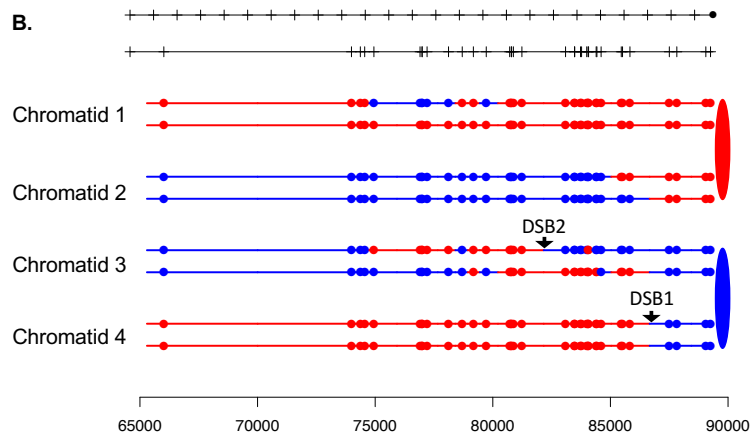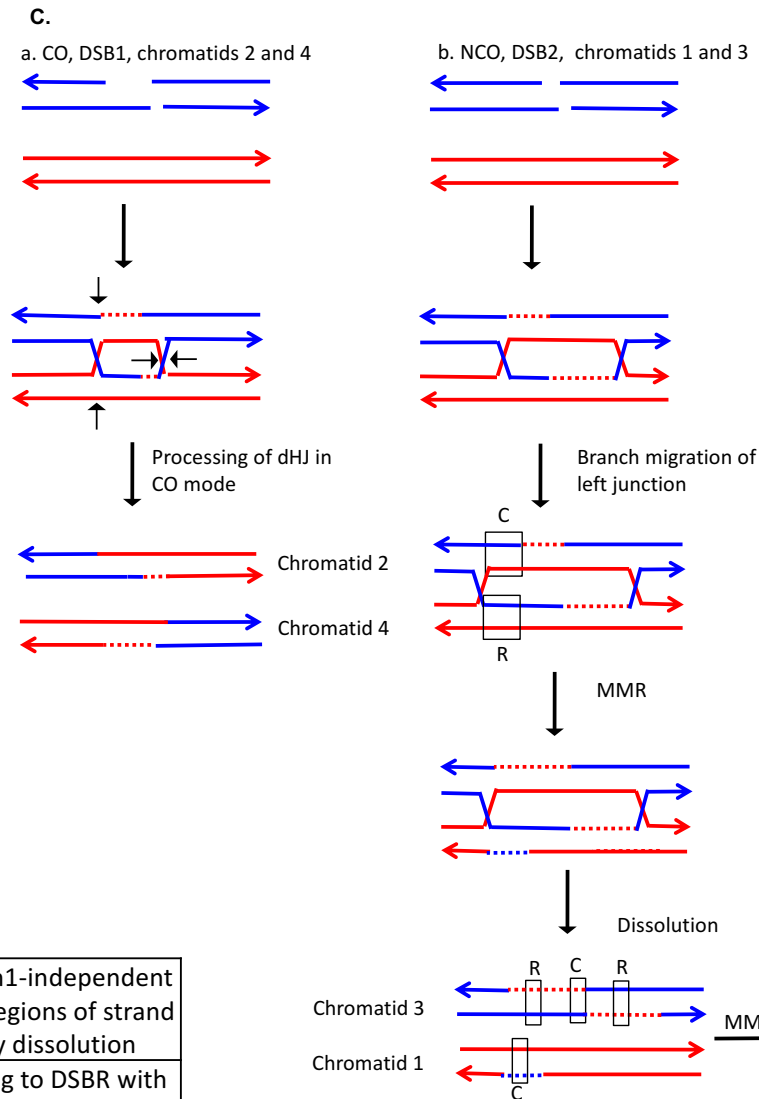

|     |     |                                                                                                        |                                                                                                       |
|-----|-----|--------------------------------------------------------------------------------------------------------|-------------------------------------------------------------------------------------------------------|
| S26 | NCO | Symmetric heteroduplexes; regions of homoduplex within heteroduplex; strand switch within heteroduplex | Branch migration; Mlh1-independent MMR; DSB between regions of strand switch, followed by dissolution |
|     | CO  | CO between chromatids 2 and 4 with heteroduplex on only one chromatid                                  | Standard CO according to DSBR with one heteroduplex occurring in region without SNP                   |

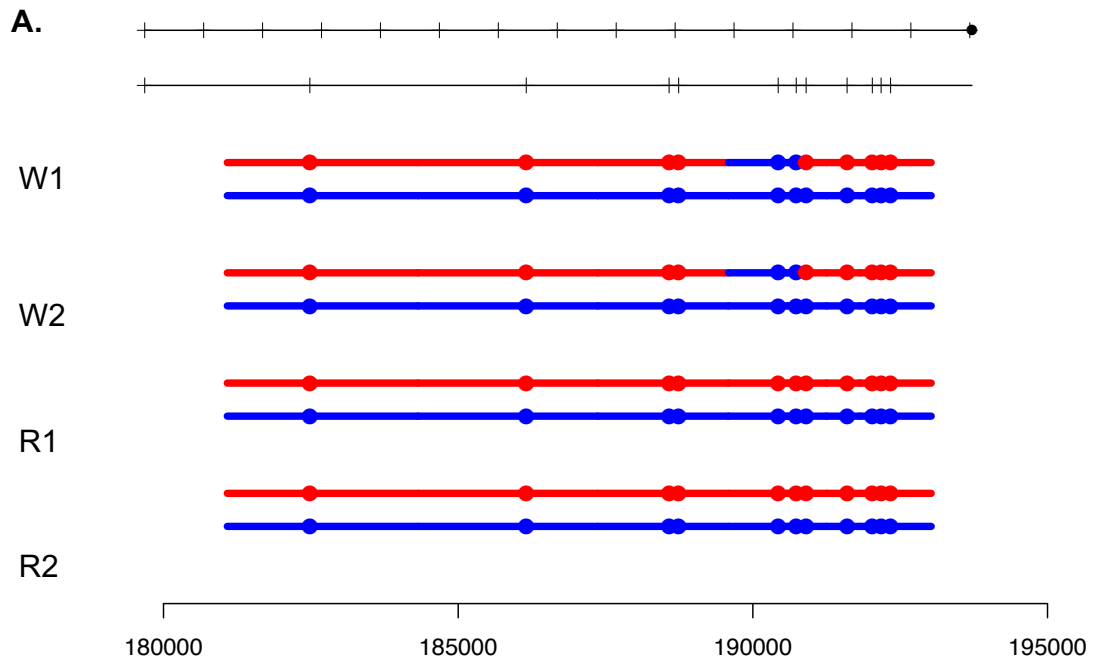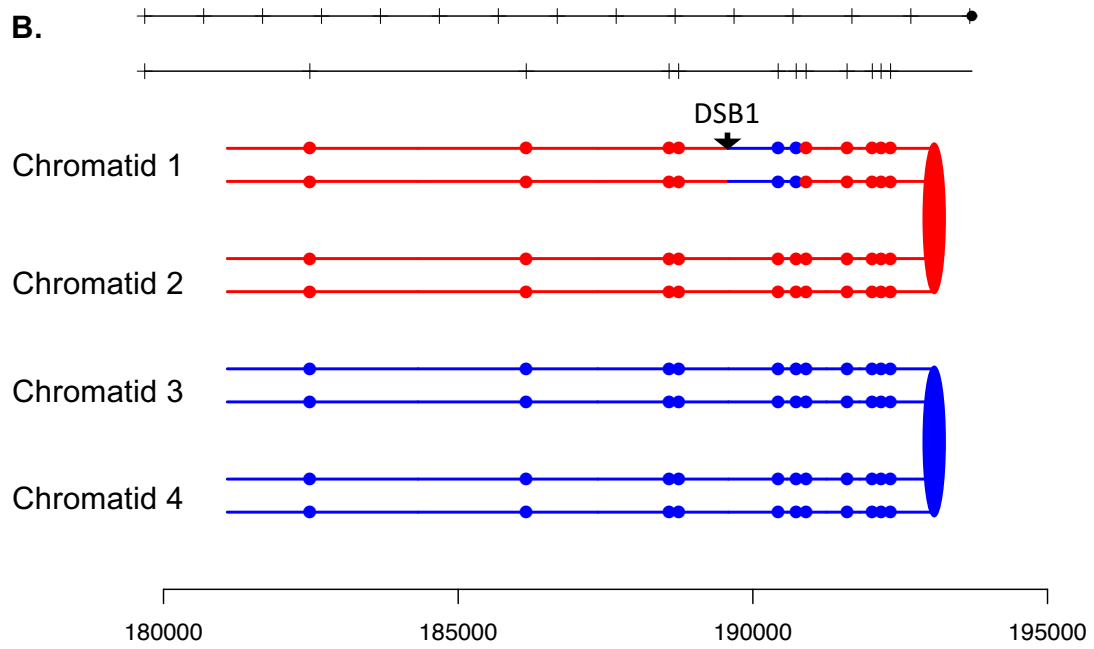

S28

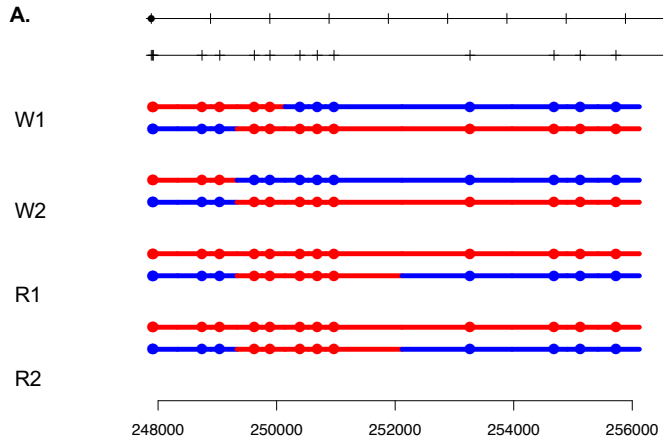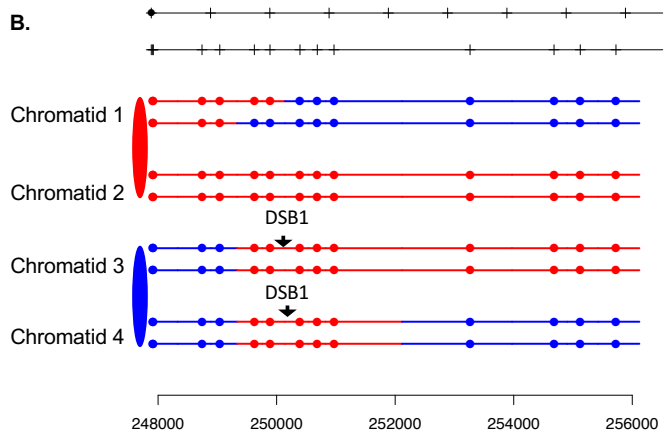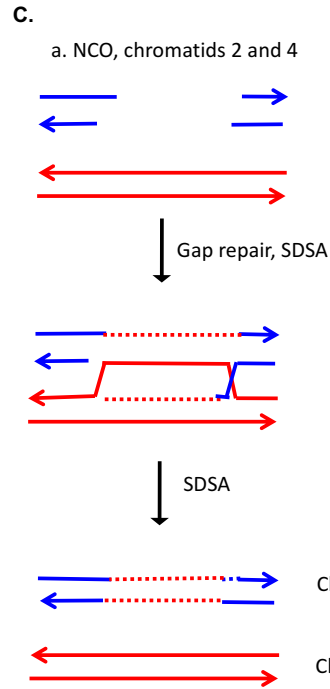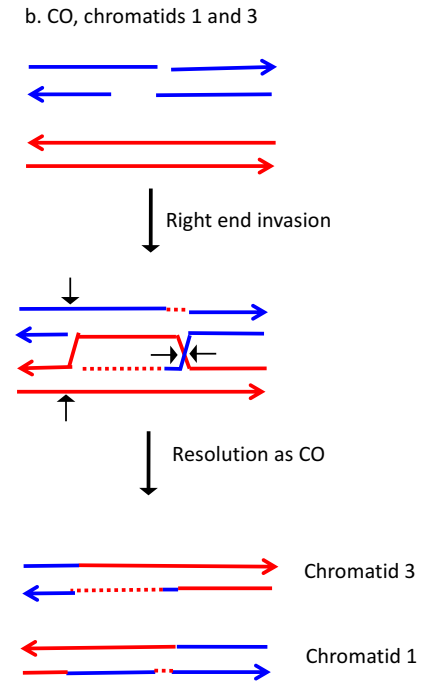

|     |     |                                                  |                                                                                     |
|-----|-----|--------------------------------------------------|-------------------------------------------------------------------------------------|
| S28 | NCO | Long conversion tract spanning putative DSB site | Repair of double-stranded DNA gap                                                   |
|     | CO  | Heteroduplex tract on only one side of DSB site  | Standard CO according to DSBR with one heteroduplex occurring in region without SNP |

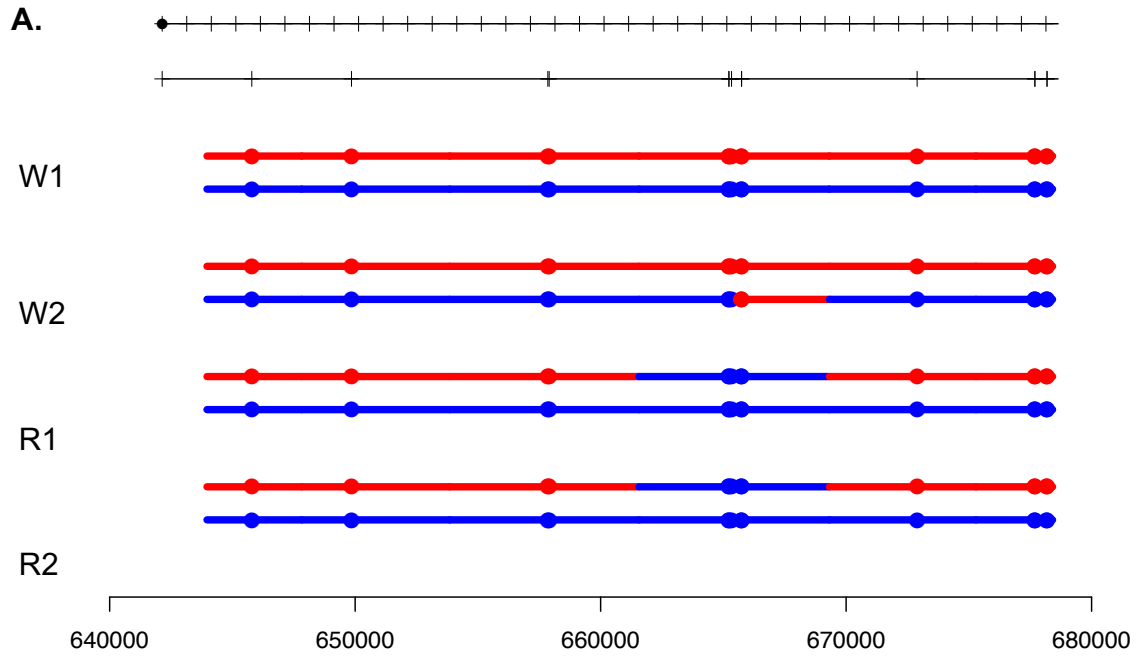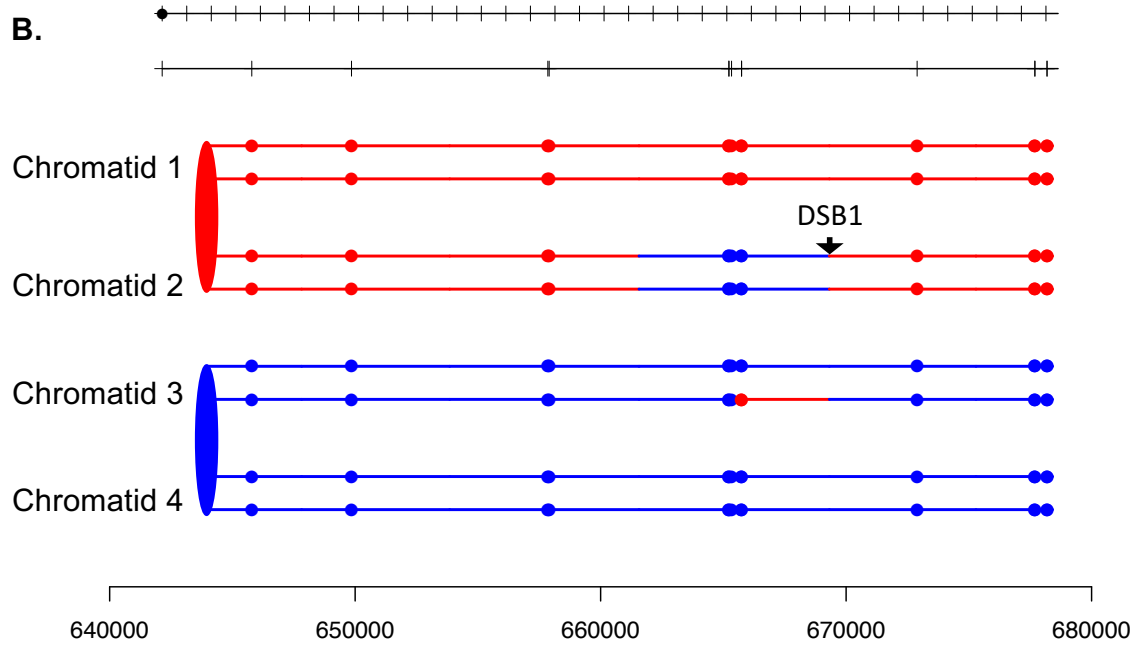

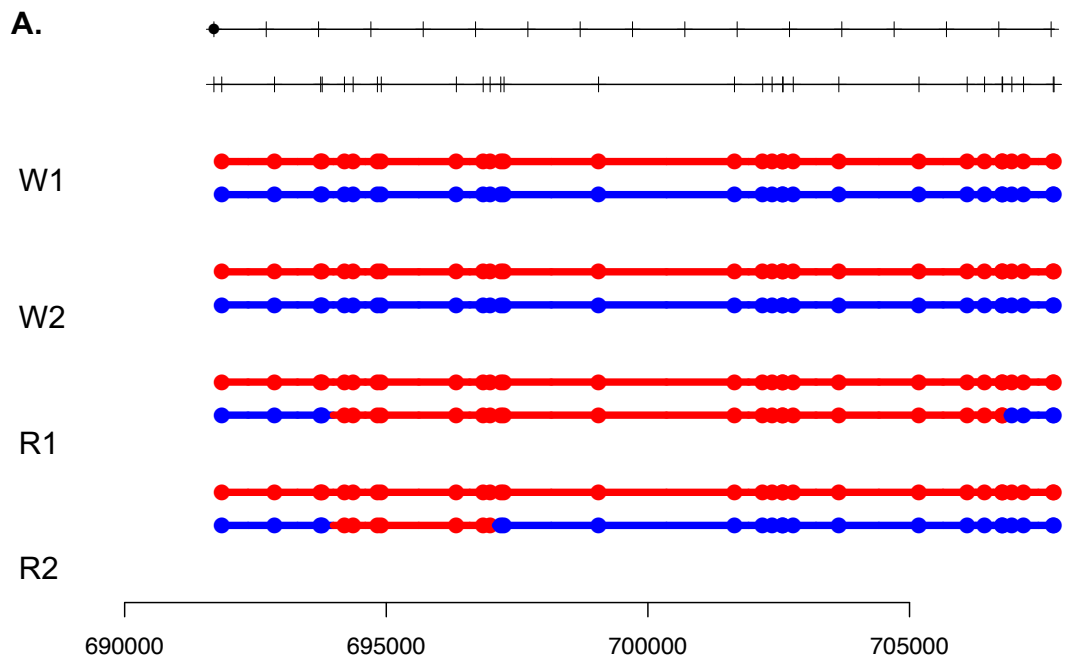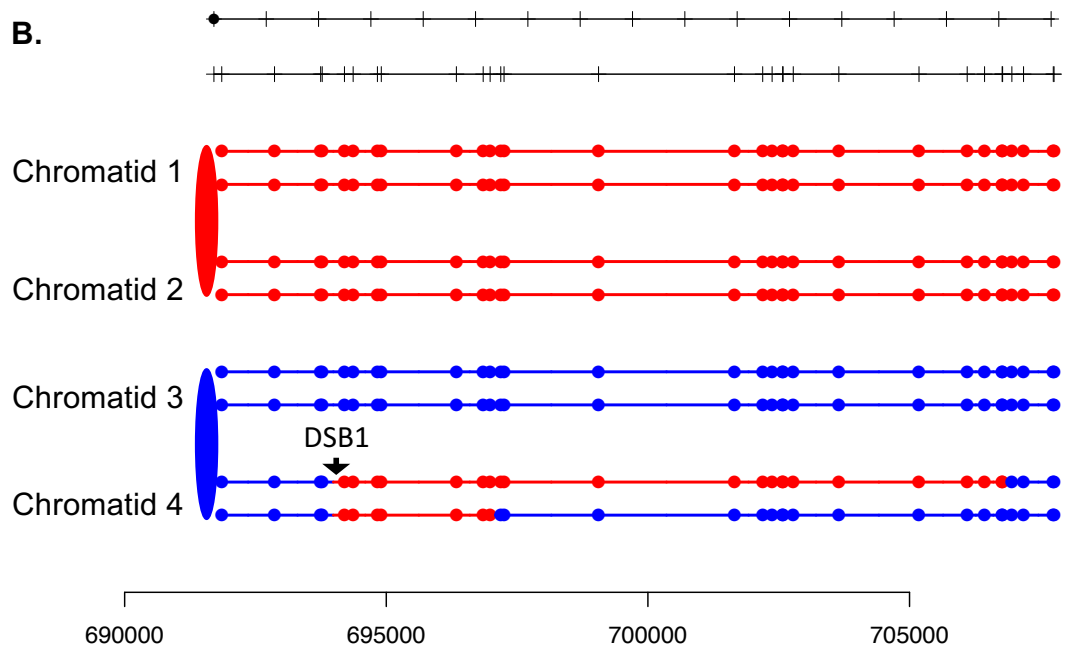

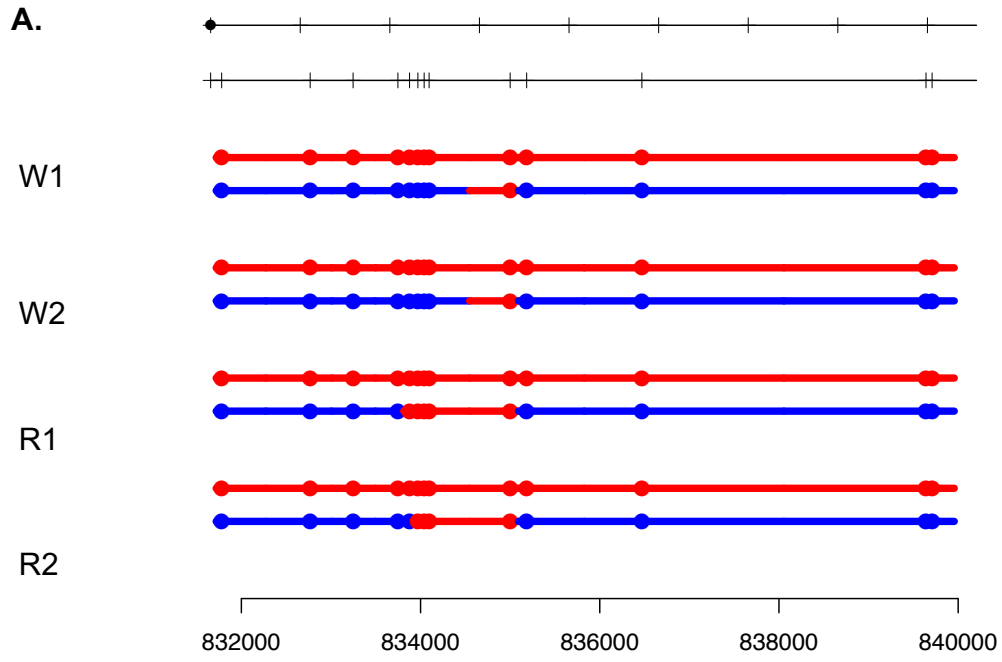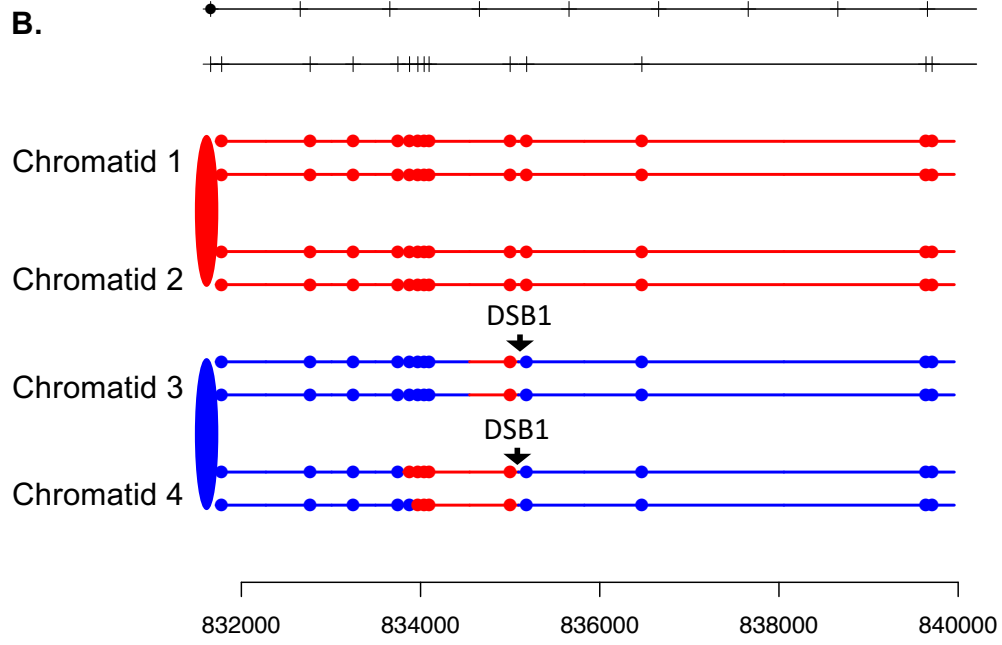

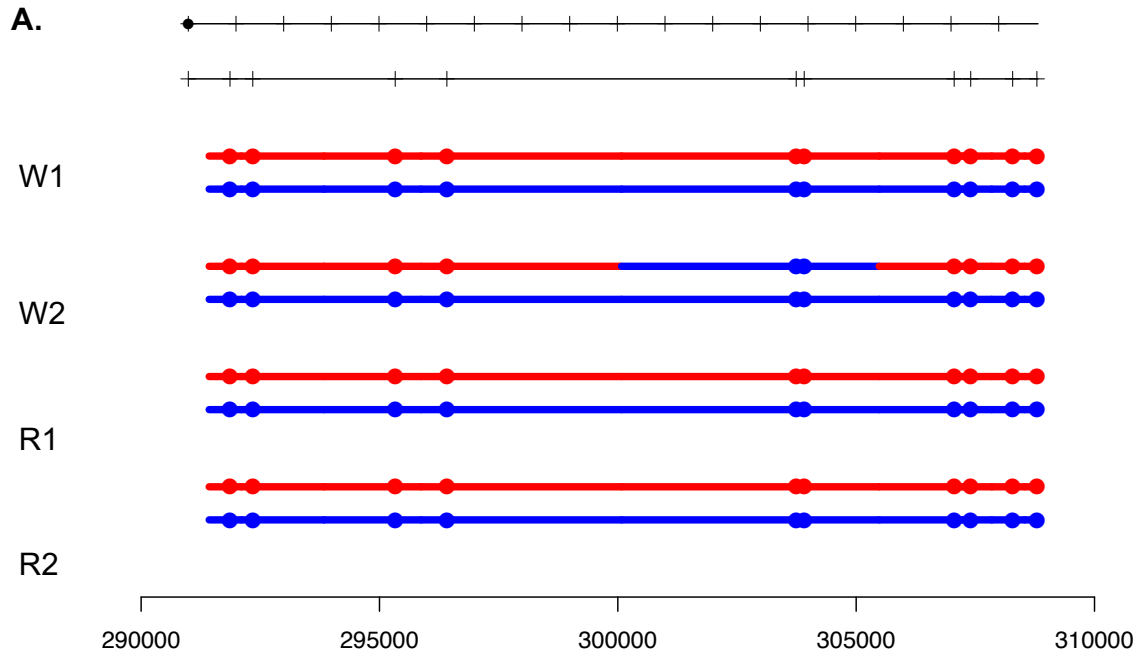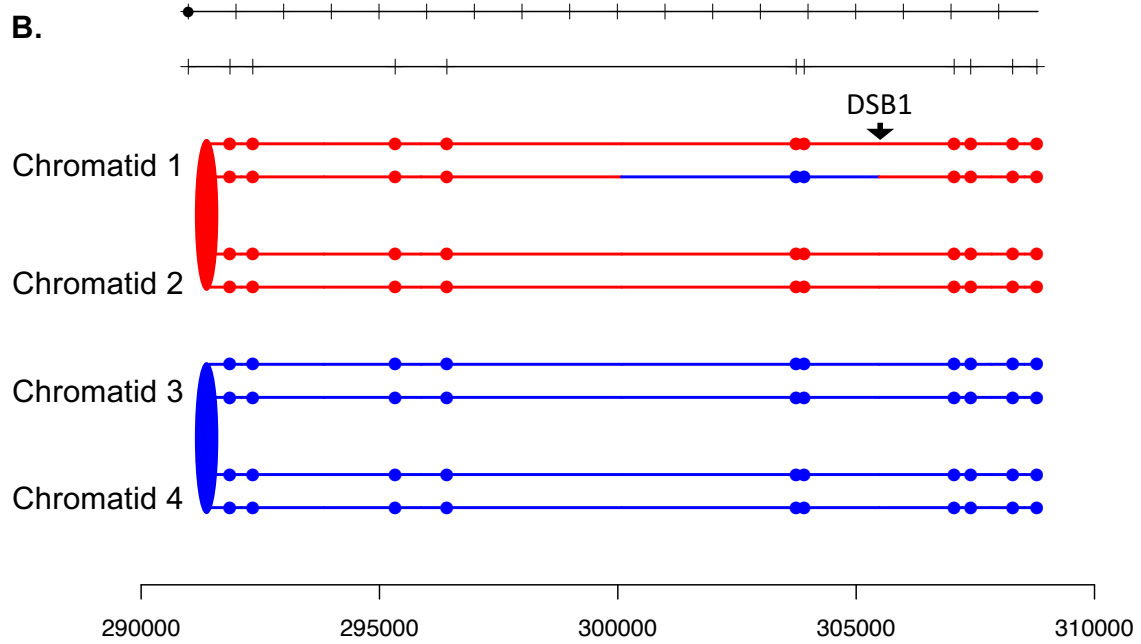



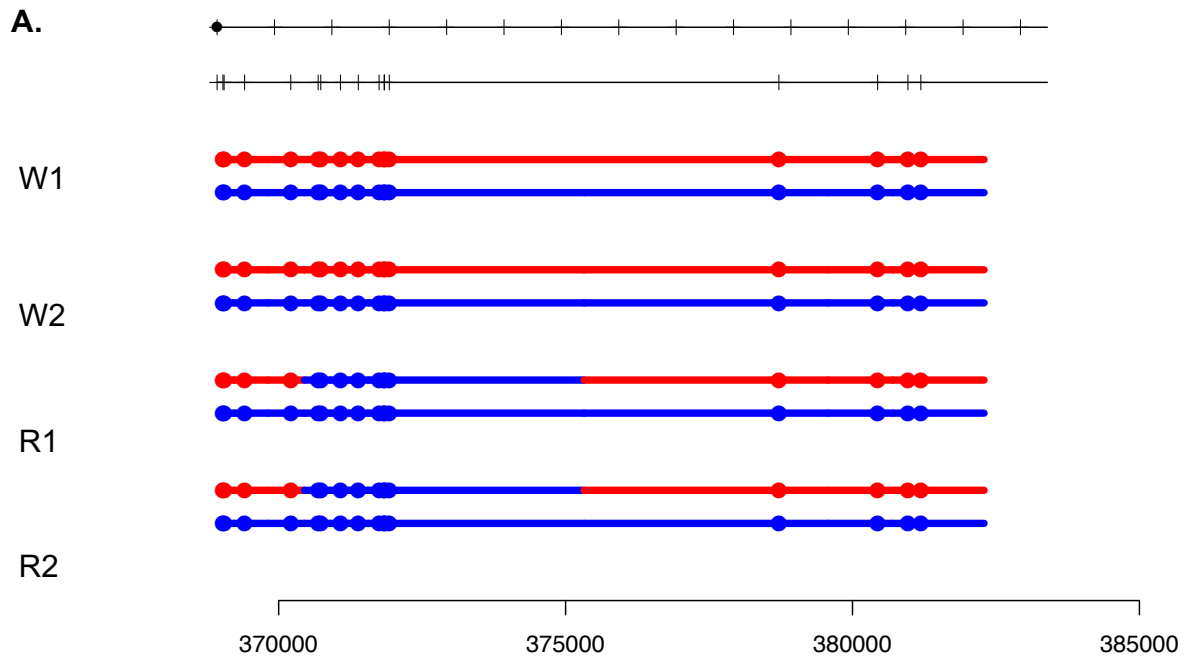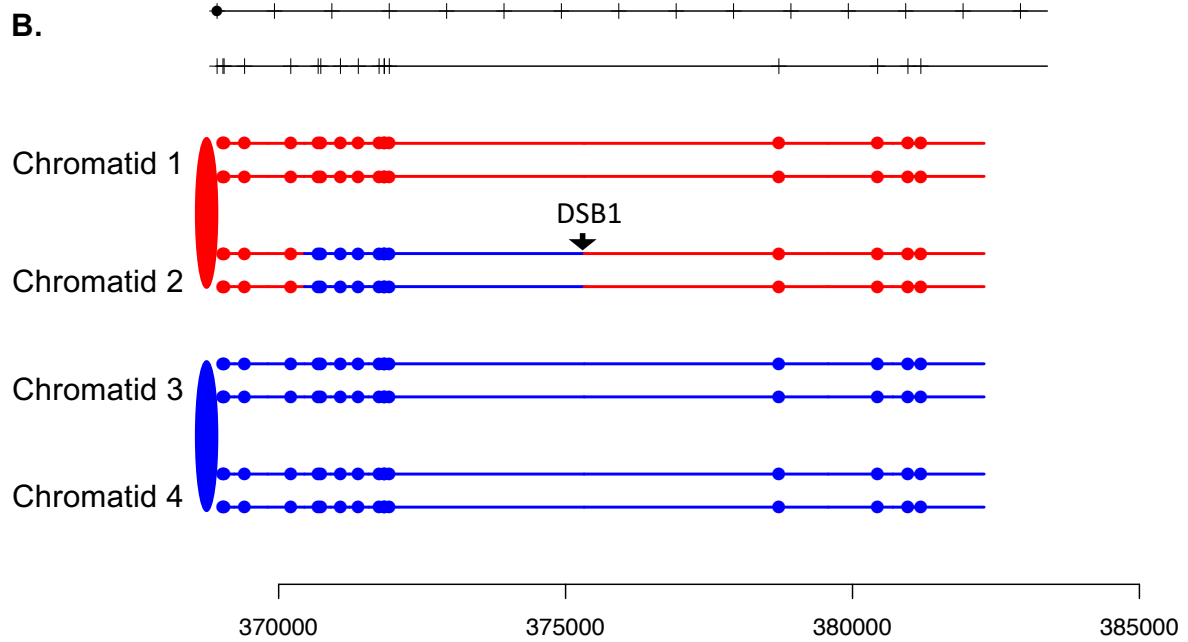

S34

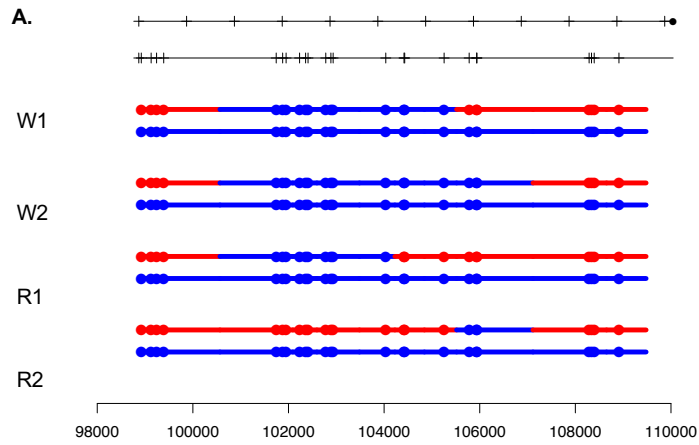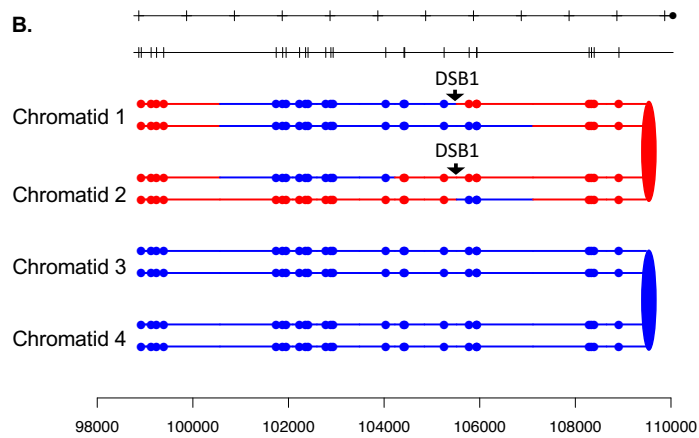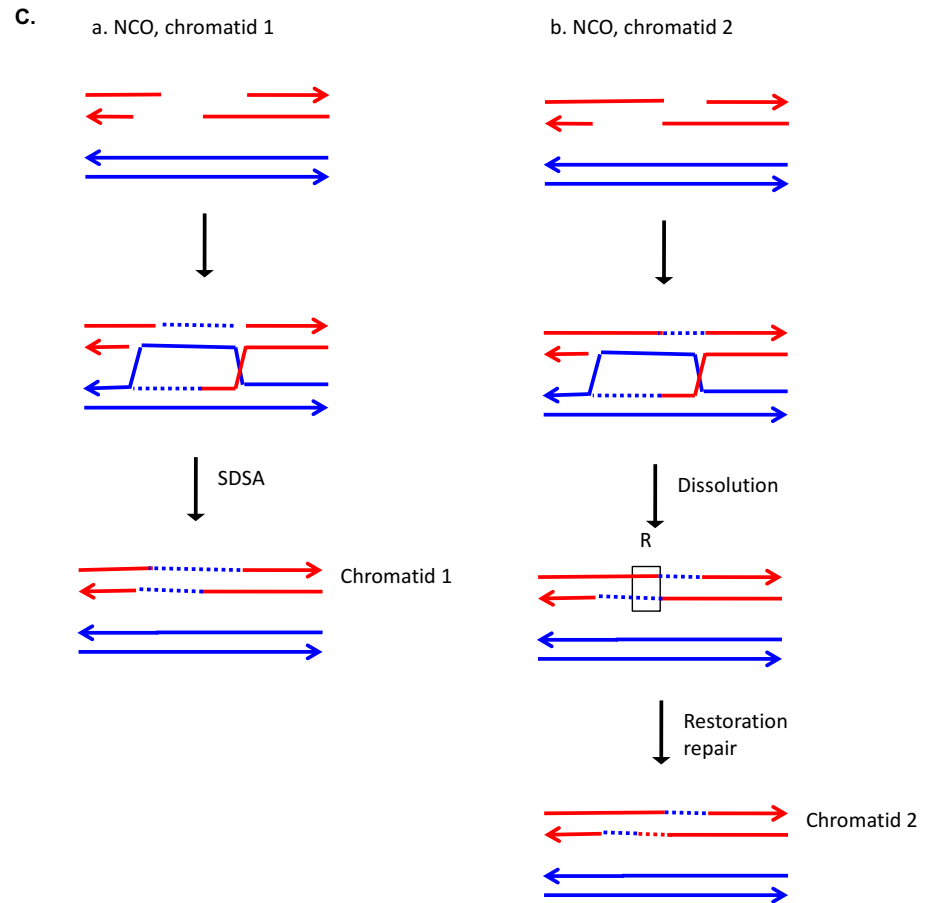

|     |      |                                                                |                                                       |
|-----|------|----------------------------------------------------------------|-------------------------------------------------------|
| S34 | NCO1 | Long conversion-tract on chromatid 1                           | Repair of double-stranded DNA gap                     |
|     | NCO2 | Heteroduplexes in trans on chromatid 2 separated by homoduplex | Dissolution of dHJ associated with restoration repair |

A.

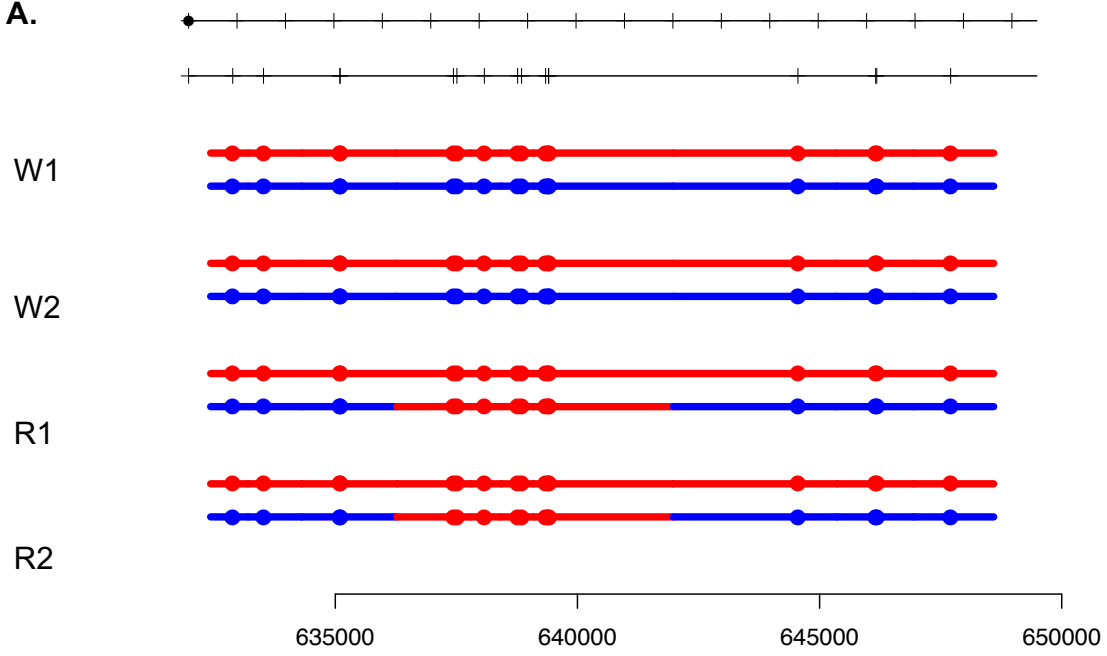

B.

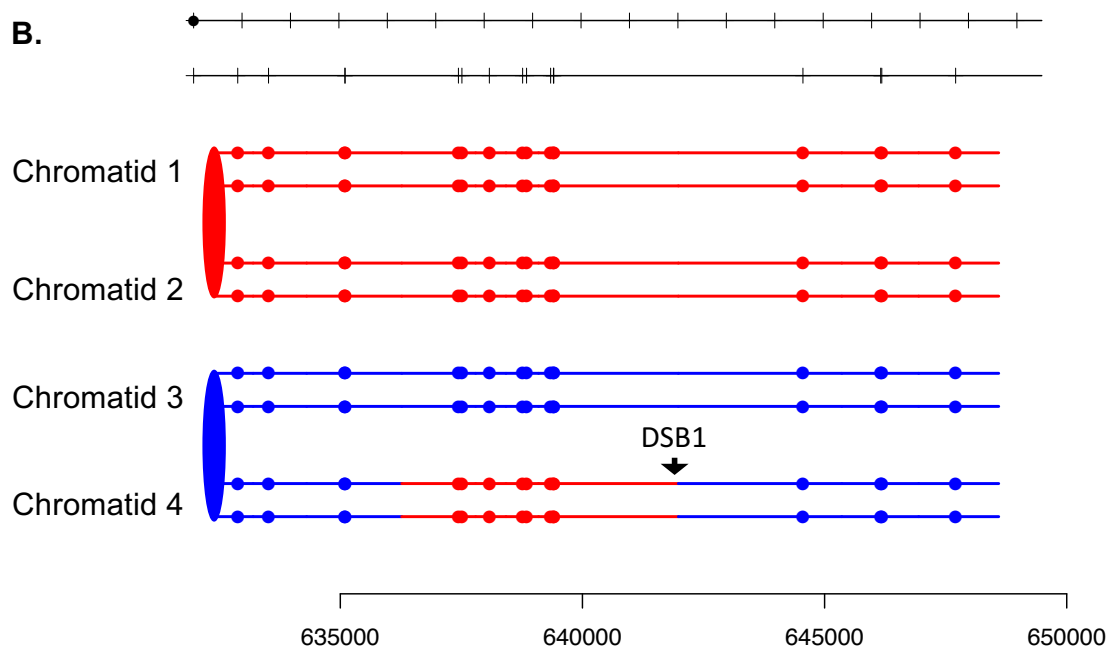

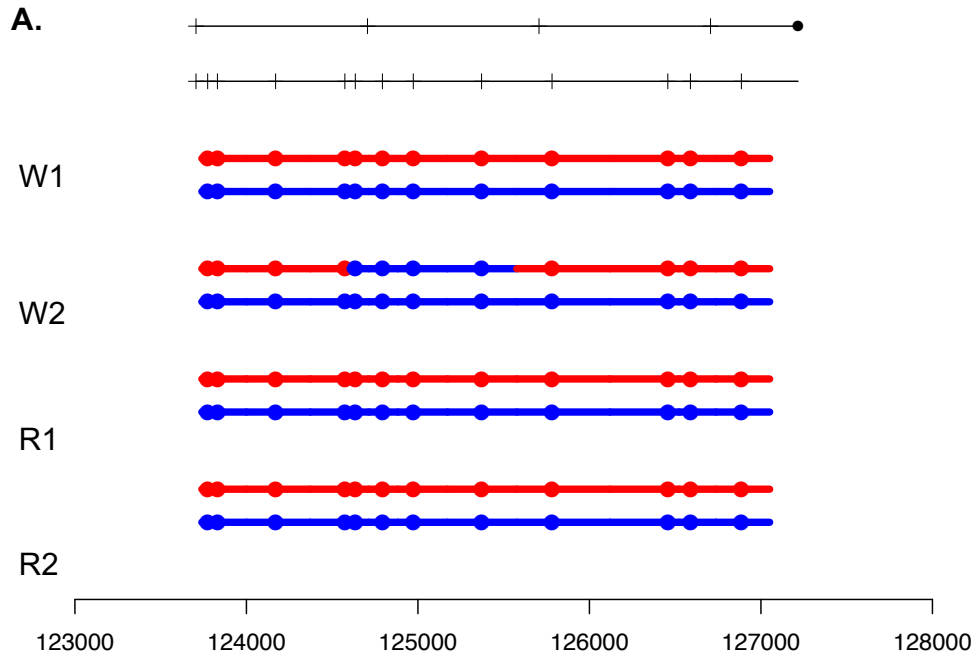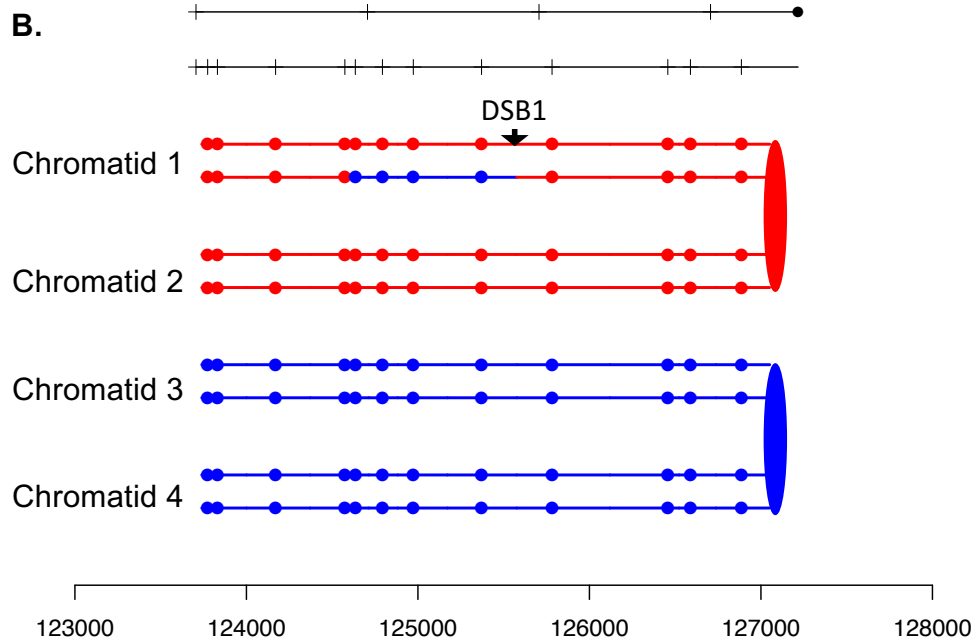

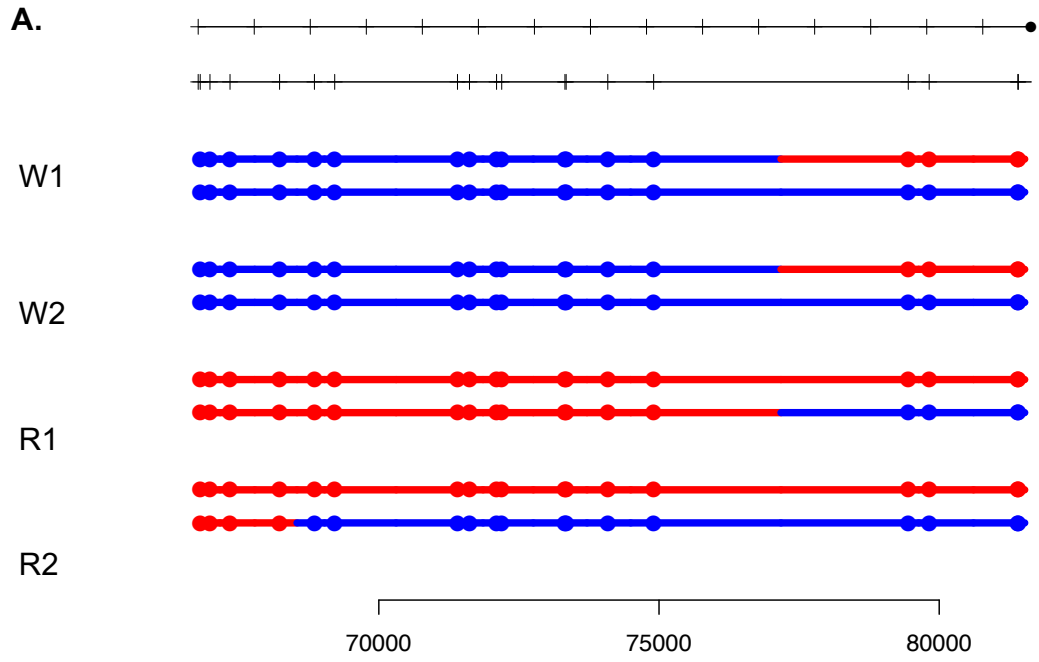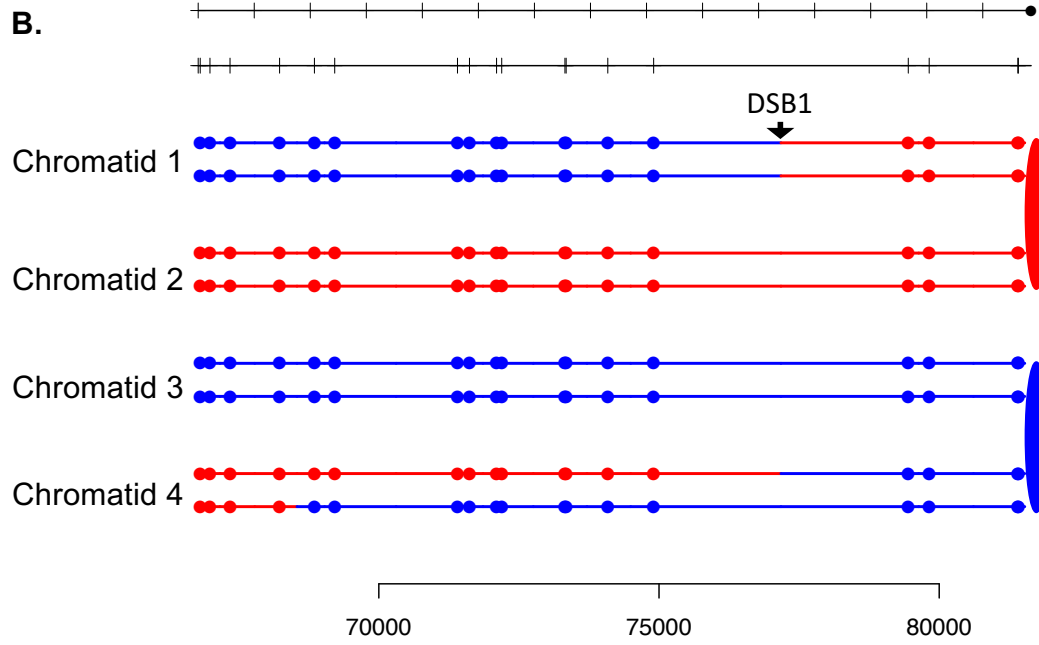

S38

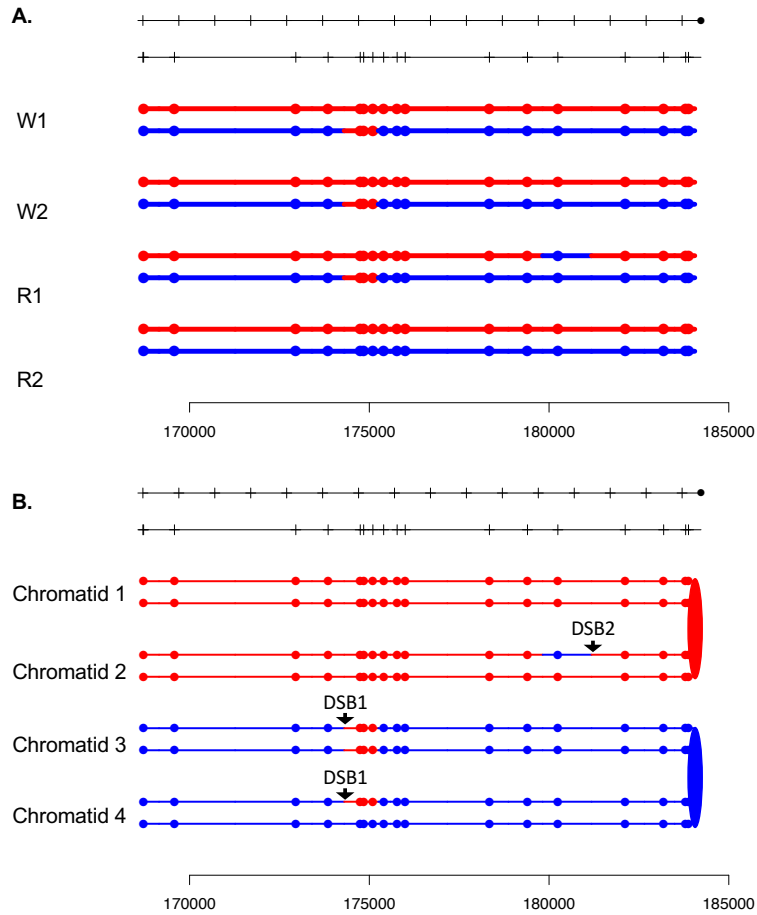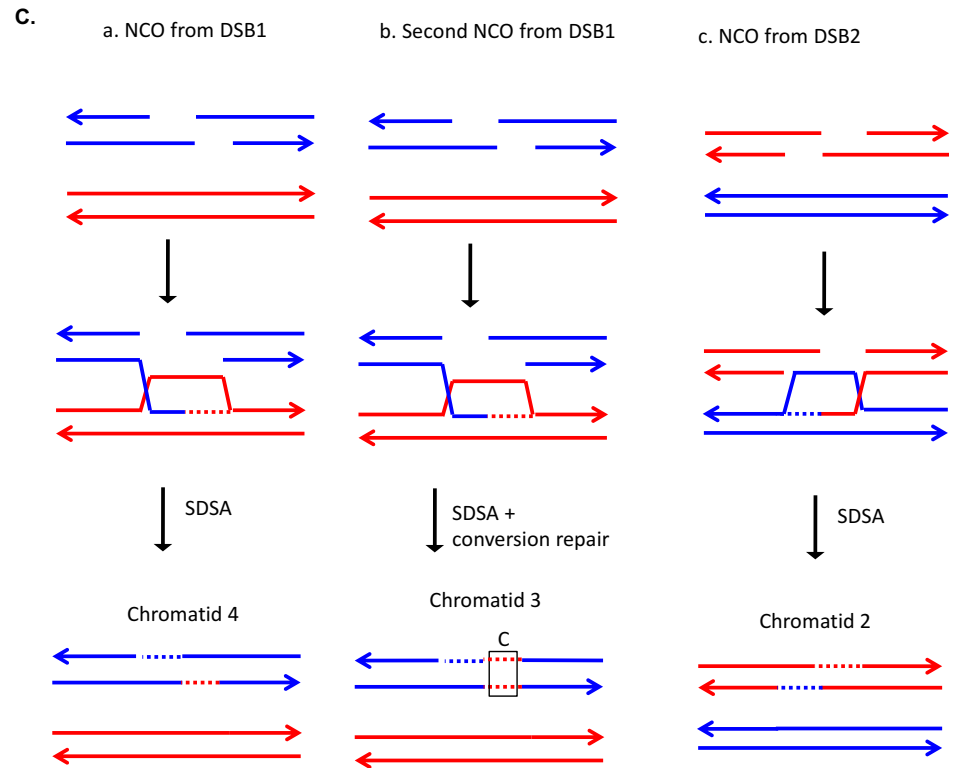

|     |      |                                                       |                            |
|-----|------|-------------------------------------------------------|----------------------------|
| S38 | NCO1 | Conversion tract adjacent to DSB1 site on chromatid 3 | SDSA, Mlh1-independent MMR |
|     | NCO2 | Heteroduplex adjacent to DSB1 site on chromatid 4     | SDSA                       |
|     | NCO3 | Heteroduplex adjacent to DSB2 site on chromatid 2     | SDSA                       |

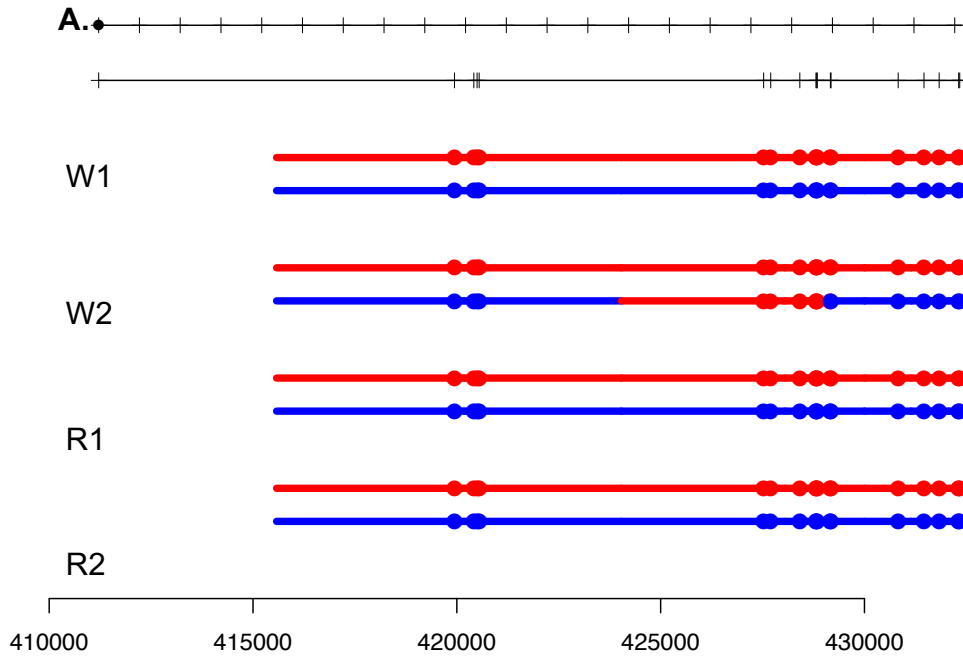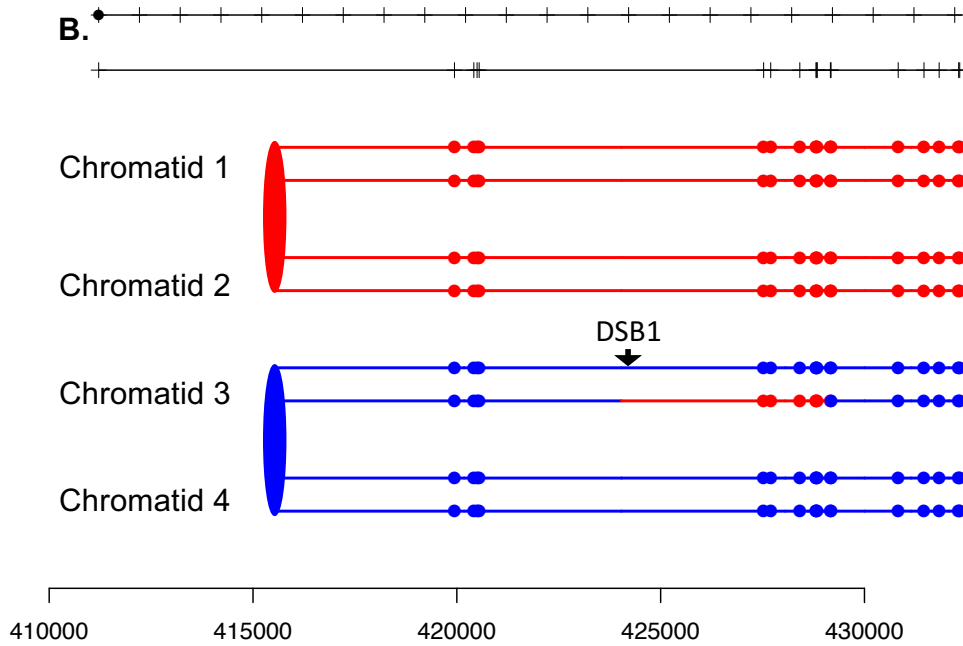

**A.**

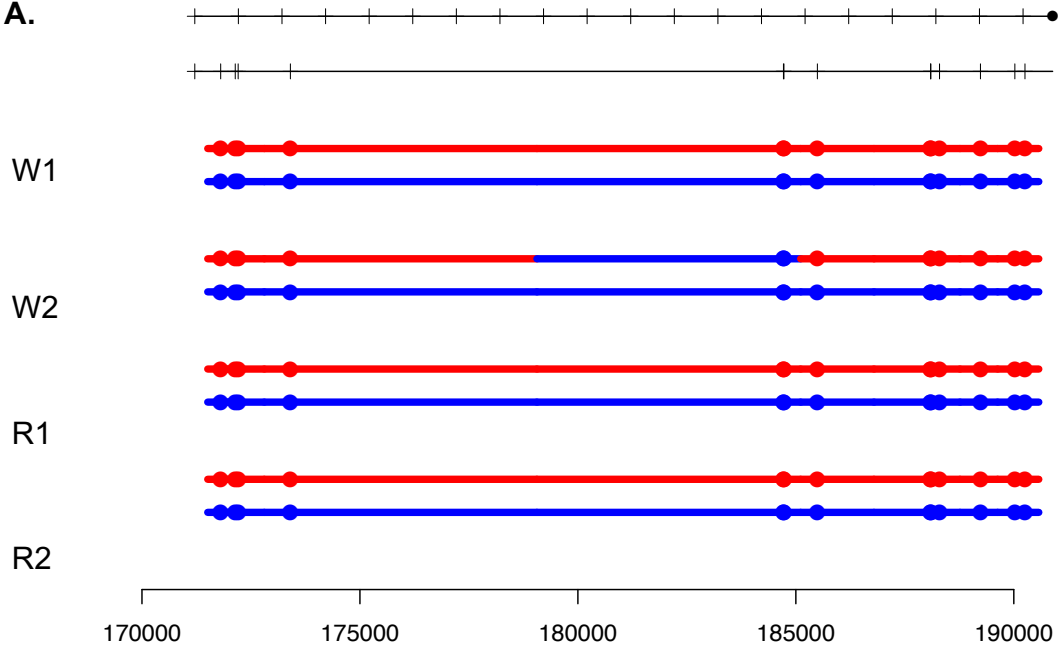

**B.**

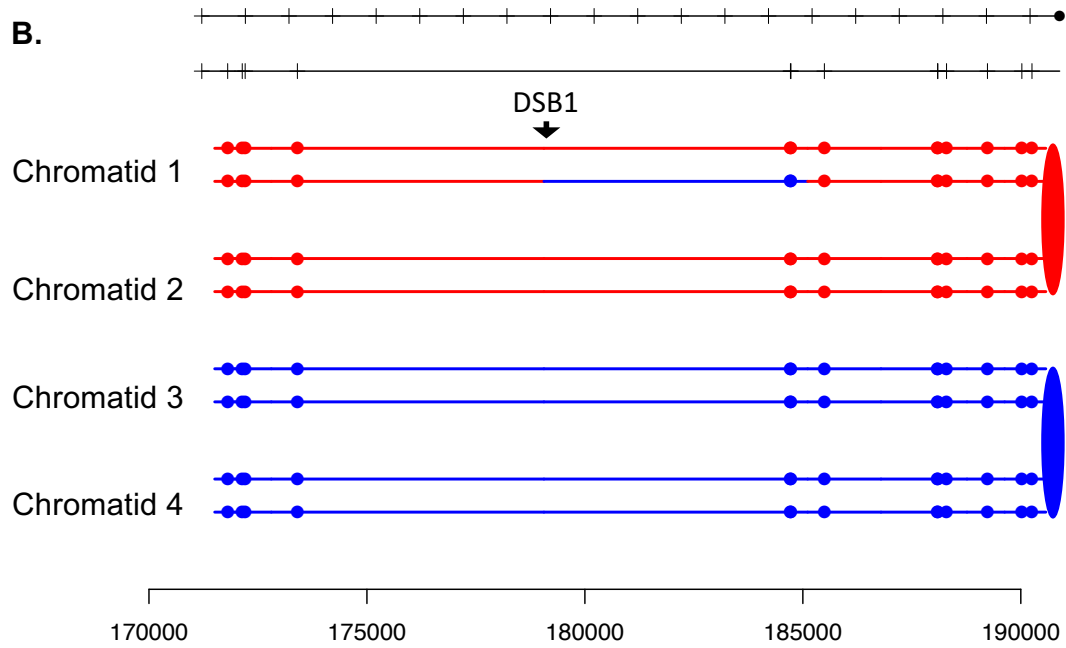



S41

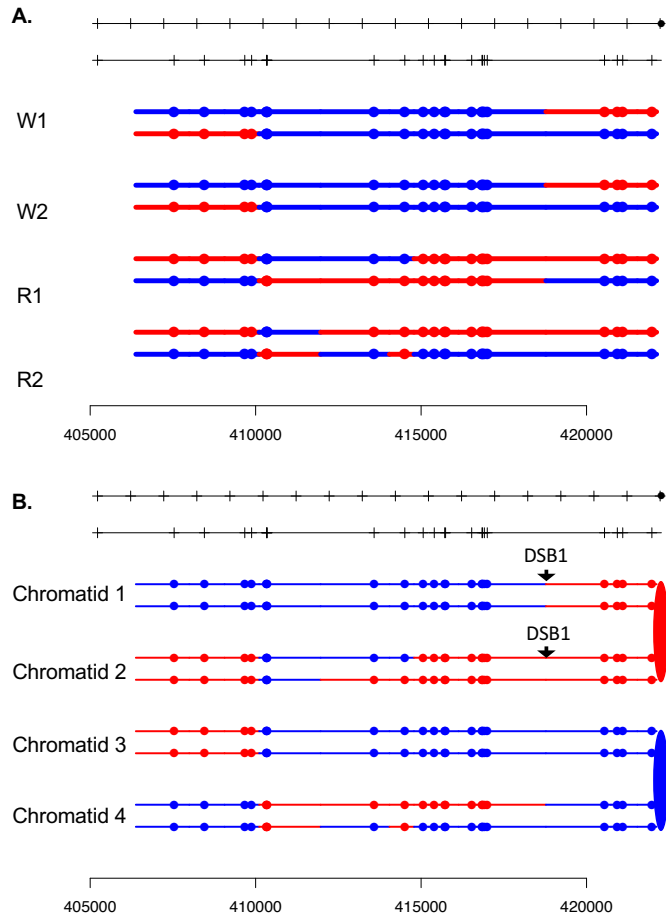

**C.**

a. CO, chromatids 1 and 3

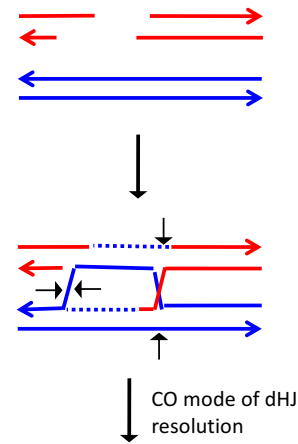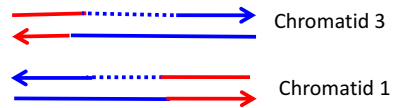

b. NCO, chromatids 2 and 4

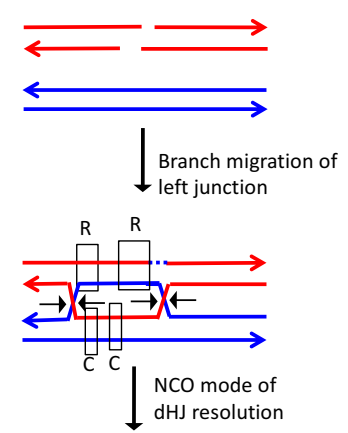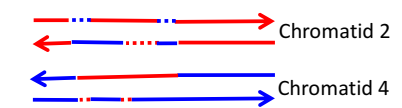

Patchy conversion and restoration repair

|     |     |                                                                                        |                                        |
|-----|-----|----------------------------------------------------------------------------------------|----------------------------------------|
| S41 | NCO | Symmetric heteroduplexes on chromatids 2 and 4; homoduplex regions within heteroduplex | Branch migration; Mlh1-independent MMR |
|     | CO  | Crossover between chromatids 1 and 3 associated with long conversion tract             | Repair of double-stranded DNA gap      |

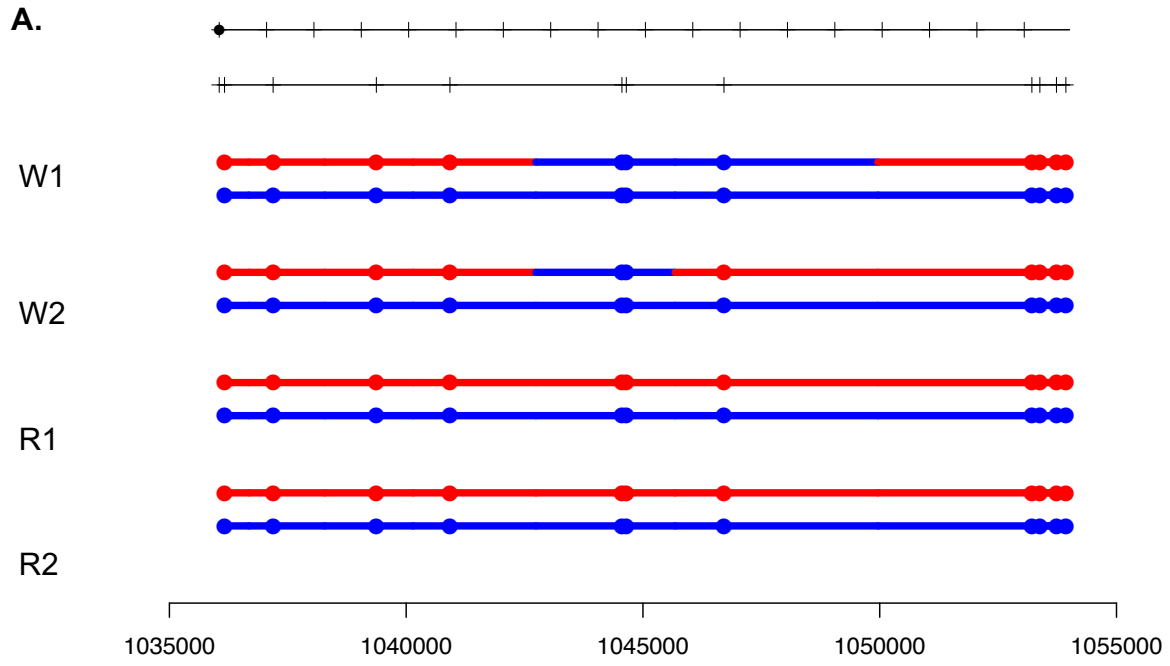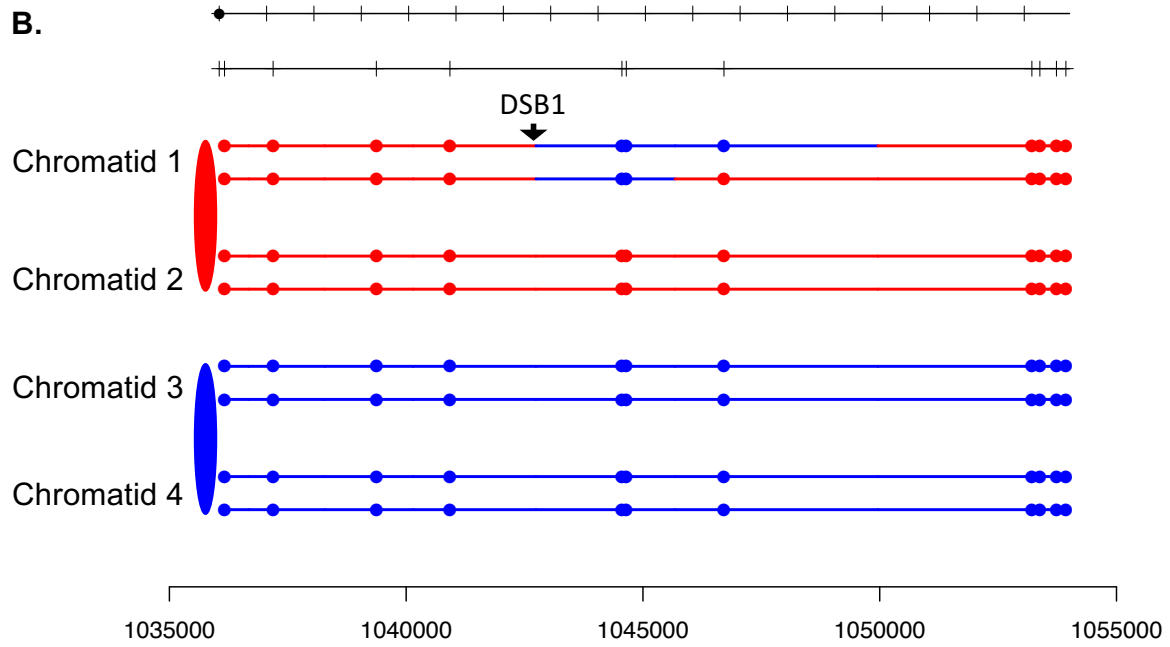

S43

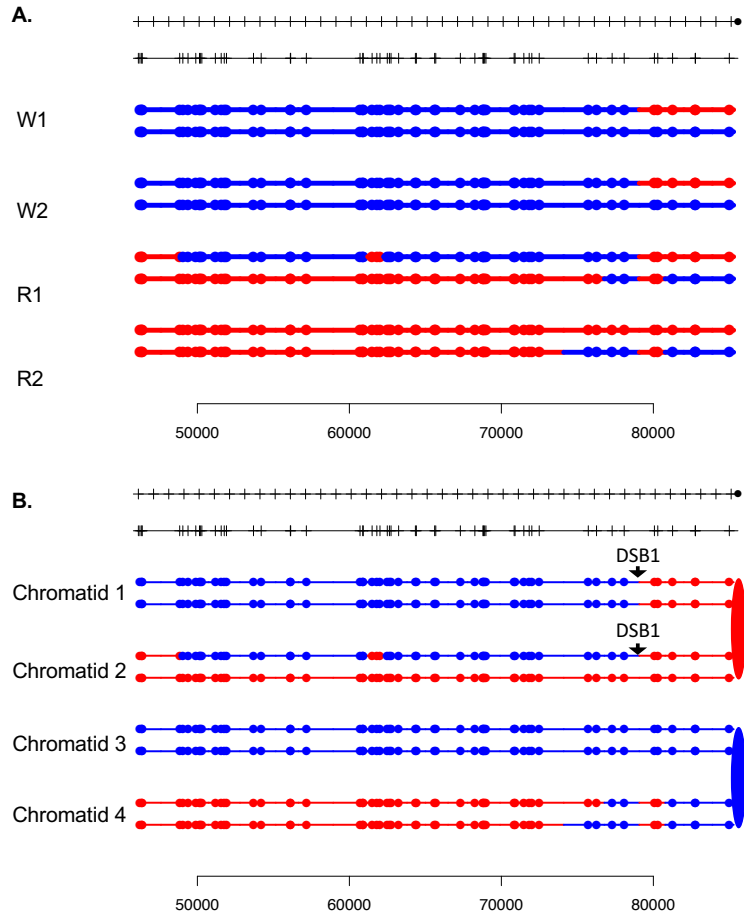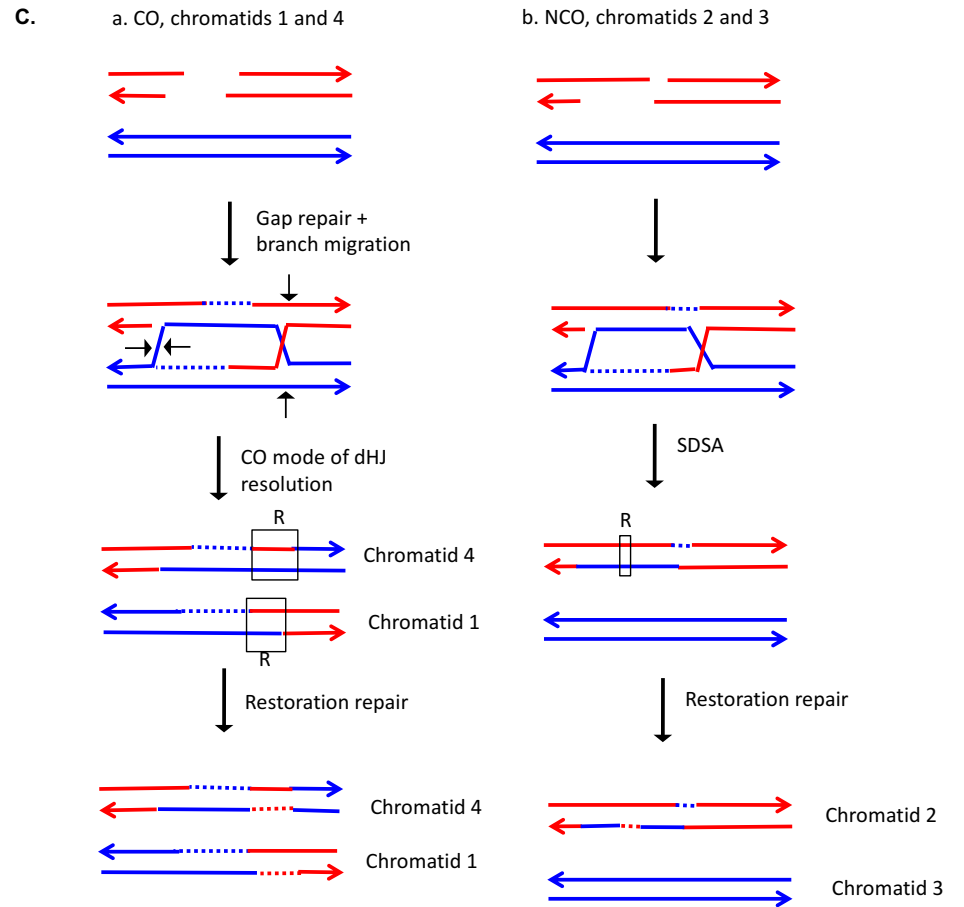

|     |     |                                                                                     |                                        |
|-----|-----|-------------------------------------------------------------------------------------|----------------------------------------|
| S43 | CO  | Restoration repair on one side of CO chromatid 4 and conversion repair on the other | Branch migration; Mlh1-independent MMR |
|     | NCO | Long heteroduplex region with short restoration tract                               | SDSA with Mlh1-independent MMR         |

S44

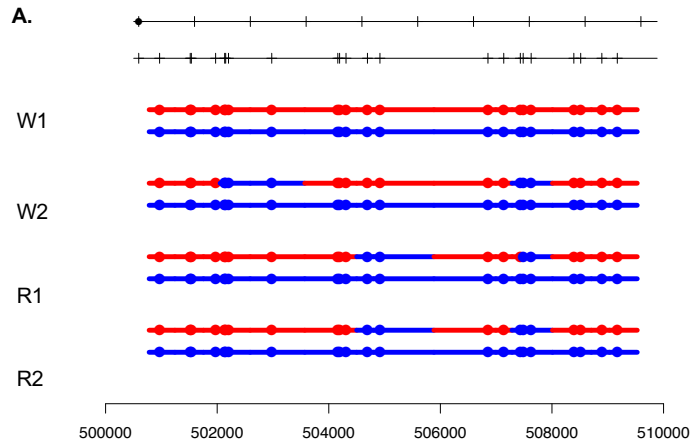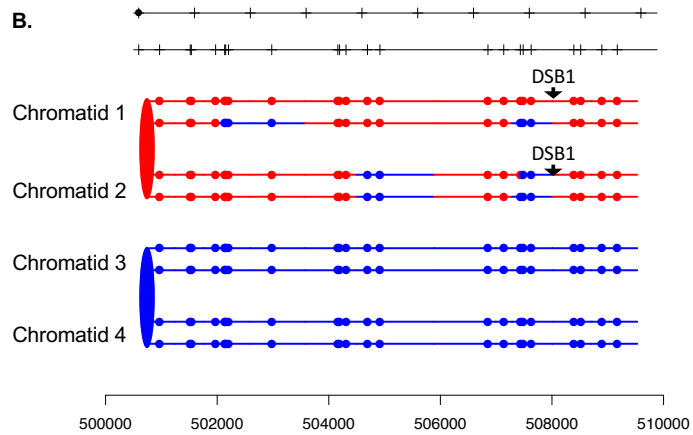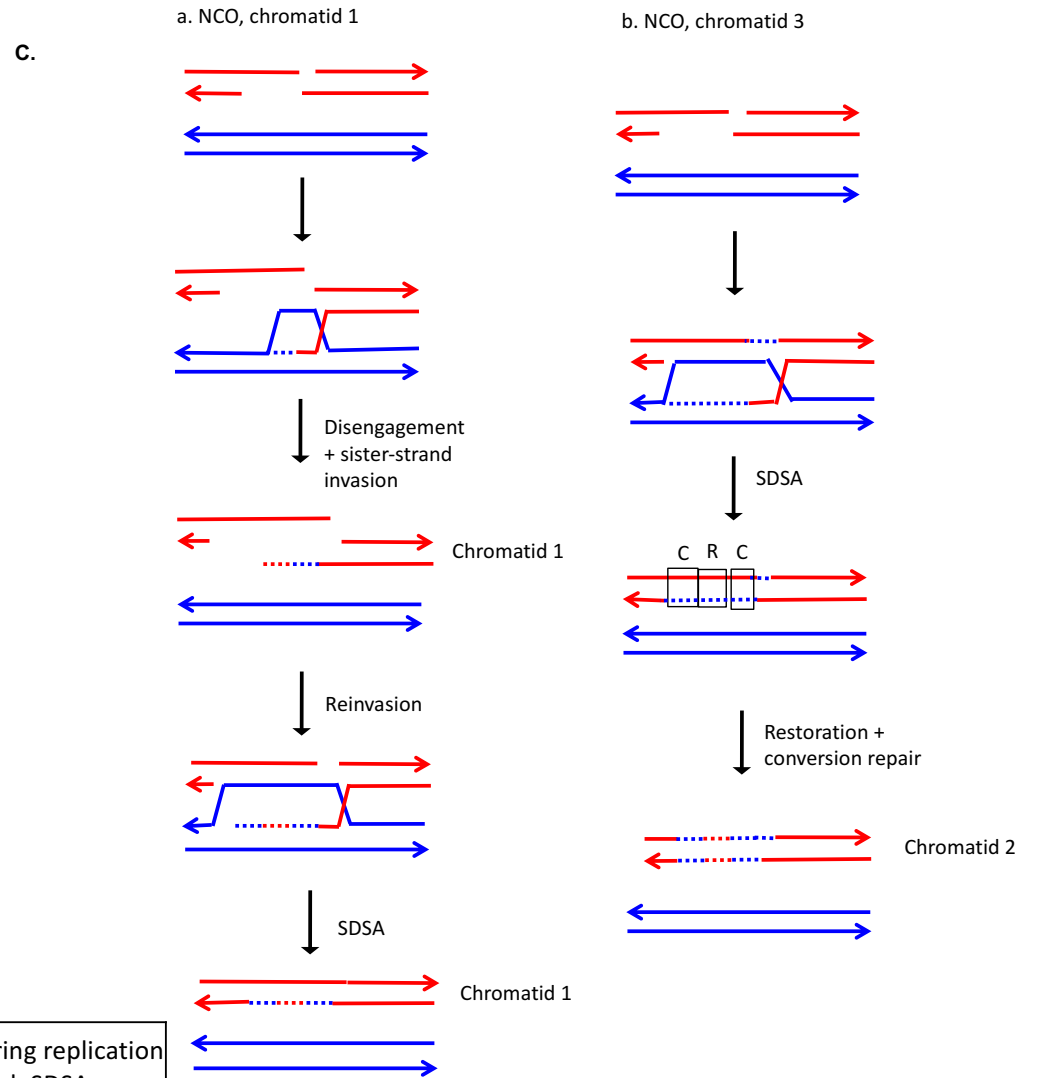

|     |      |                                                                               |                                                           |
|-----|------|-------------------------------------------------------------------------------|-----------------------------------------------------------|
| S44 | NCO1 | Chromatid 1 has heteroduplex region with long restoration tract in the middle | Template switch during replication to sister strand; SDSA |
|     | NCO2 | Chromatid 2 has mixture of homoduplex conversion and restoration tracts       | Mlh1-independent patchy MMR                               |

S45

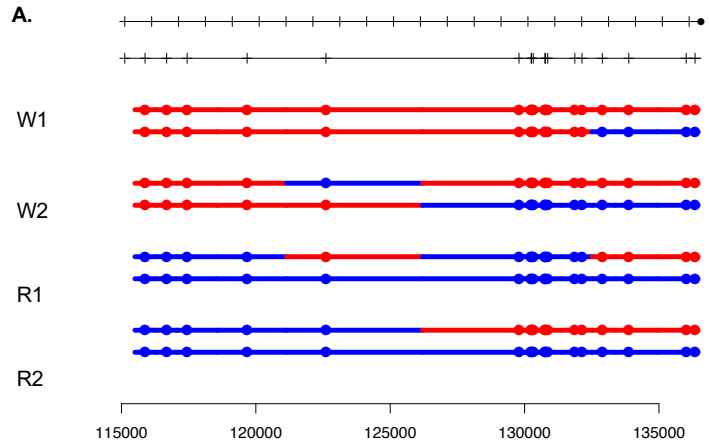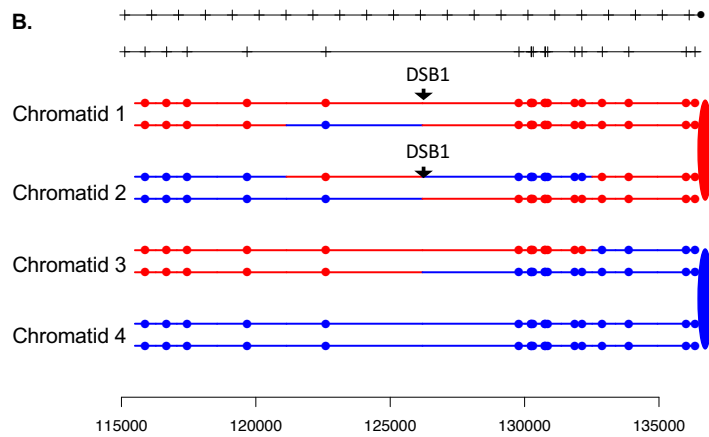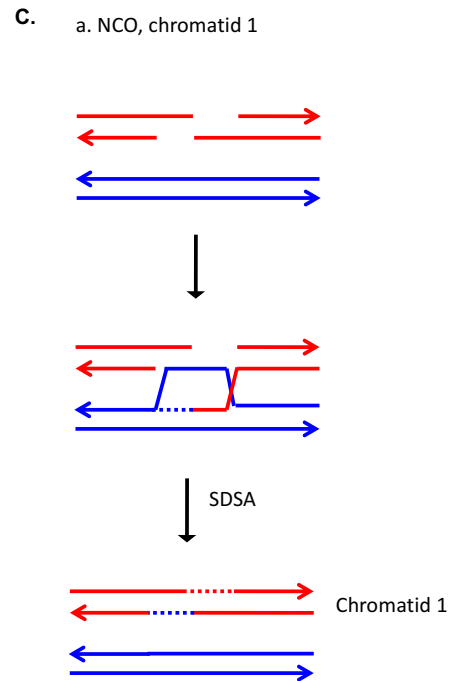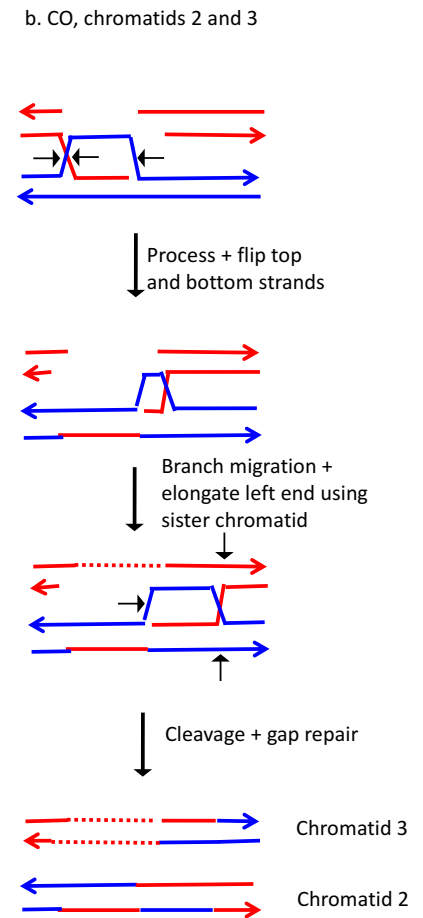

|     |     |                                                                                        |                                                           |
|-----|-----|----------------------------------------------------------------------------------------|-----------------------------------------------------------|
| S45 | NCO | Simple heteroduplex (chromatid 1)                                                      | SDSA                                                      |
|     | CO  | Regions of heteroduplex with switched strands on chromatid 3; symmetric heteroduplexes | Independent invasion of two broken ends; branch migration |

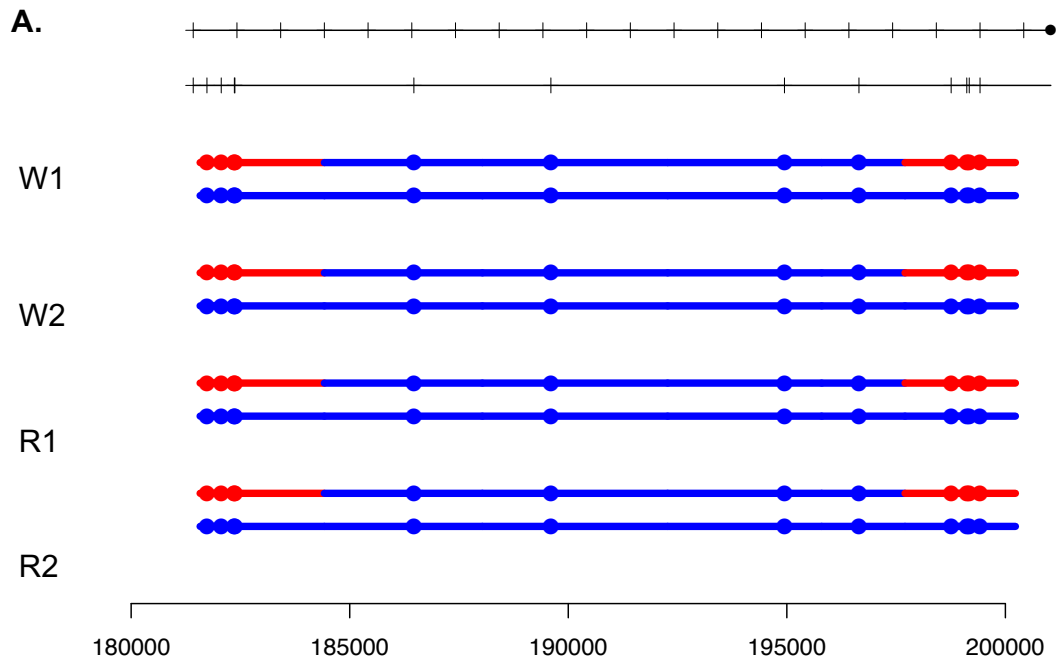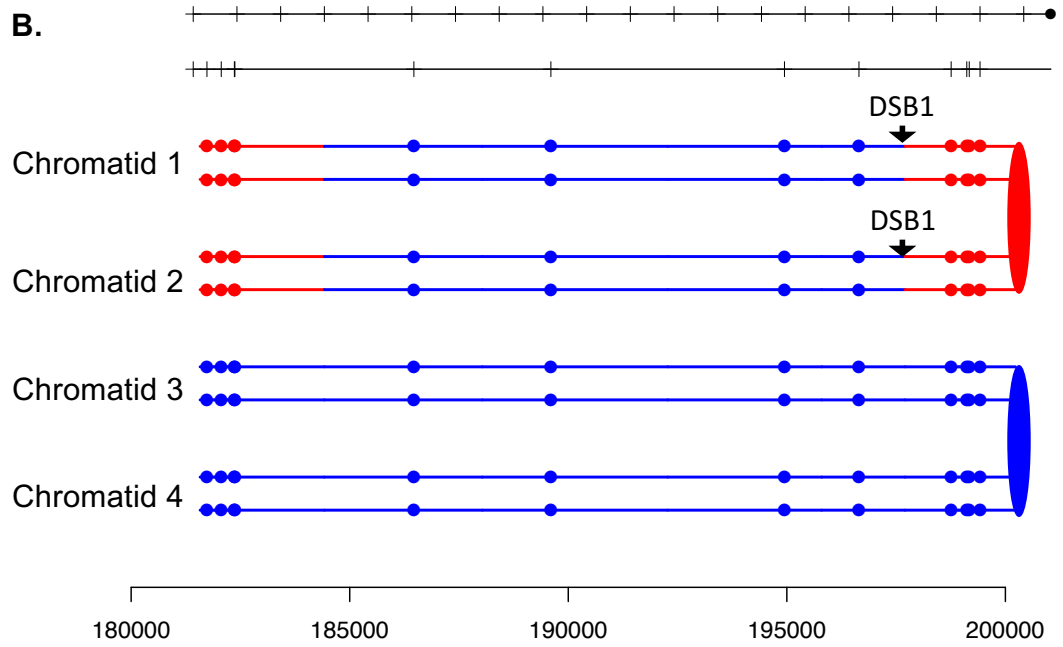

S47

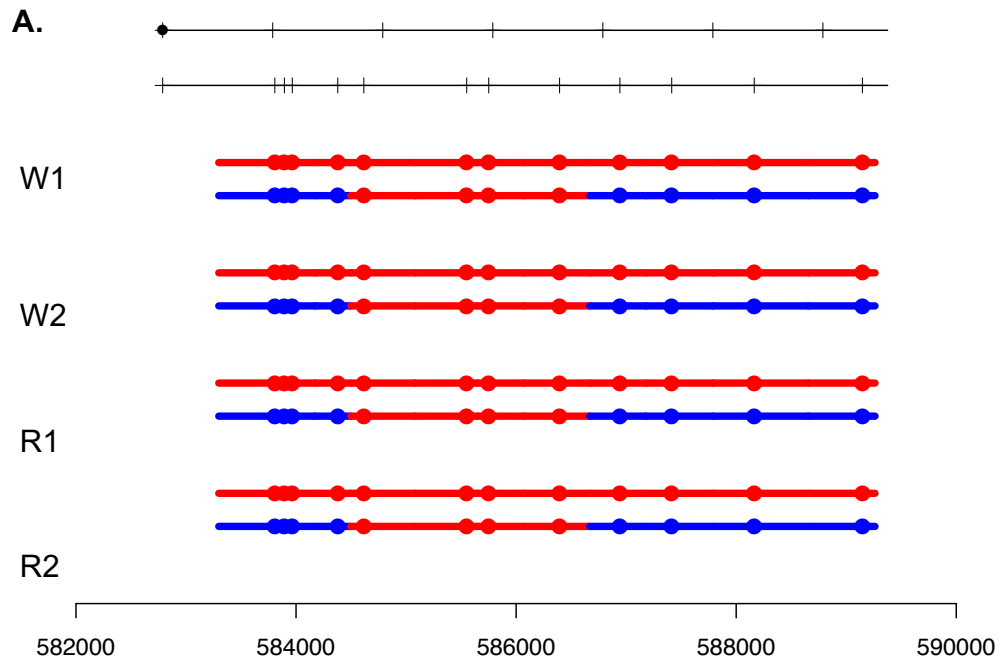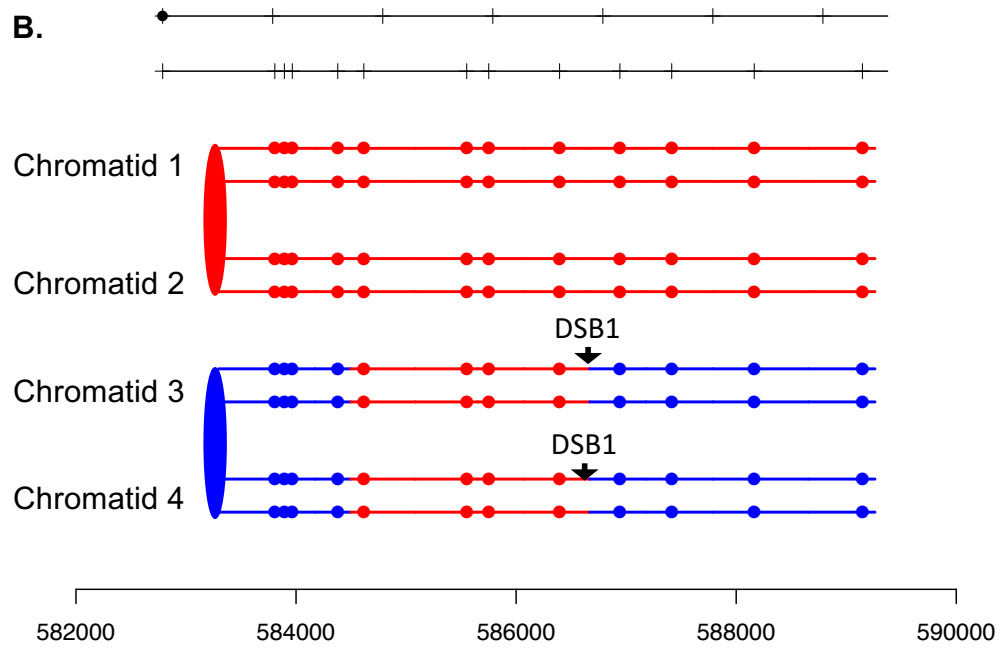

S48

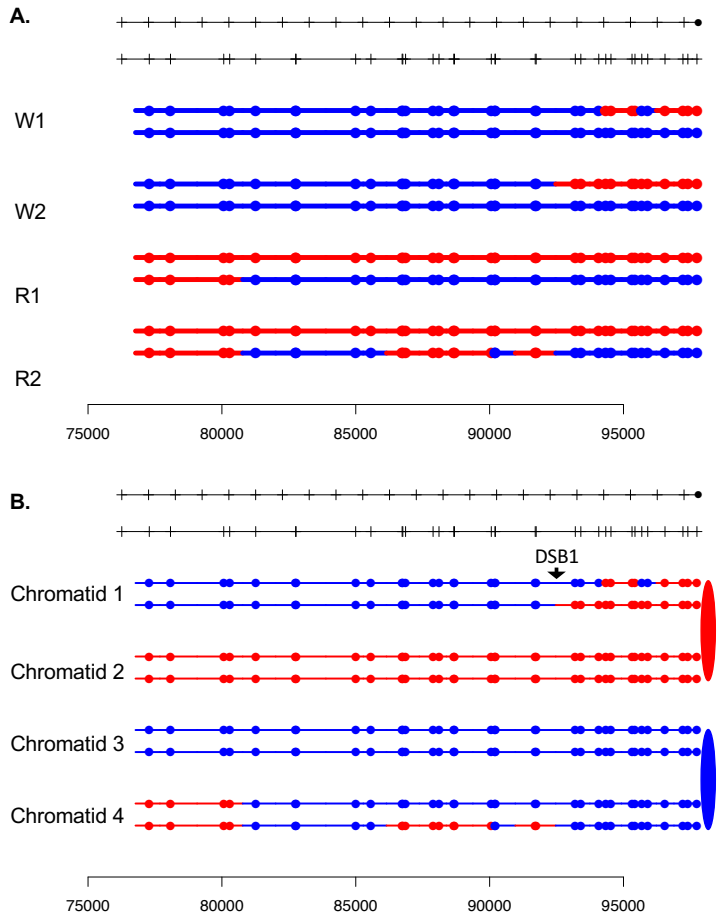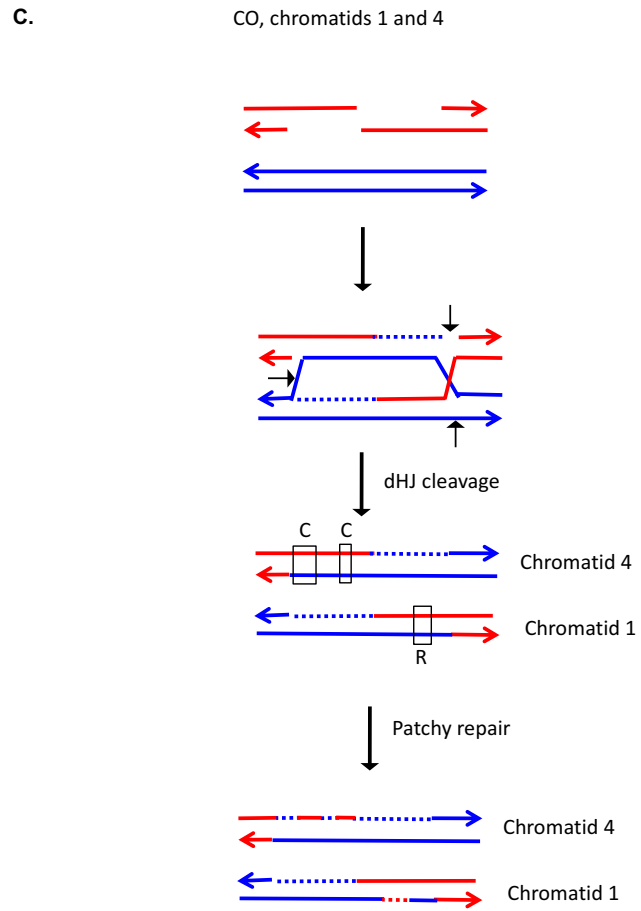

|     |    |                                                              |                             |
|-----|----|--------------------------------------------------------------|-----------------------------|
| S48 | CO | Regions of heteroduplex interspersed with homoduplex regions | Mlh1-independent patchy MMR |
|-----|----|--------------------------------------------------------------|-----------------------------|



S49

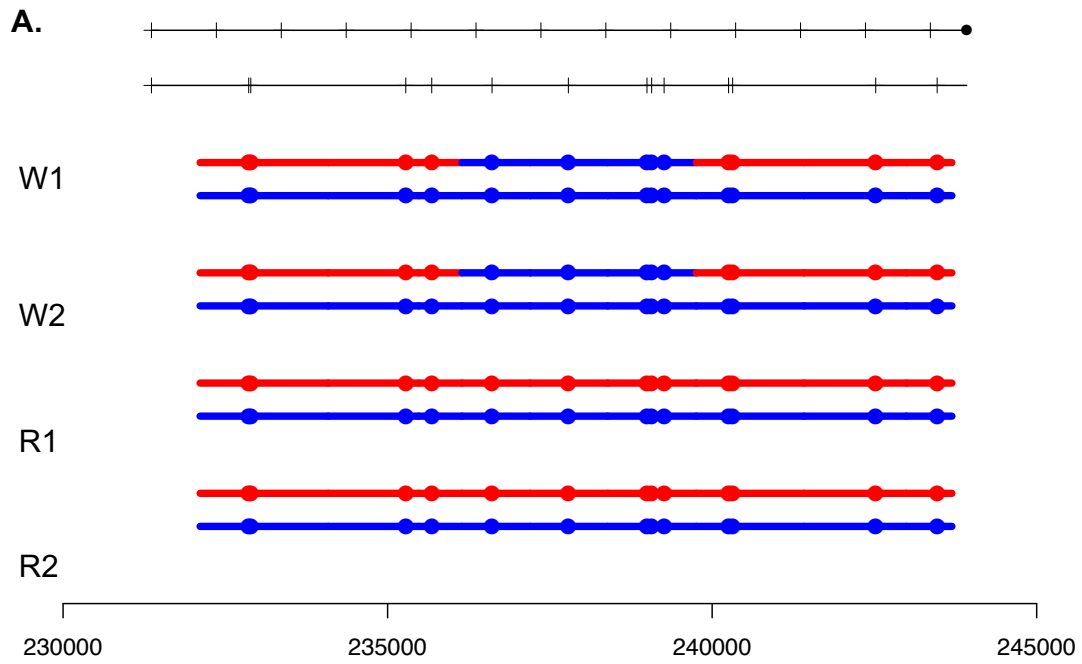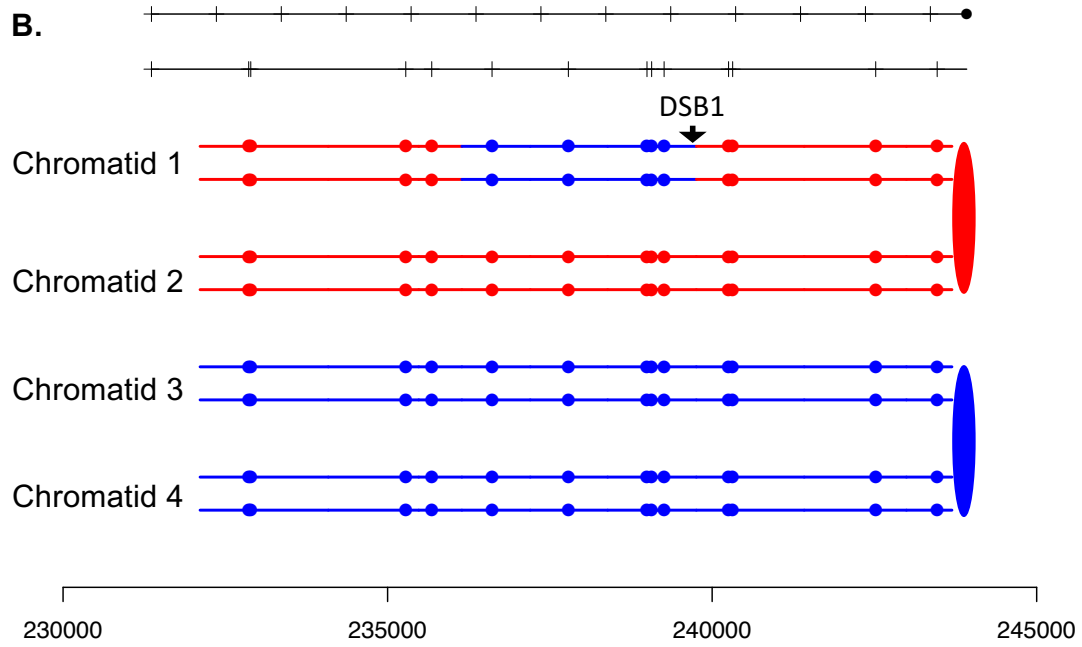

A.

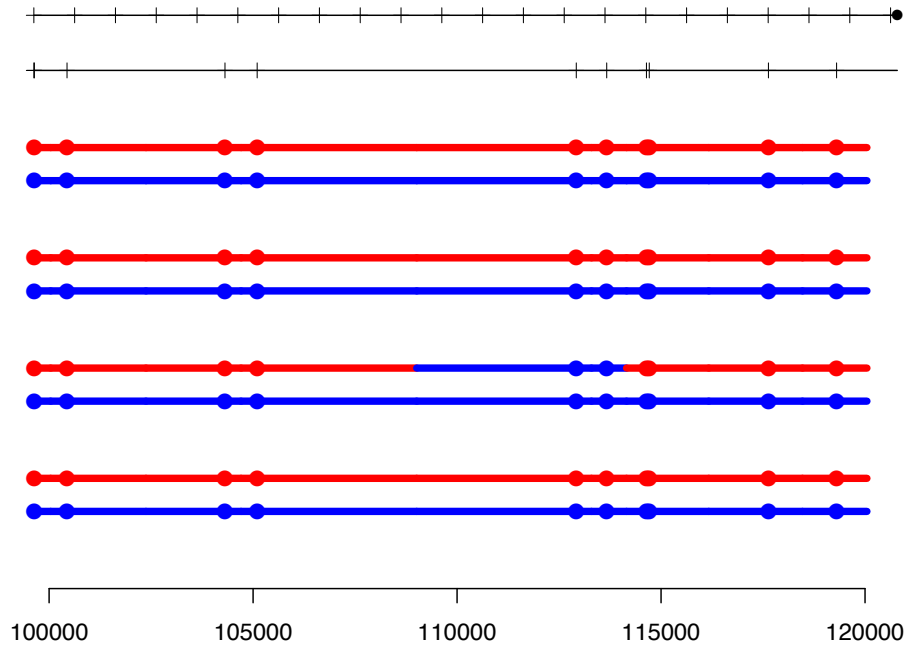

B.

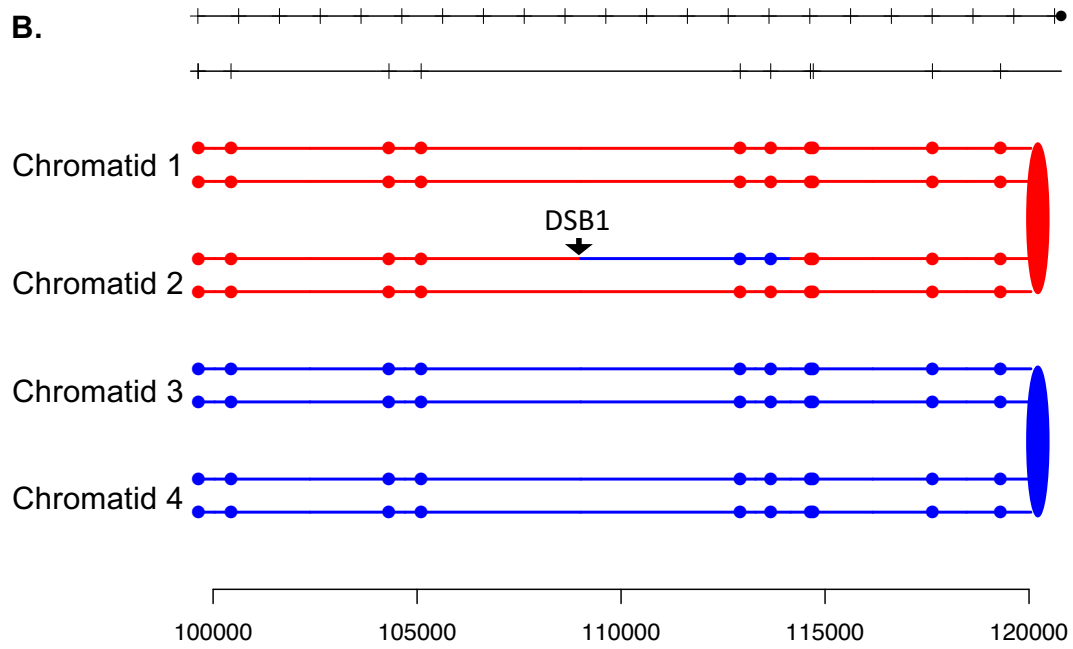

S51

A.

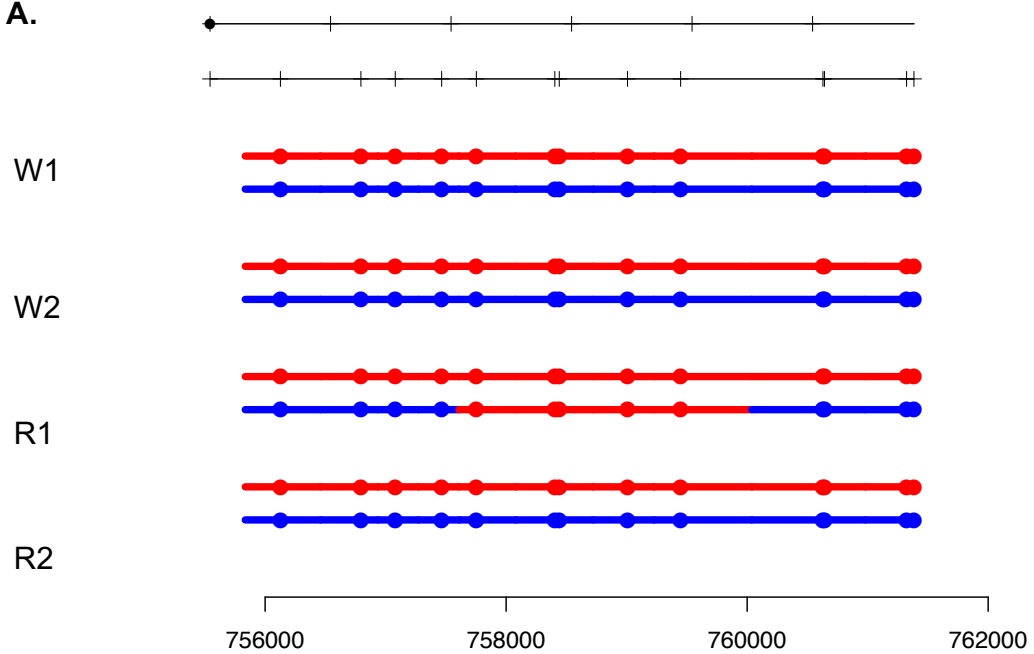

B.

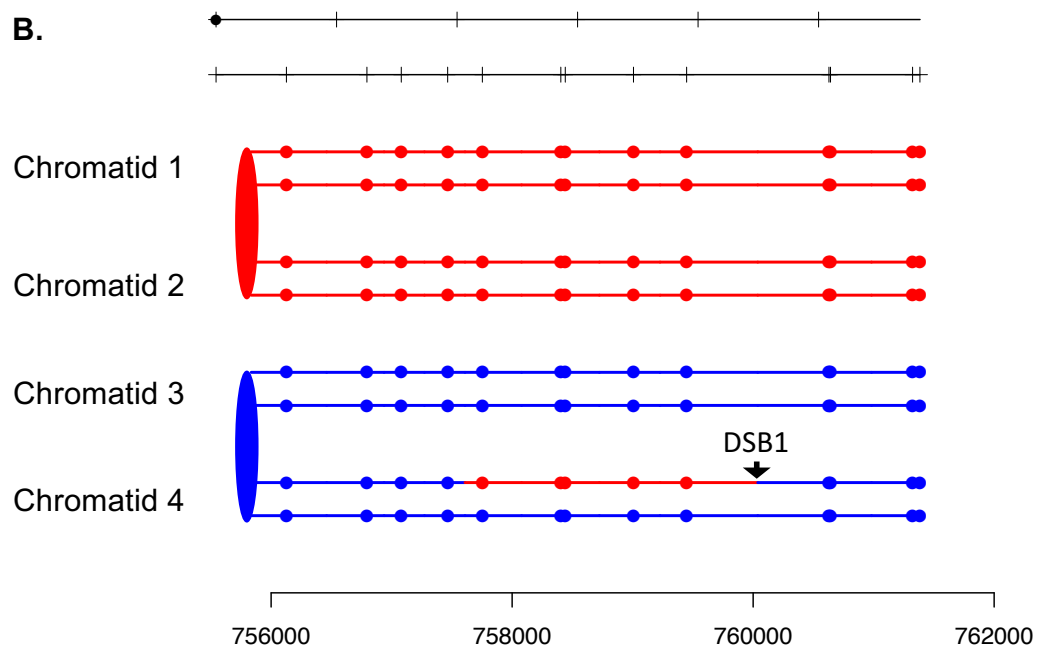

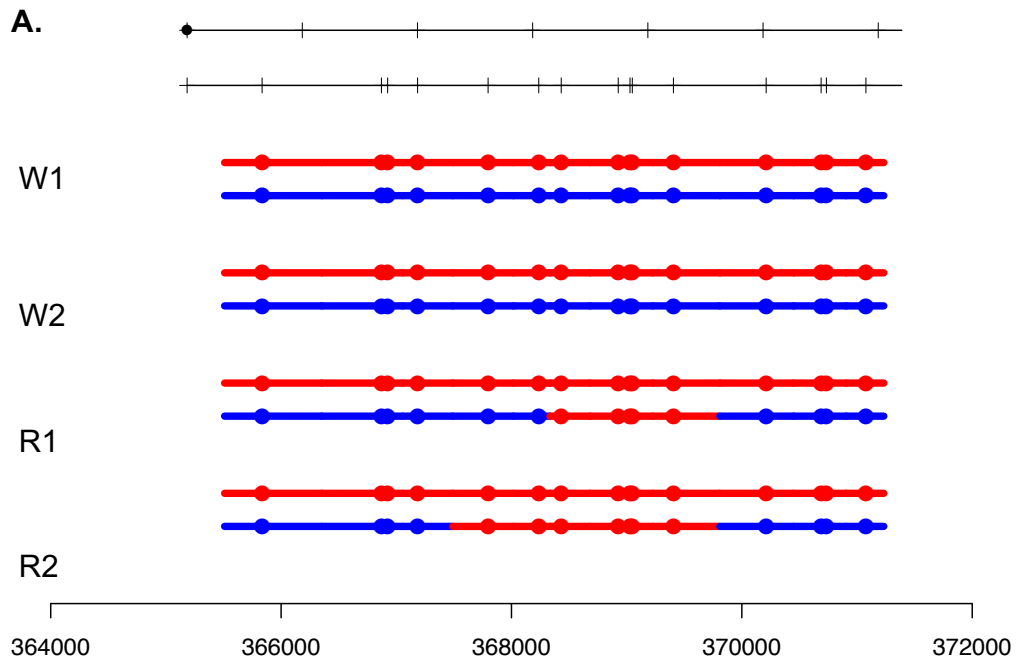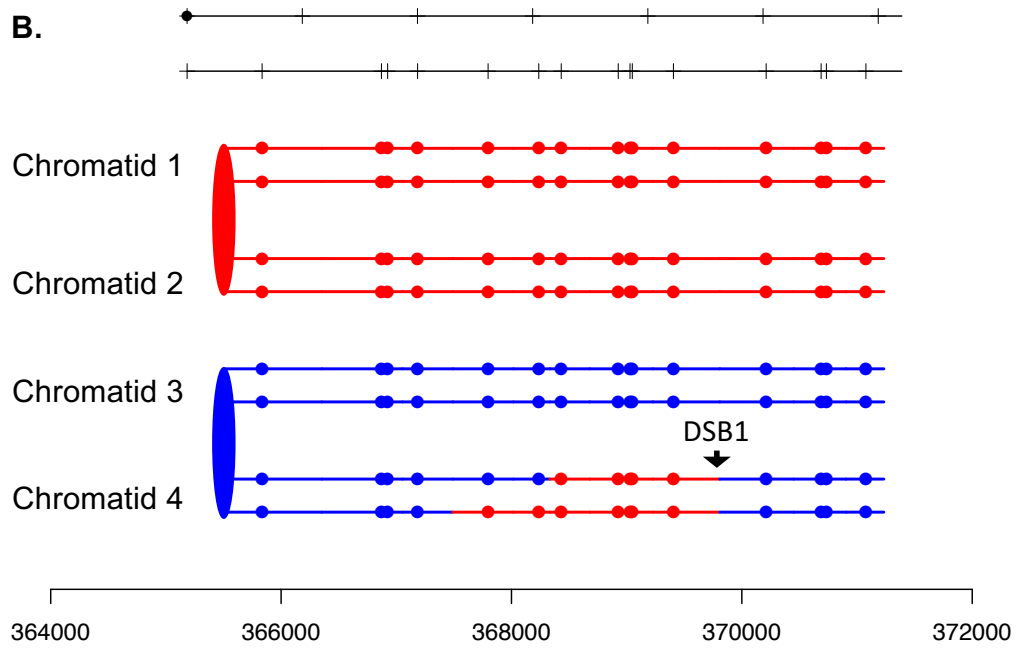

S53

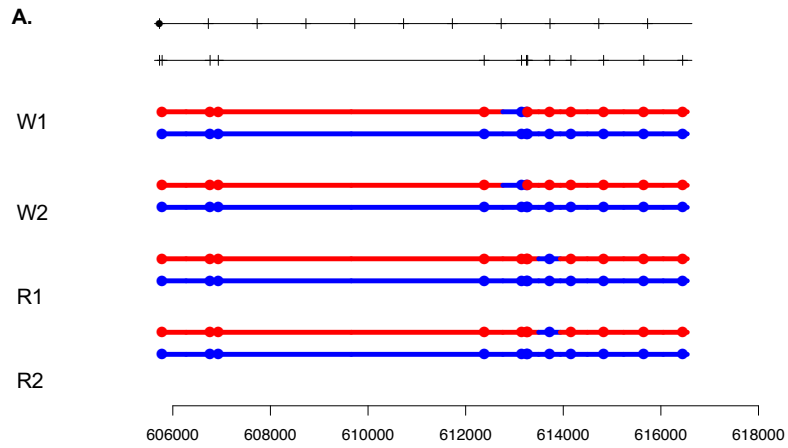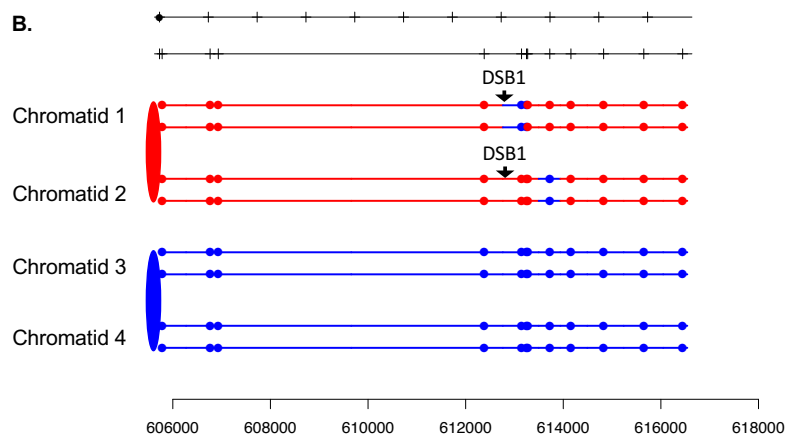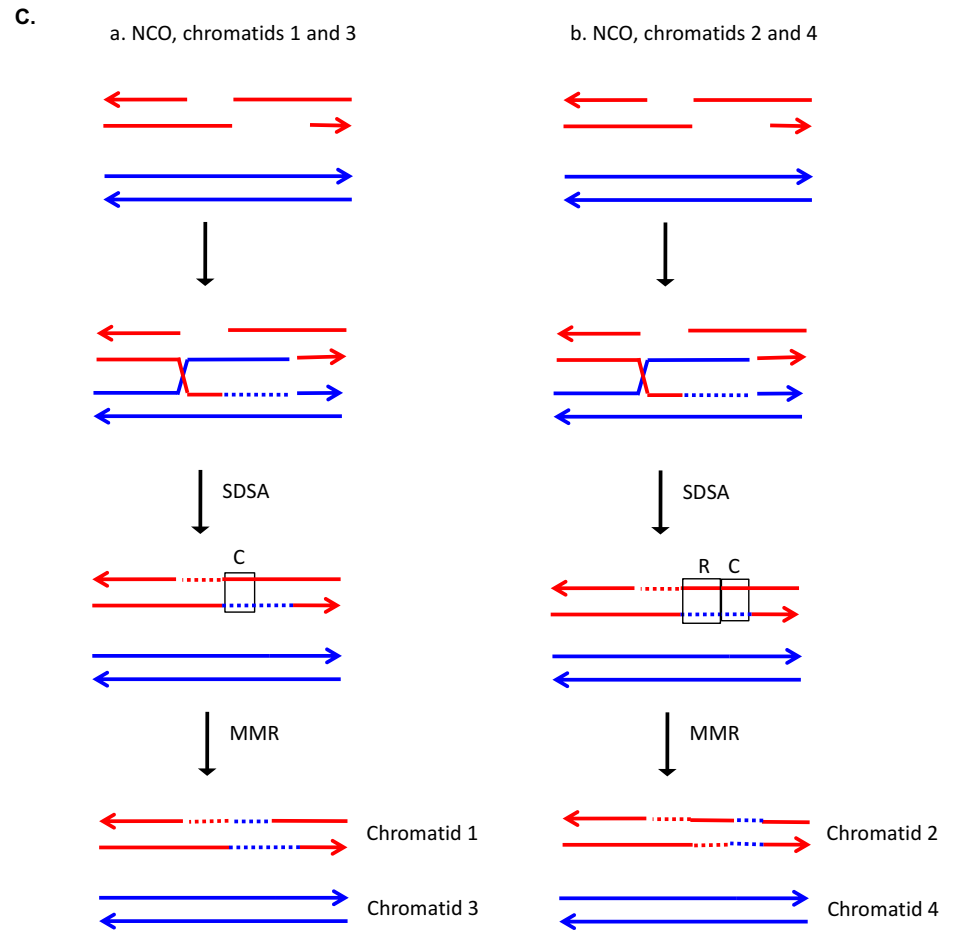

|     |      |                                                      |                             |
|-----|------|------------------------------------------------------|-----------------------------|
| S53 | NCO1 | Conversion tract with no heteroduplex in chromatid 1 | Mlh1-independent MMR        |
|     | NCO2 | Conversion and restoration tracts in chromatid 2     | Mlh1-independent patchy MMR |

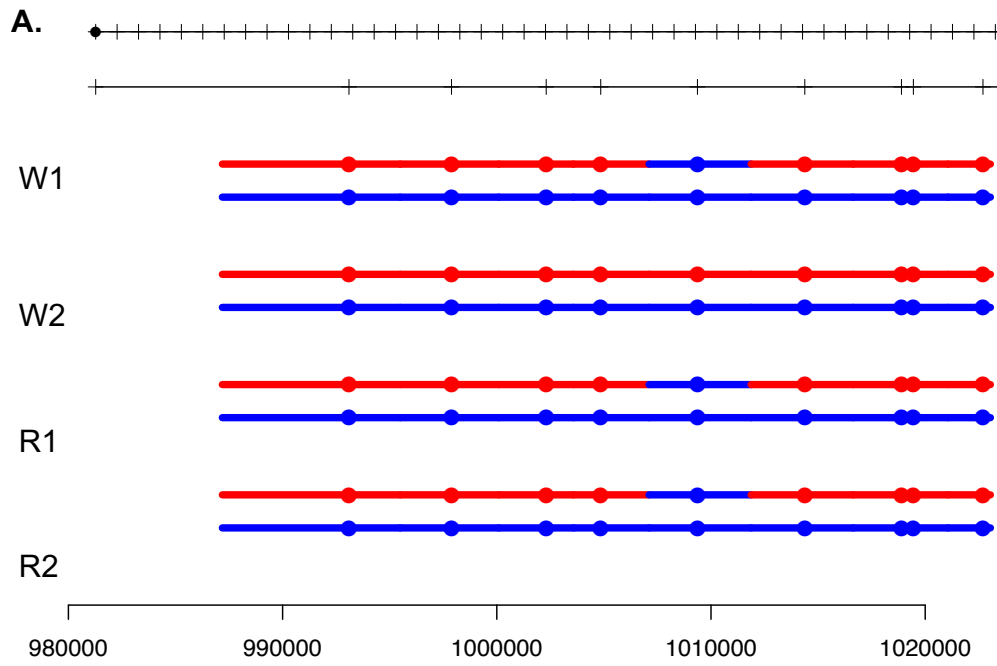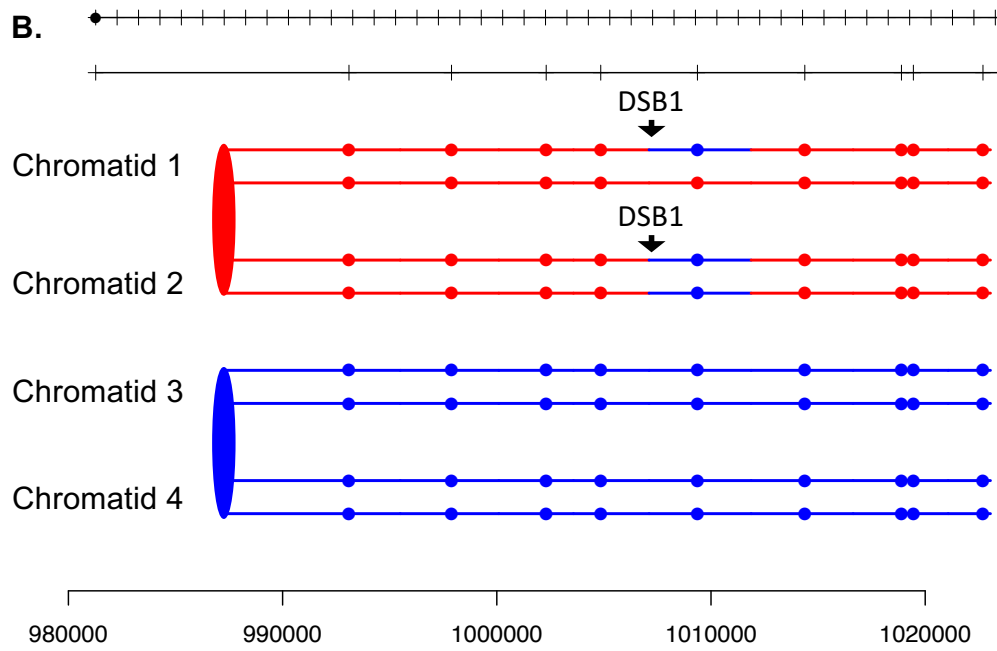

A.

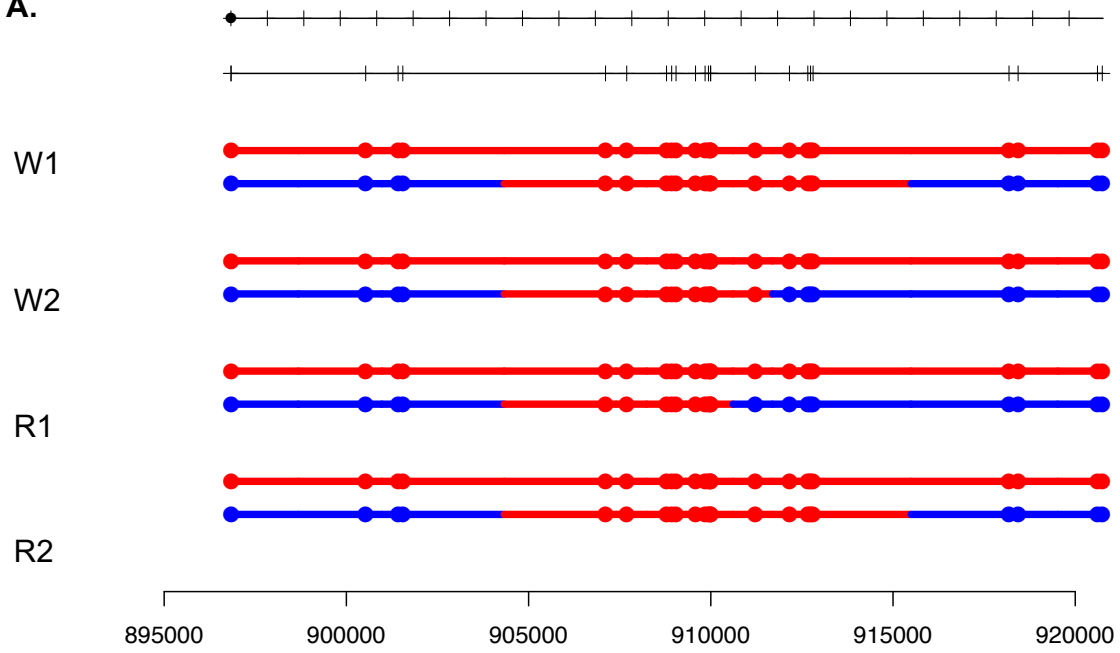

B.

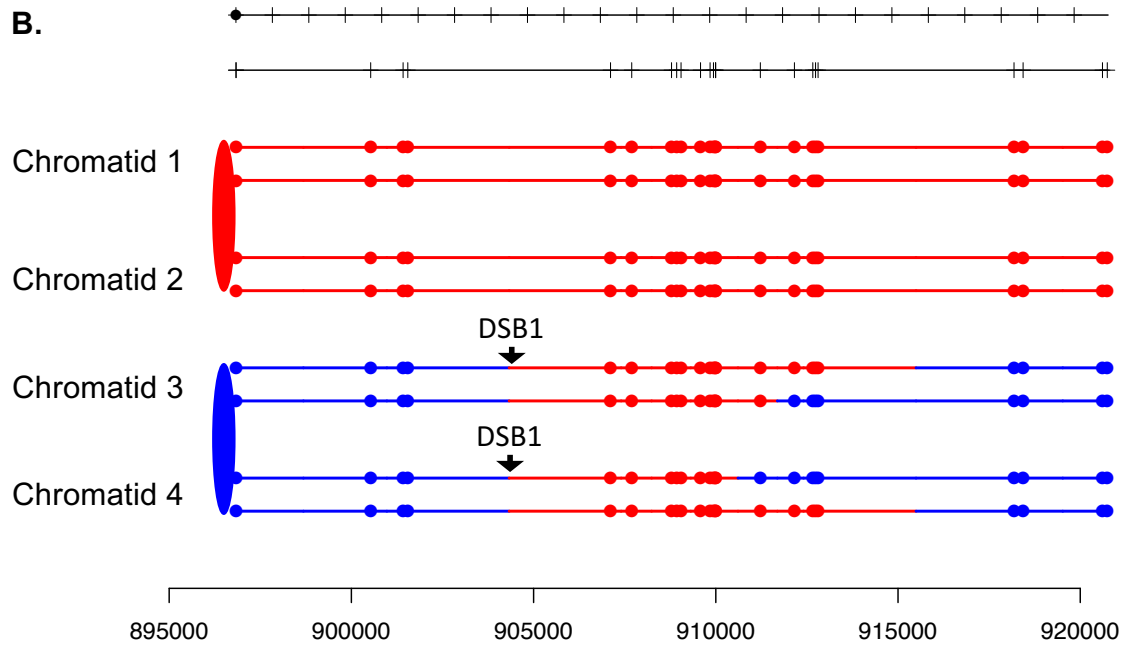

S56

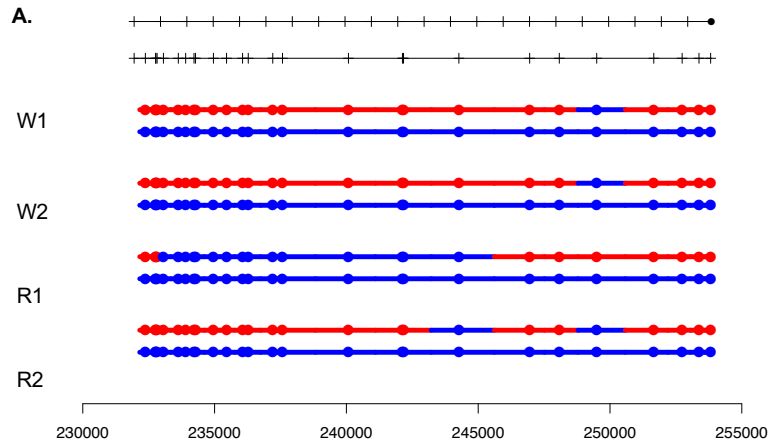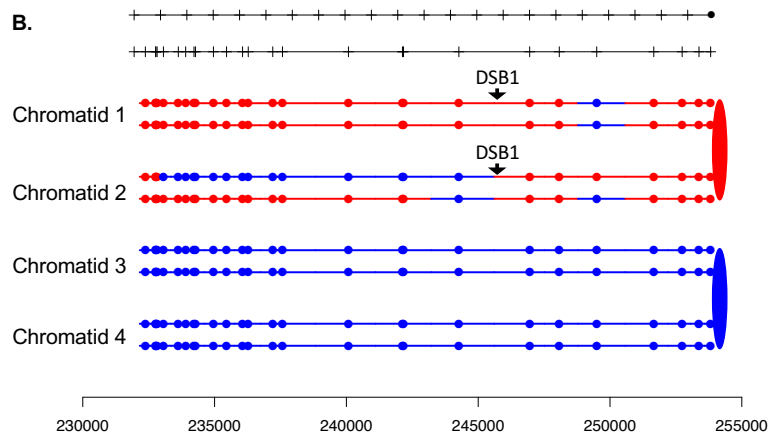

**C.** a. NCO, chromatid 1

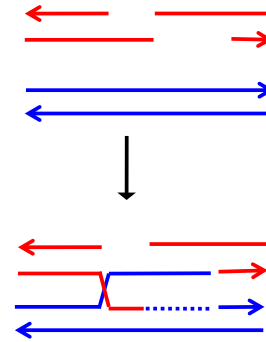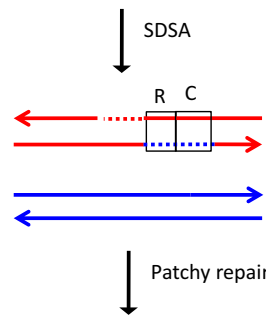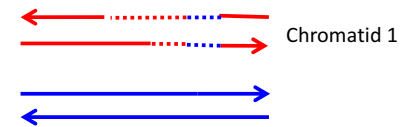

b. NCO, chromatid 2

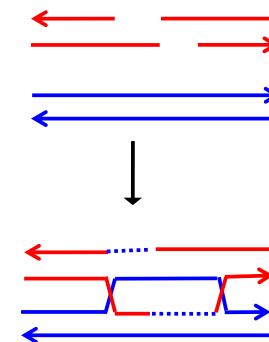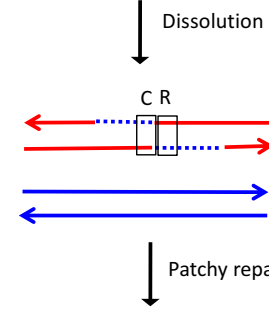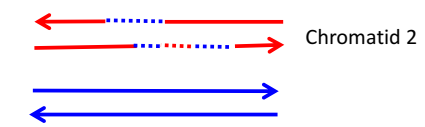

|     |      |                                                      |                             |
|-----|------|------------------------------------------------------|-----------------------------|
| S56 | NCO1 | Conversion tract with no heteroduplex in chromatid 1 | Mlh1-independent MMR        |
|     | NCO2 | Conversion and restoration tracts in chromatid 2     | Mlh1-independent patchy MMR |



A.

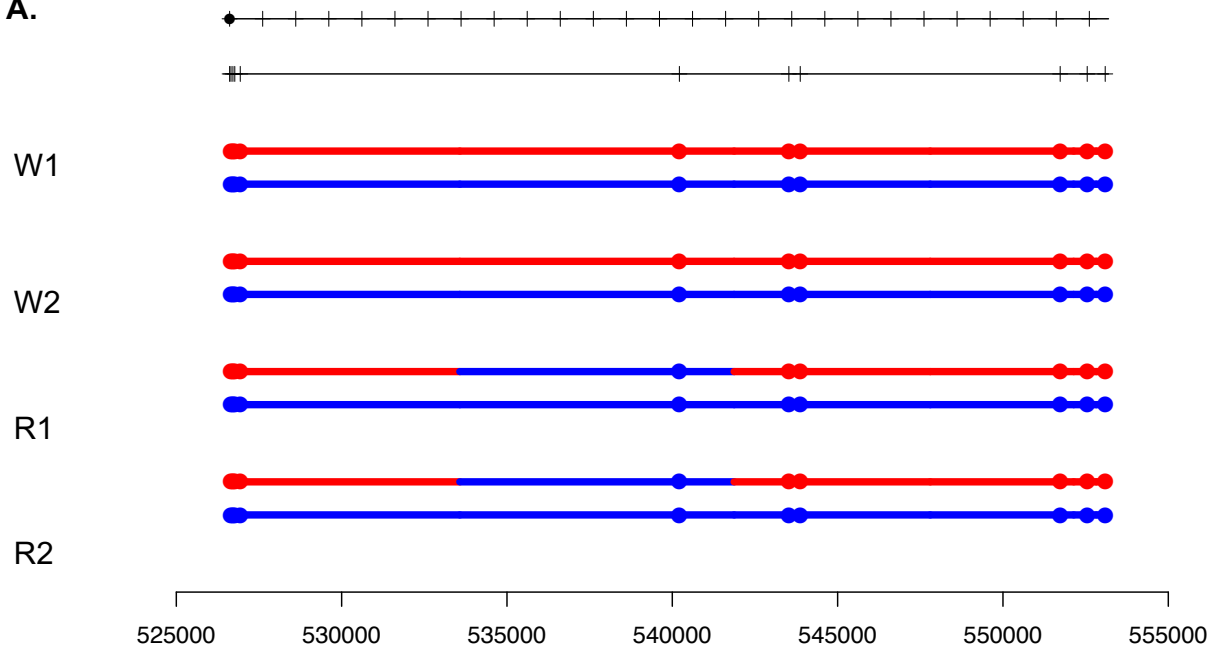

B.

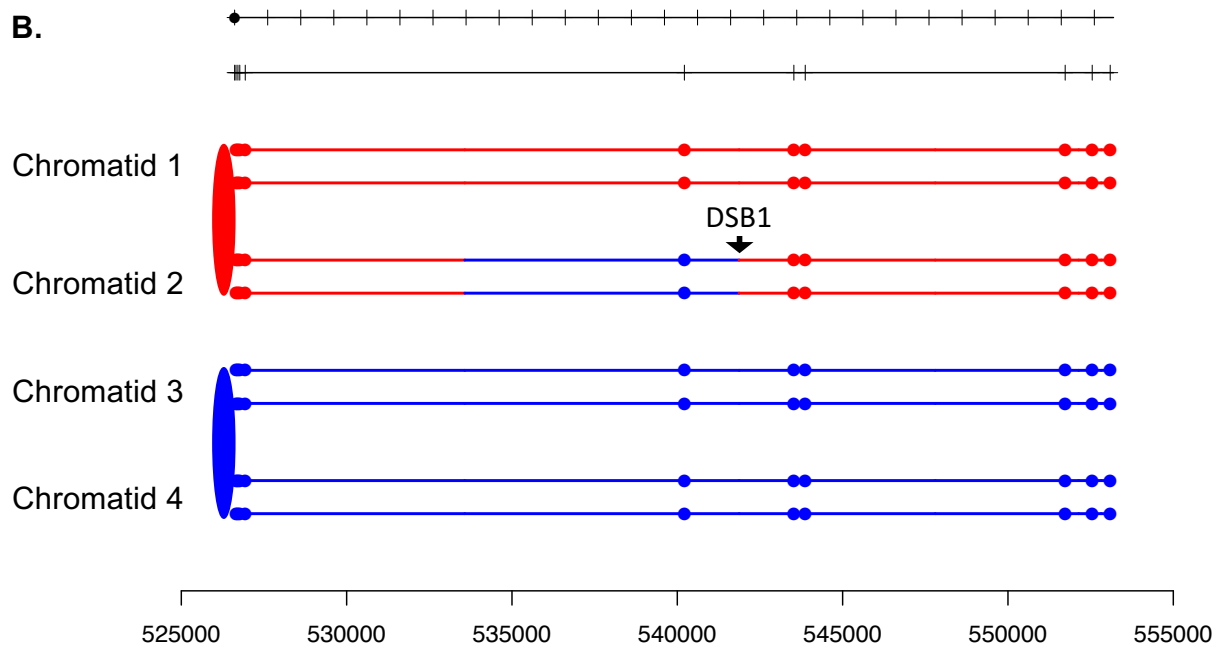

**A.**

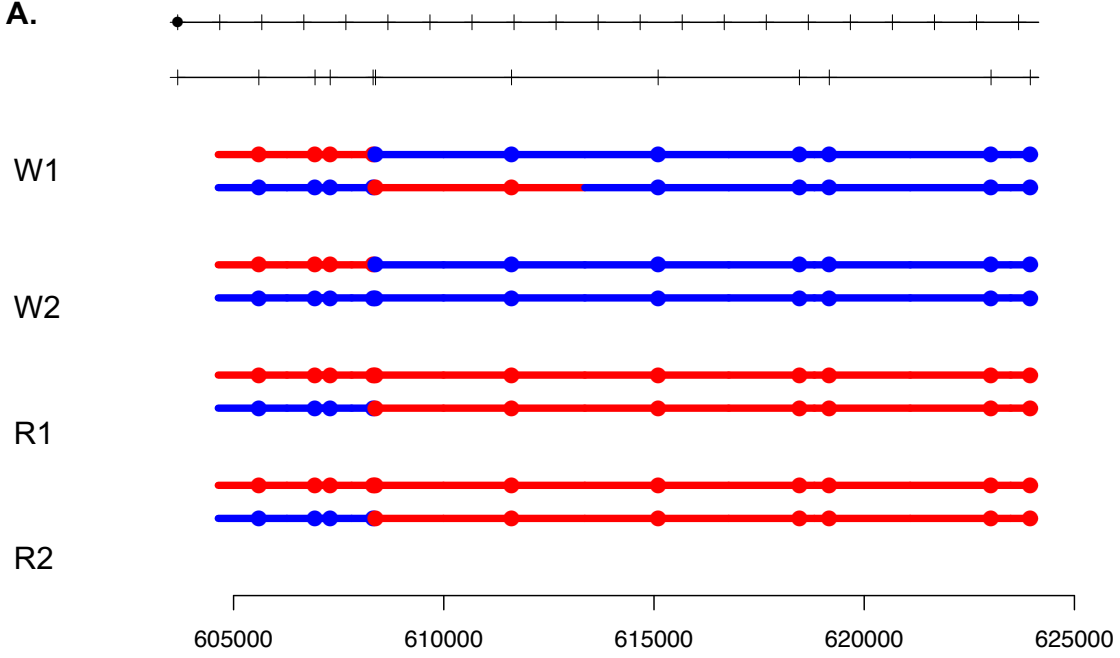

**B.**

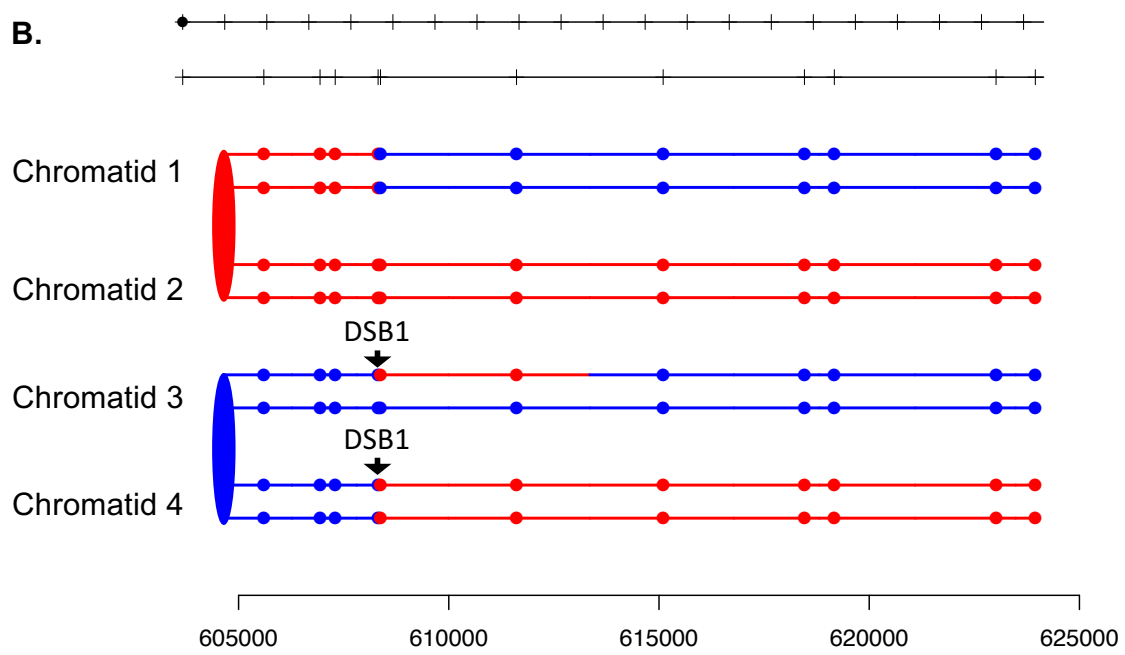

S59

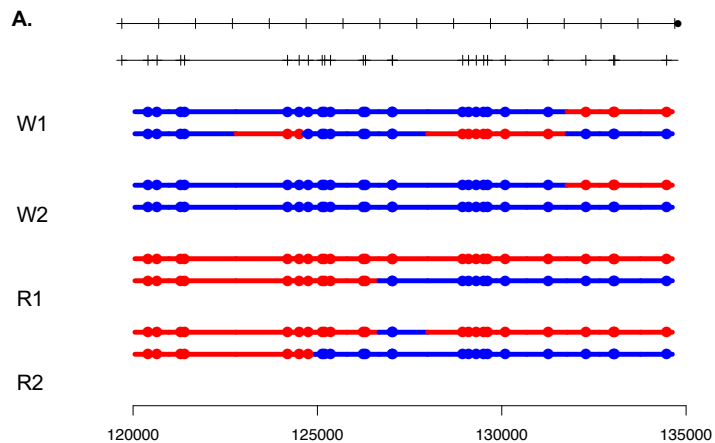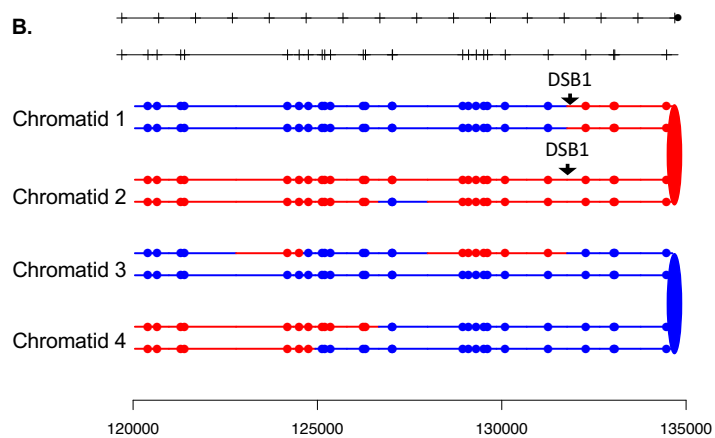

**C.**

a. CO, chromatids 1 and 4

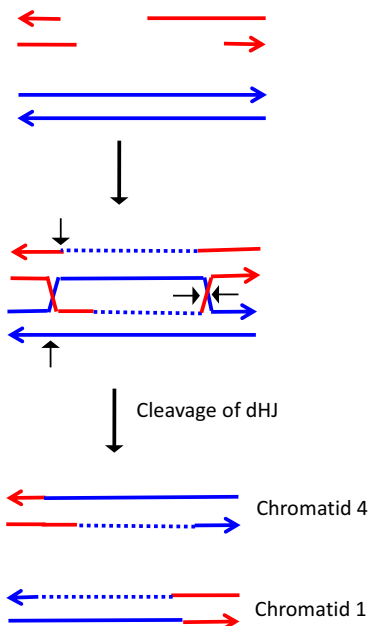

b. NCO, chromatids 2 and 3

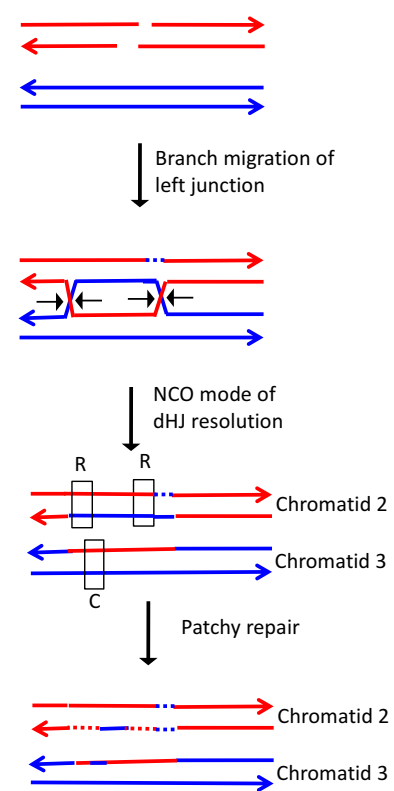

|     |     |                                                                                                            |                                                                         |
|-----|-----|------------------------------------------------------------------------------------------------------------|-------------------------------------------------------------------------|
| S59 | CO  | Long conversion tract between heteroduplex and putative DSB site on chromatid 4                            | Repair of double-stranded DNA gap                                       |
|     | NCO | Regions of conversion/restoration and heteroduplex on same side of putative DSB site in chromatids 3 and 4 | Branch migration; NCO resolution of dHJ; Mlh1-independent patchy repair |

S60

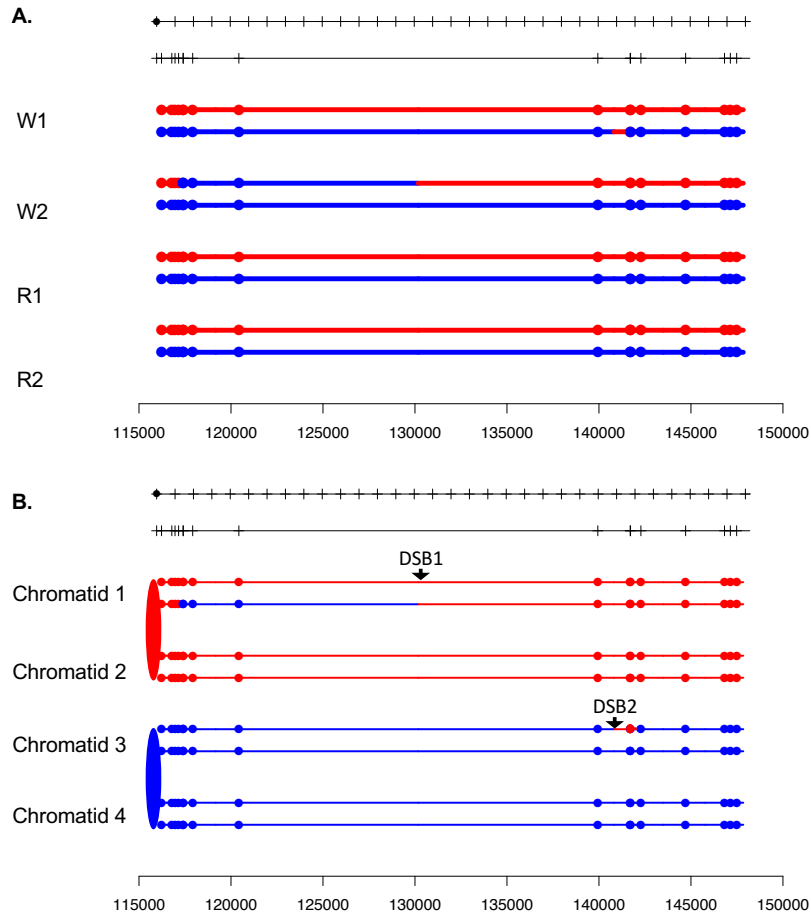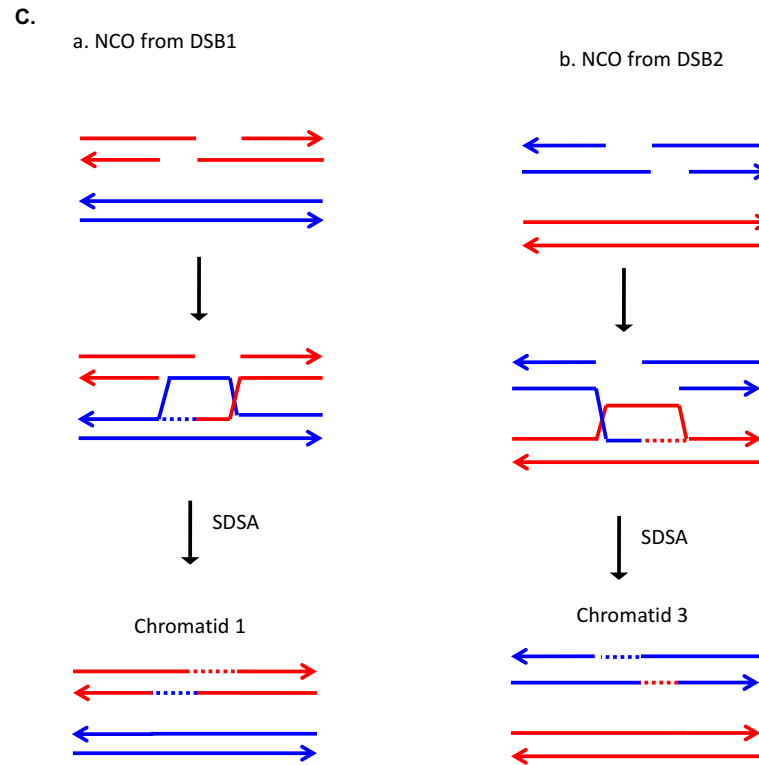

|     |      |                                             |      |
|-----|------|---------------------------------------------|------|
| S60 | NCO1 | Simple heteroduplex. DSB on red chromatid.  | SDSA |
|     | NCO2 | Simple heteroduplex. DSB on blue chromatid. | SDSA |

S61

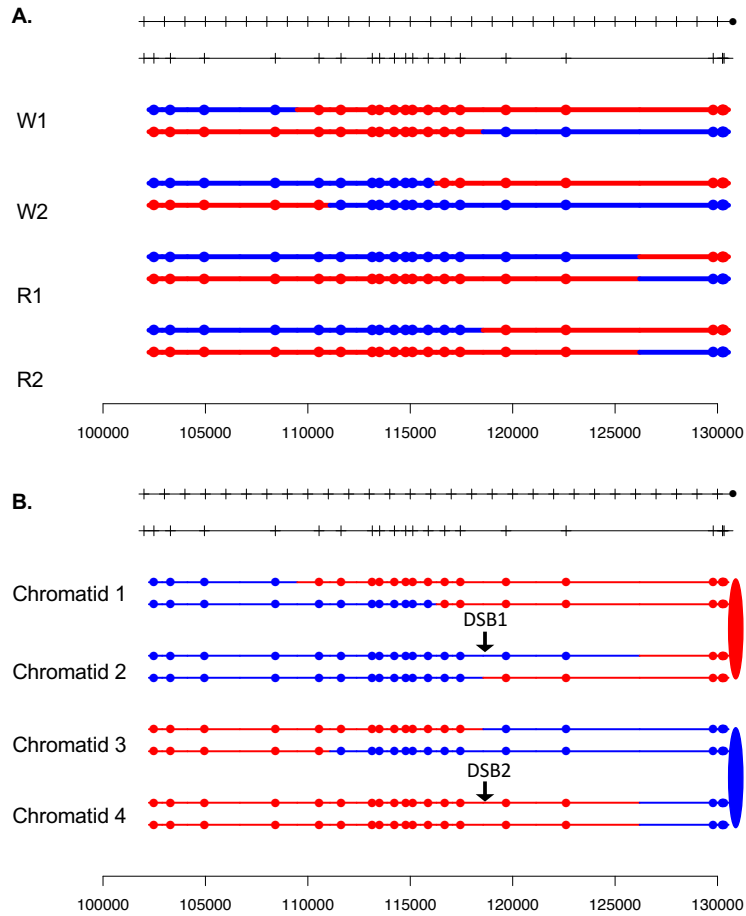

**C.**

a. CO of chromatids 2 and 3.

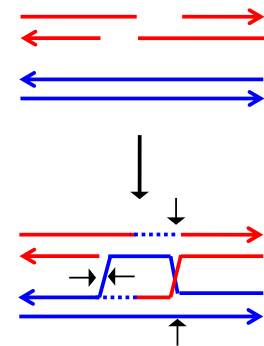

Processing of dHJ in CO mode

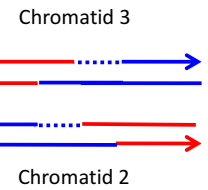

b. CO, chromatids 1 and 4.

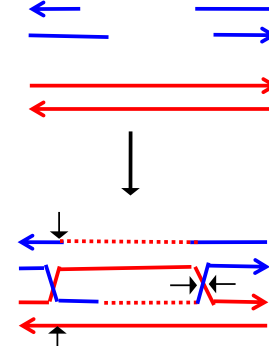

Processing of dHJ in CO mode

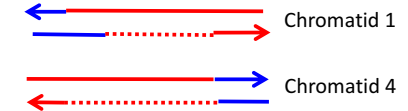

|     |     |                                                                                        |                                                                              |
|-----|-----|----------------------------------------------------------------------------------------|------------------------------------------------------------------------------|
| S61 | CO1 | Uni-directional heteroduplexes on chromatids 2 and 3 propagated in opposite directions | Crossover by standard DSBR model                                             |
|     | CO2 | DSB on blue chromatid, large conversion tract                                          | Repair of double-stranded DNA gap; followed by cleavage of dHJ to yield a CO |

S62

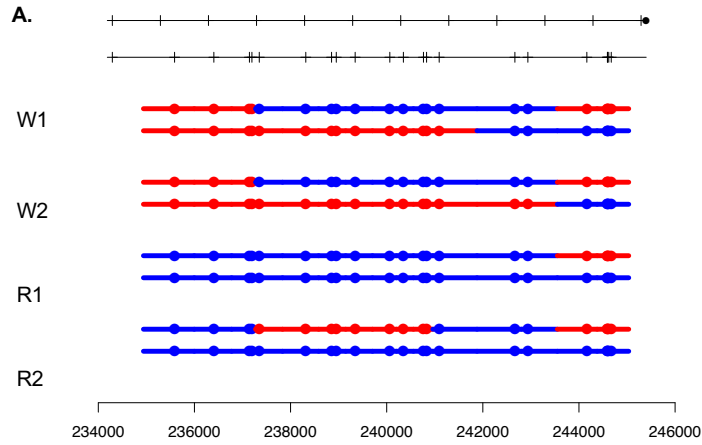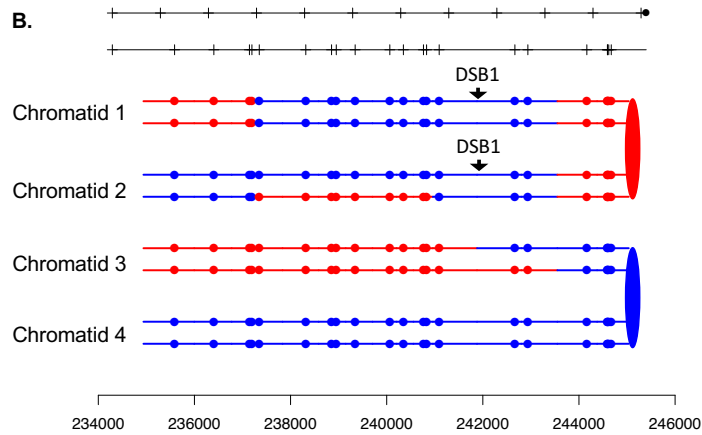

**C.**

a. NCO, chromatids 1 and 4

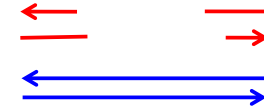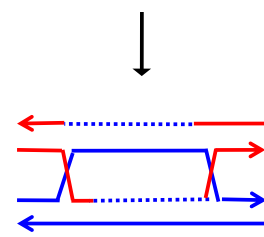

Dissolution

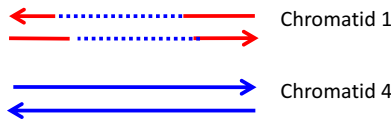

b. CO, chromatids 2 and 3

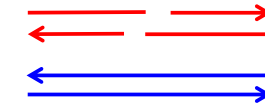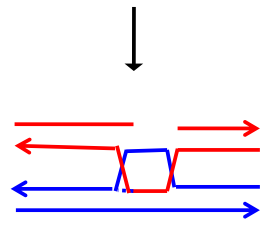

Branch migration of left junction

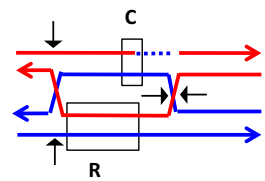

CO mode of dHJ resolution + patchy repair

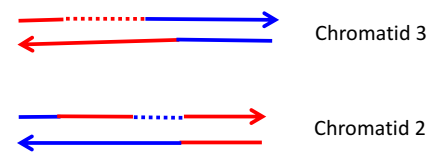

|     |     |                                                                                                                                         |                                                |
|-----|-----|-----------------------------------------------------------------------------------------------------------------------------------------|------------------------------------------------|
| S62 | NCO | Conversion tract spanning putative DSB site in chromatid 1                                                                              | Repair of double-stranded DNA gap; dissolution |
|     | CO  | Uni-directional heteroduplexes on chromatids 2 and 3; propagated in opposite directions; interspersed conversion and restoration tracts | Mlh1-independent MMR                           |

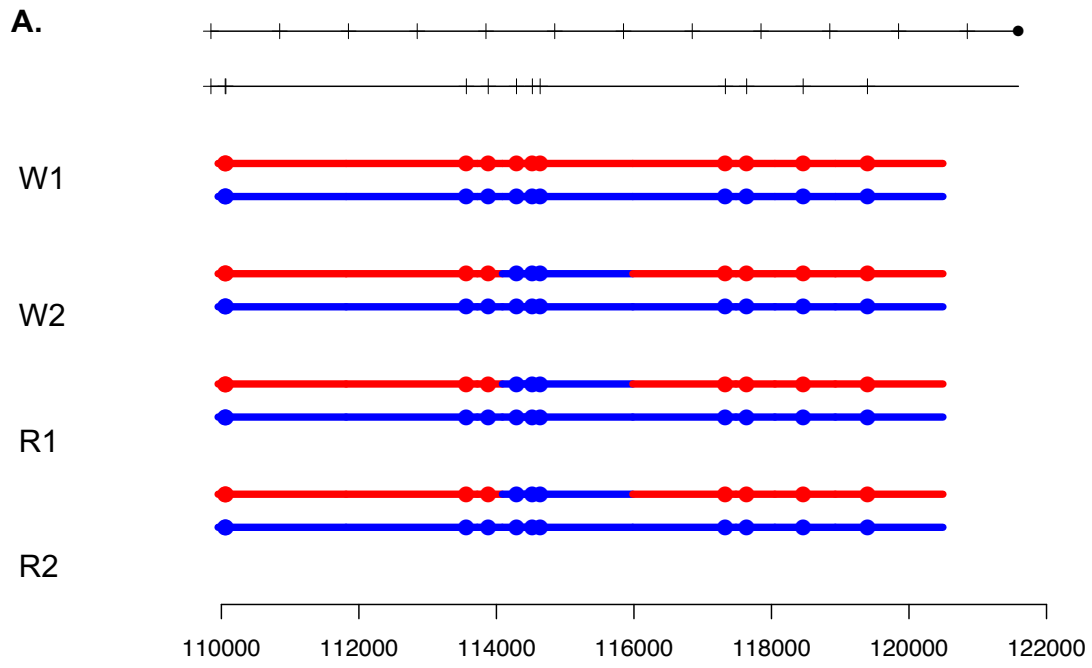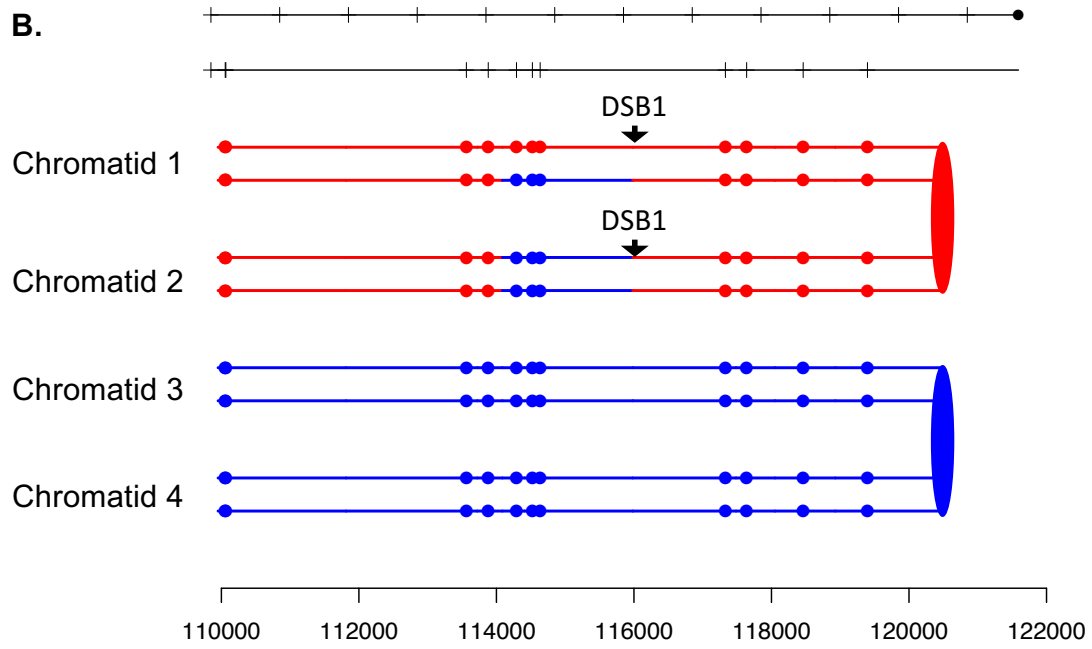

# S64

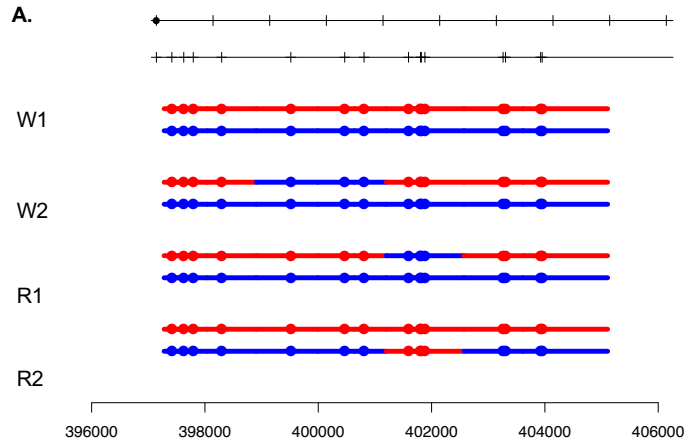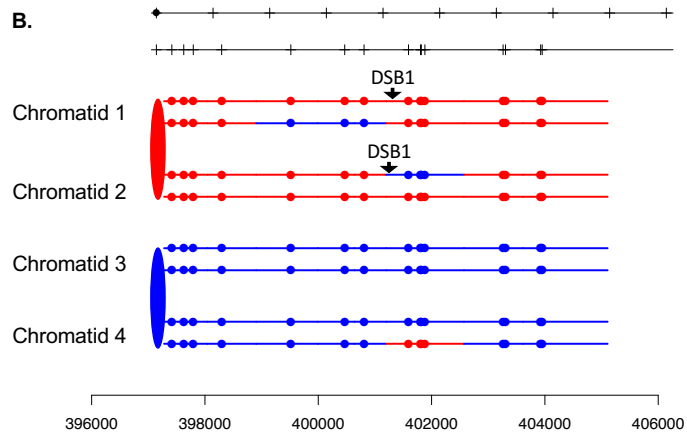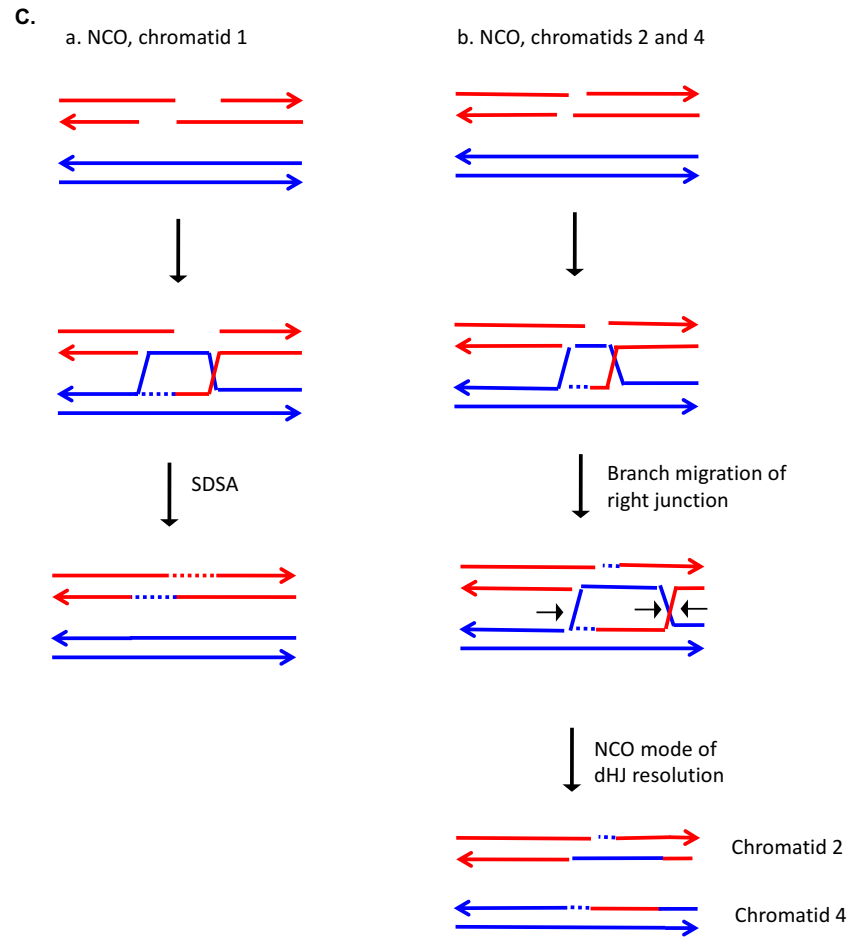

|     |      |                                                          |                                              |
|-----|------|----------------------------------------------------------|----------------------------------------------|
| S64 | NCO1 | Simple heteroduplex (chromatid 1)                        | SDSA                                         |
|     | NCO2 | Heteroduplexes on same side of DSB in chromatids 2 and 4 | Branch migration; NCO mode of dHJ resolution |



S65

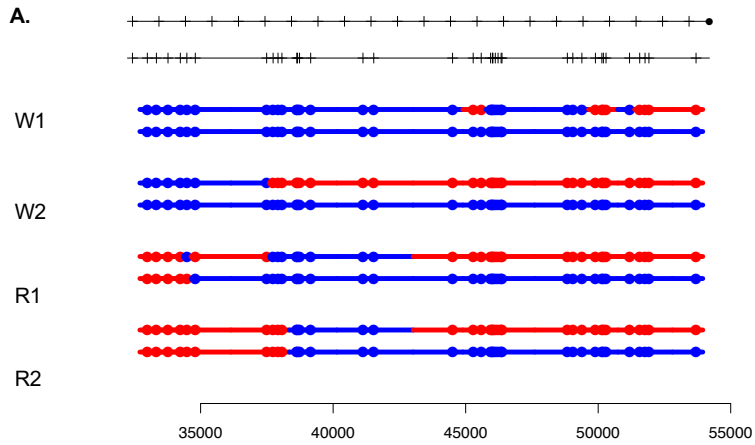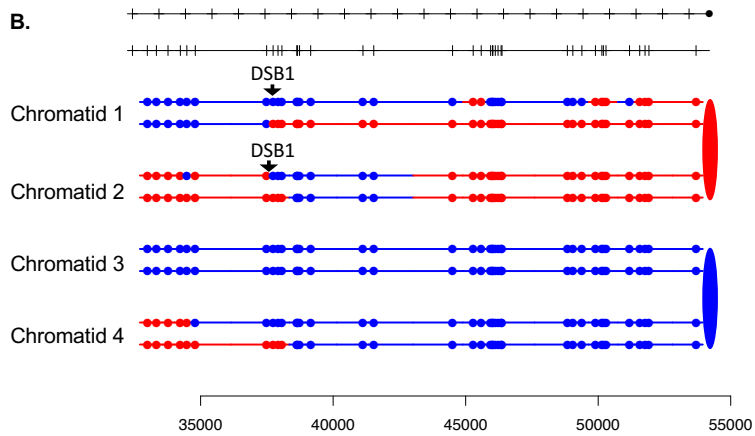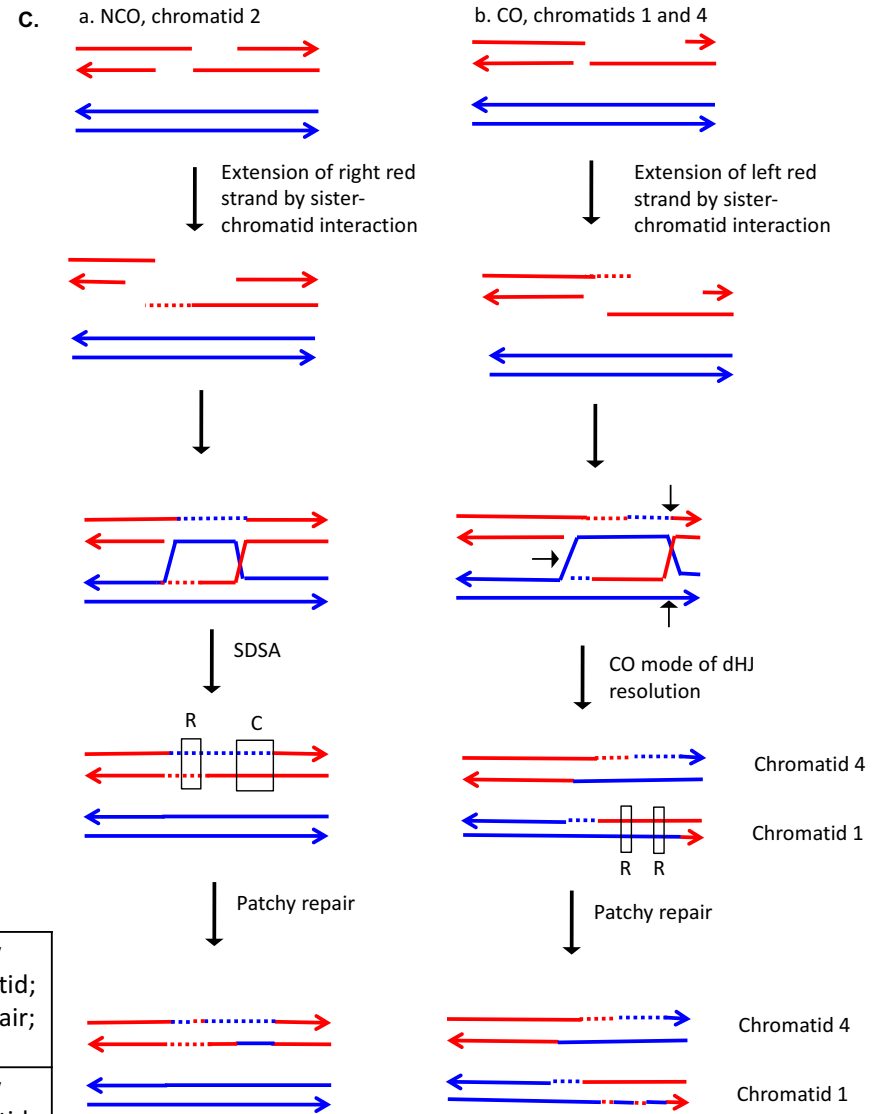

|     |     |                                                                                                                                                                   |                                                                                                                    |
|-----|-----|-------------------------------------------------------------------------------------------------------------------------------------------------------------------|--------------------------------------------------------------------------------------------------------------------|
| S65 | CO  | Heteroduplex on same side of DSB site in chromatids 1 and 4; heteroduplex spans DSB site in chromatid 4; tracts of restoration within heteroduplex in chromatid 2 | Extension of broken end by interaction with sister chromatid; Mlh1-independent patchy repair; CO resolution of dHJ |
|     | NCO | Heteroduplex spans DSB site in chromatid 2; tracts of conversion and restoration interspersed with heteroduplex regions                                           | Extension of broken end by interaction with sister chromatid; Mlh1-independent patchy repair; SDSA                 |

S66

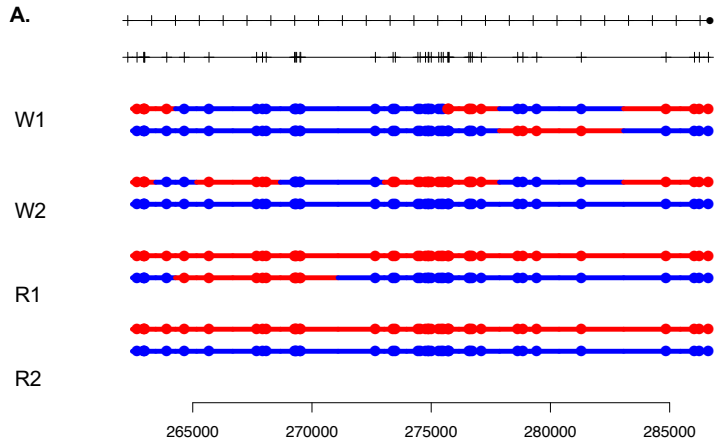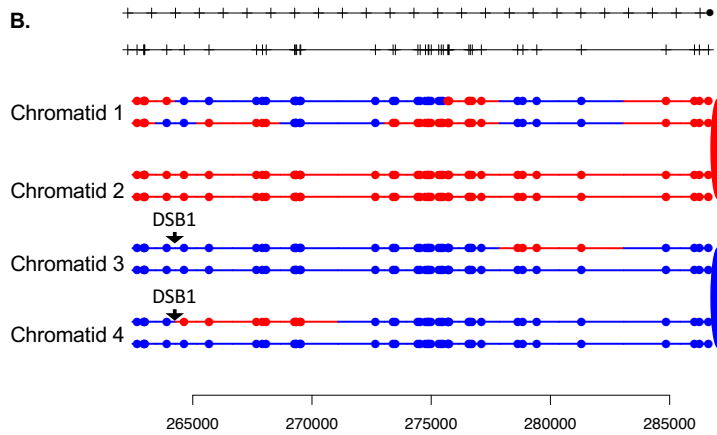

|     |      |                                                                                                                                                                    |                                                                                                                                    |
|-----|------|--------------------------------------------------------------------------------------------------------------------------------------------------------------------|------------------------------------------------------------------------------------------------------------------------------------|
| S66 | NCO1 | Heteroduplex on chromatid 3 separated from putative DSB site by long region of homoduplex                                                                          | Extension of broken end by interaction with sister chromatid, followed by SDSA                                                     |
|     | NCO2 | Heteroduplexes on both chromatids 1 and 4; chromatid 1 has trans heteroduplexes flanking the DSB site in addition to regions of homoduplex within the heteroduplex | Invasion of right end, followed by cleavage of junction and invasion of left end; branch migration; Mlh1-independent patchy repair |

**C.**

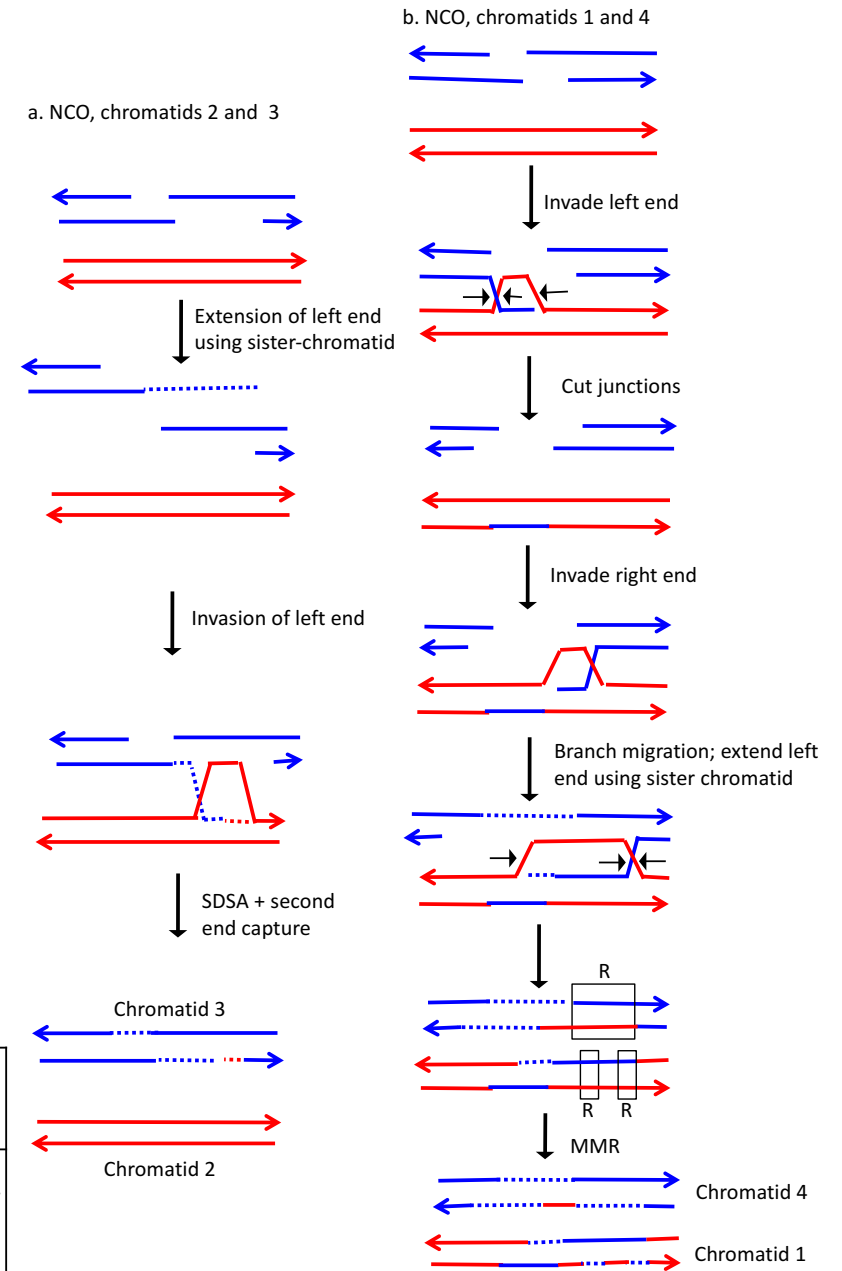

S67

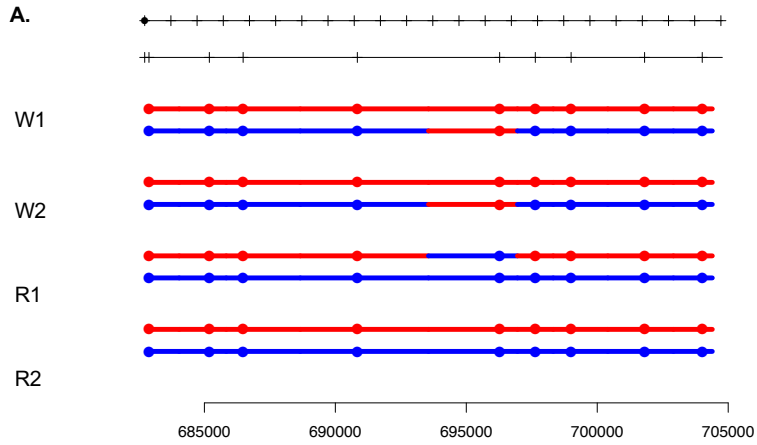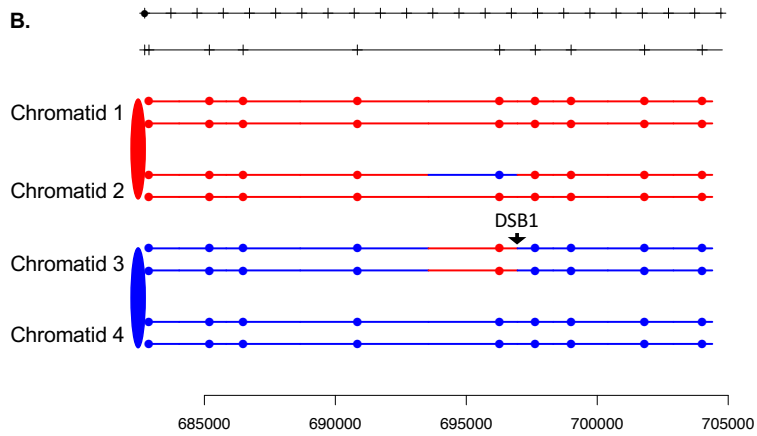

**C.**

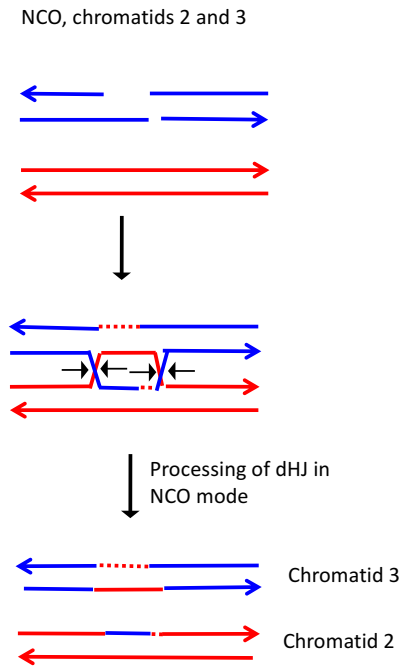

|     |     |                                                                                        |                                                   |
|-----|-----|----------------------------------------------------------------------------------------|---------------------------------------------------|
| S67 | NCO | Uni-directional heteroduplexes on chromatids 2 and 3 propagated in opposite directions | NCO mode of dHJ resolution with limited synthesis |
|-----|-----|----------------------------------------------------------------------------------------|---------------------------------------------------|

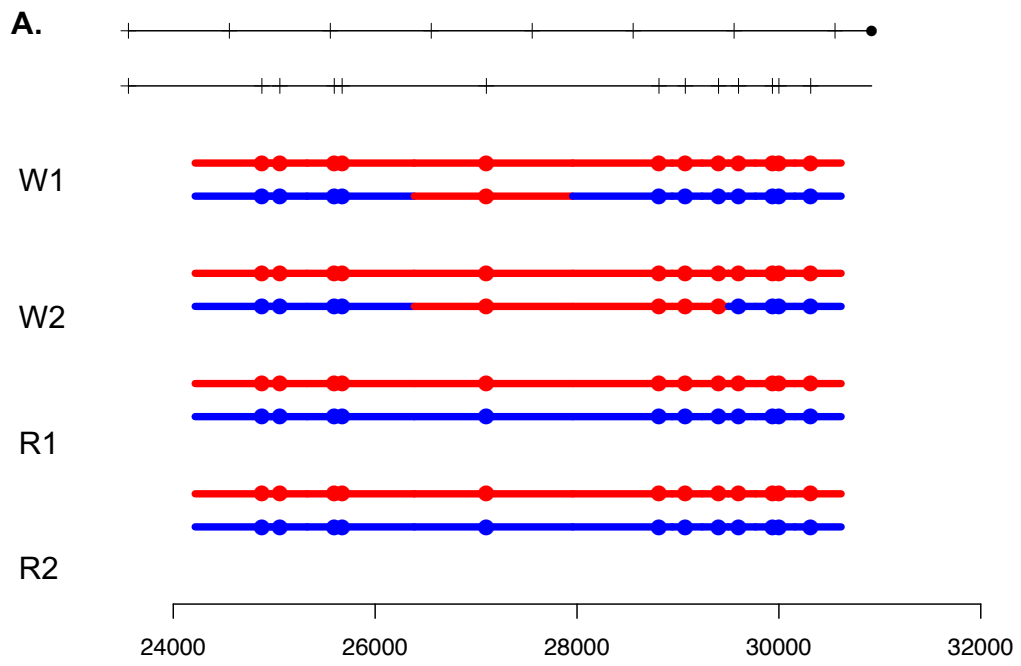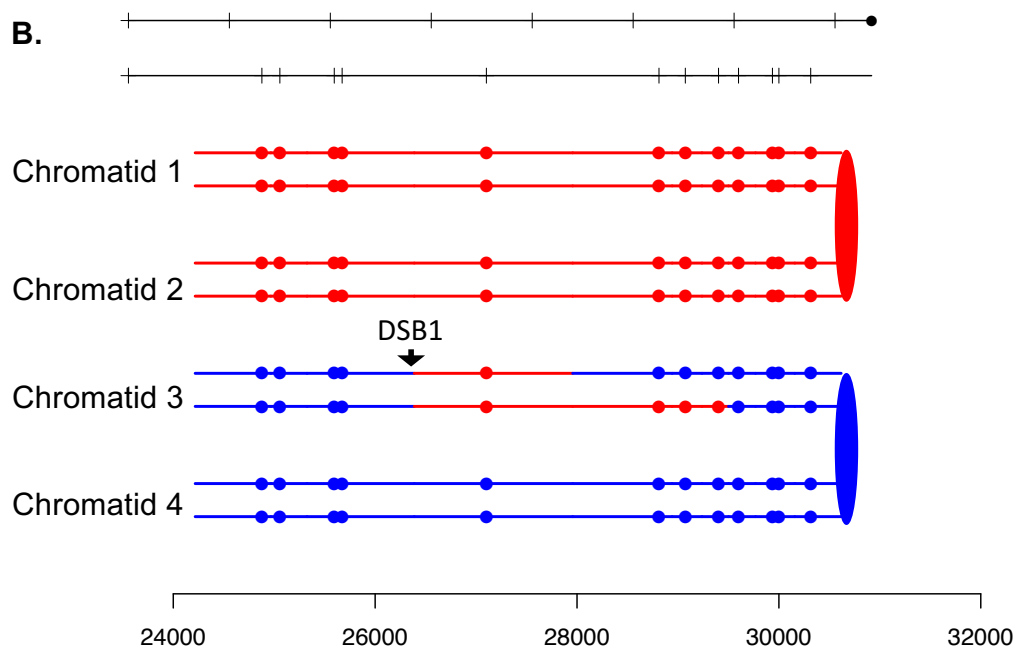

A.

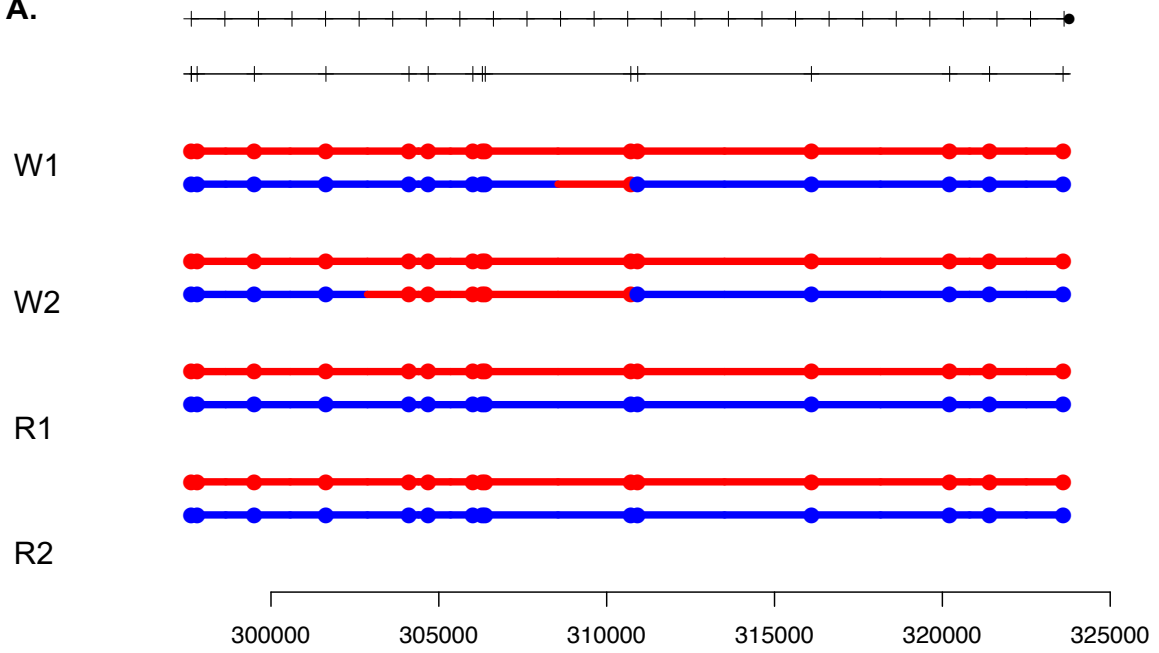

B.

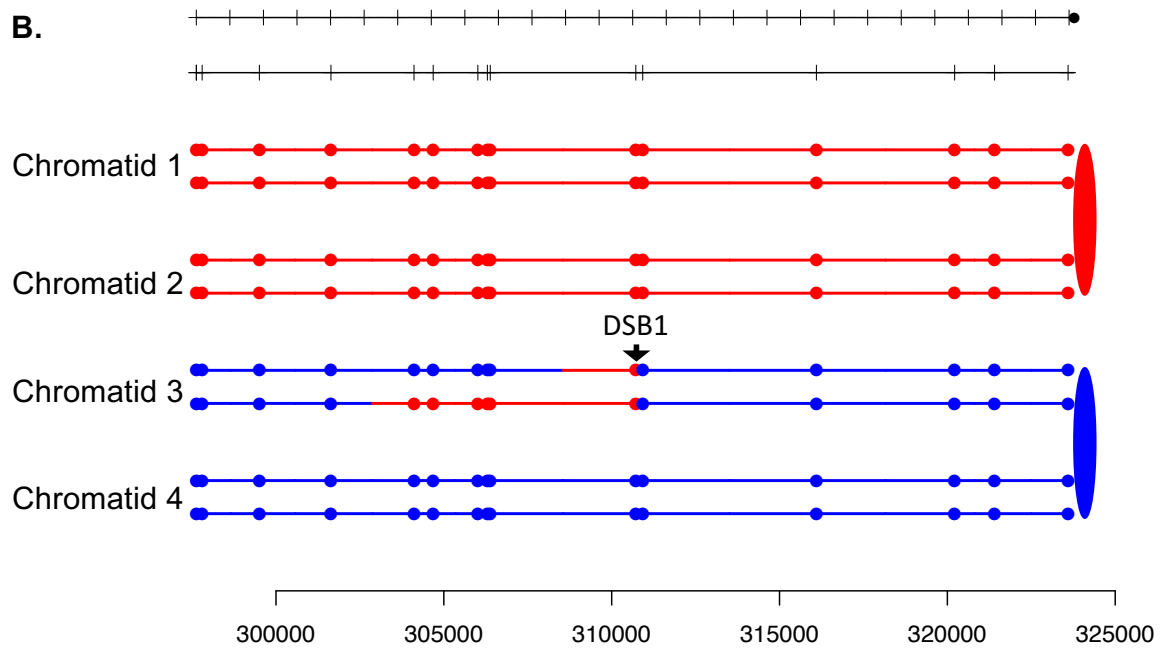

S70

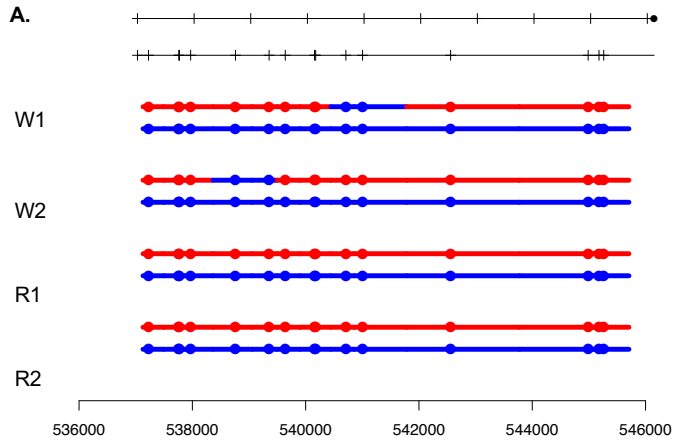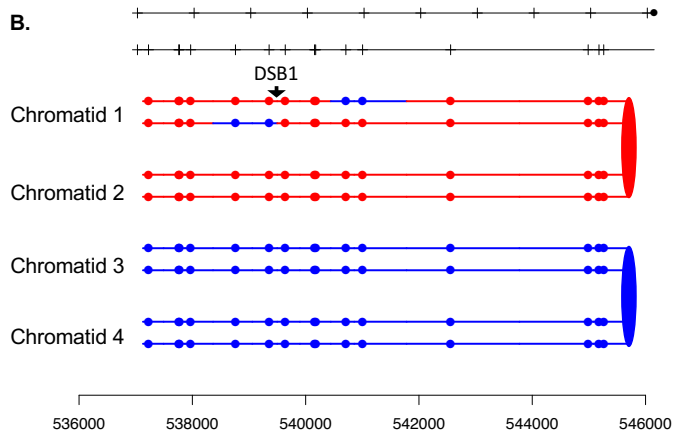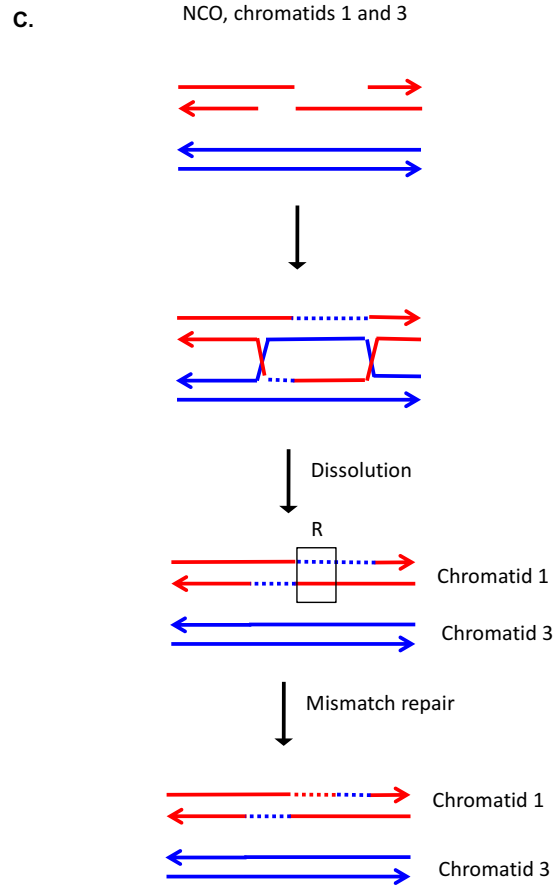

|     |     |                                                                           |                                                                         |
|-----|-----|---------------------------------------------------------------------------|-------------------------------------------------------------------------|
| S70 | NCO | <i>Trans</i> heteroduplexes separated by restoration tract on chromatid 1 | Formation of dHJ event; dissolution followed by Mlh1-independent repair |
|-----|-----|---------------------------------------------------------------------------|-------------------------------------------------------------------------|

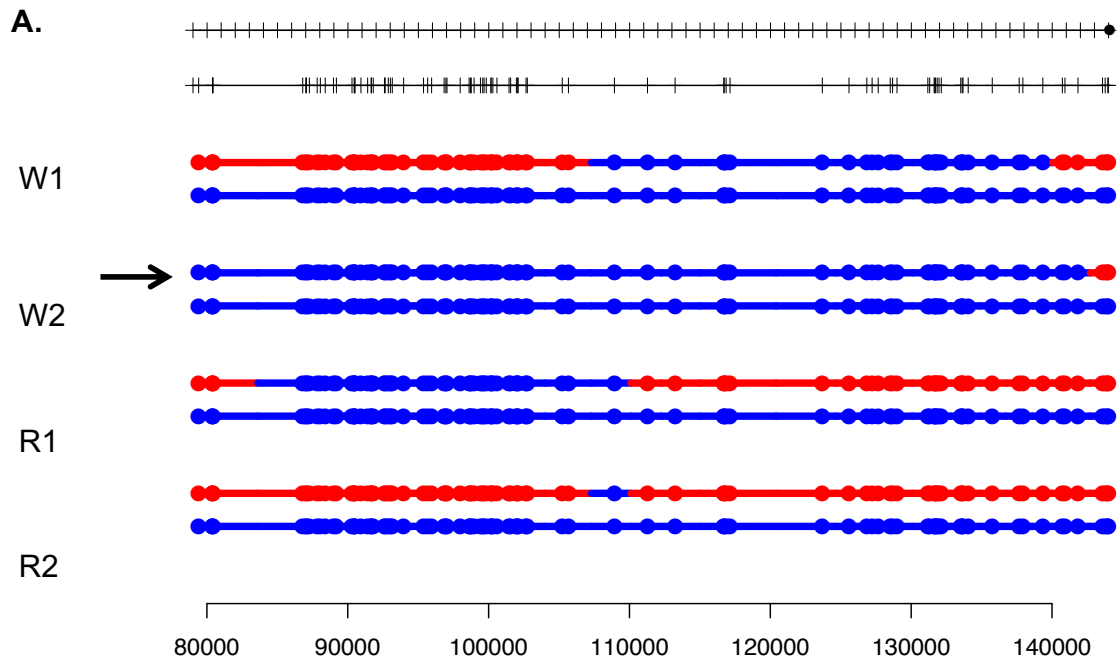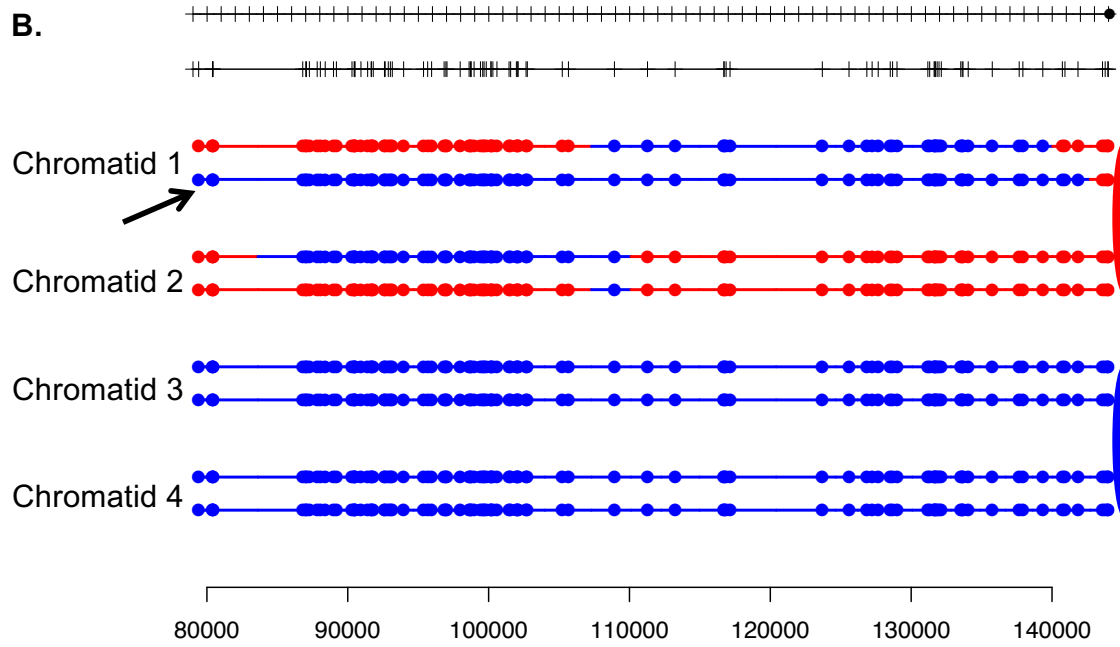

S72

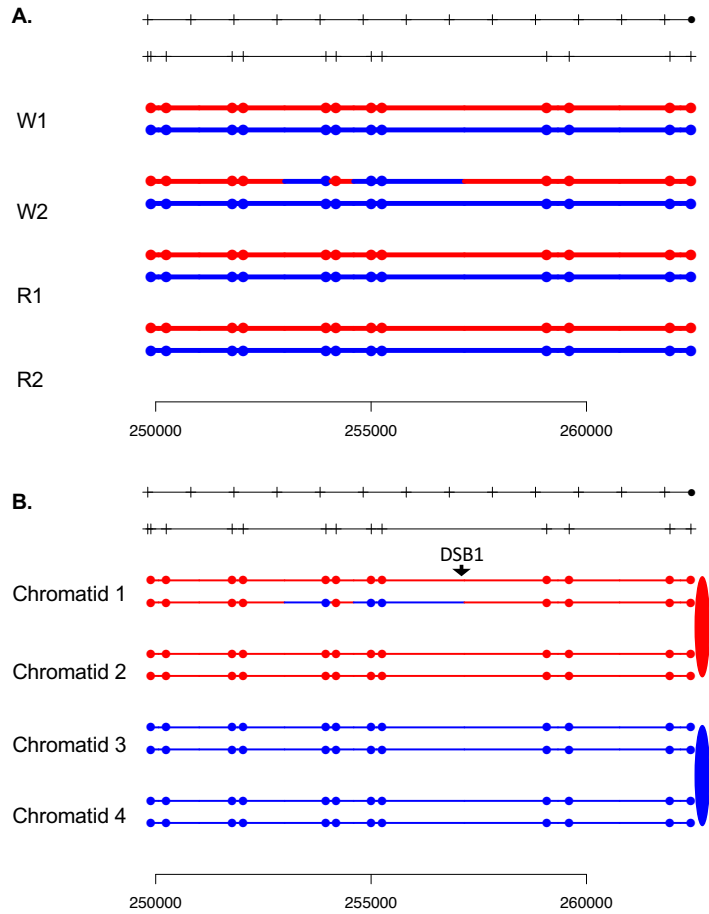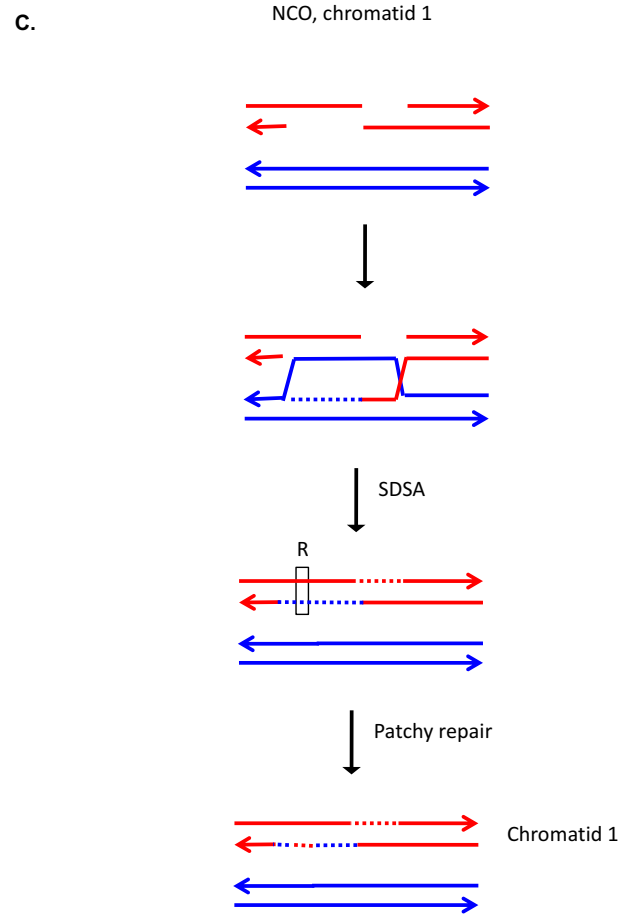

|     |     |                                                       |                            |
|-----|-----|-------------------------------------------------------|----------------------------|
| S72 | NCO | Heteroduplex tract with an internal restoration tract | Mlh1-independent MMR, SDSA |
|-----|-----|-------------------------------------------------------|----------------------------|



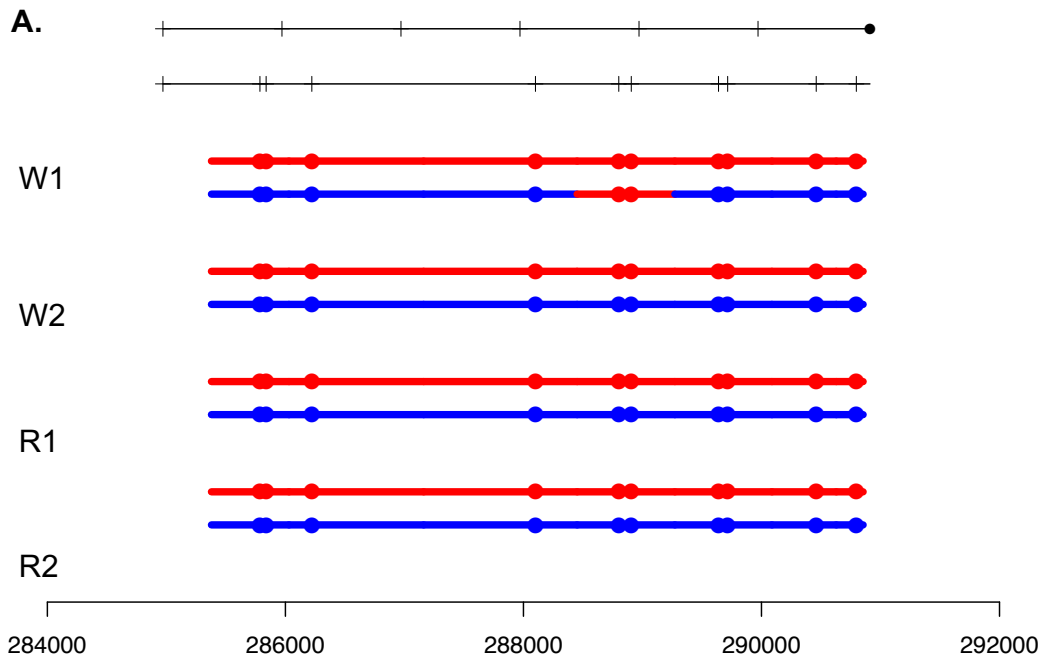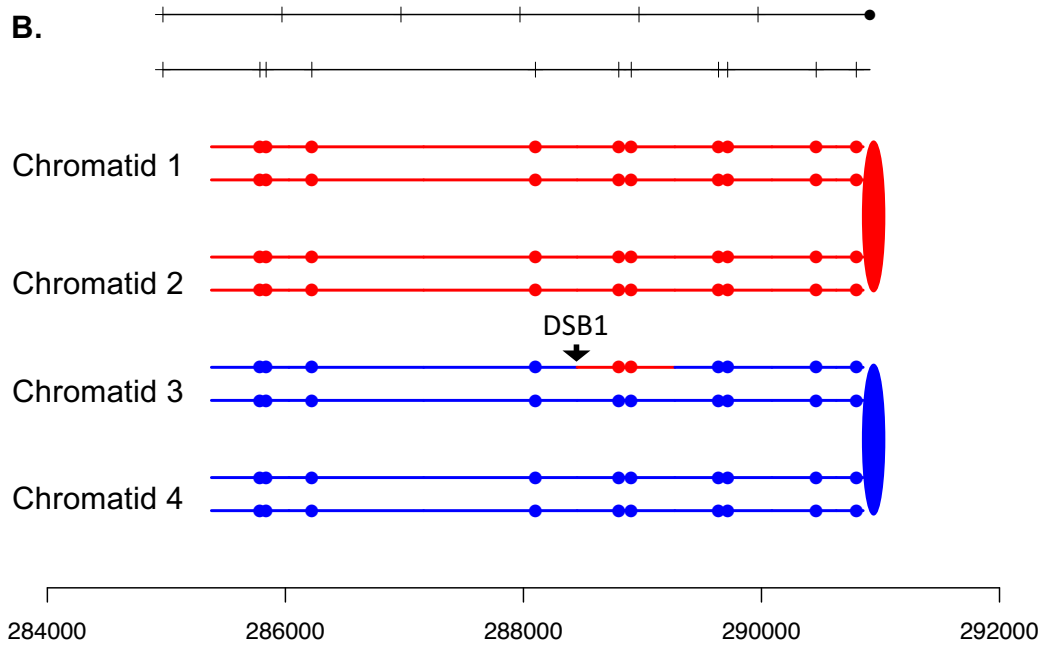

S74

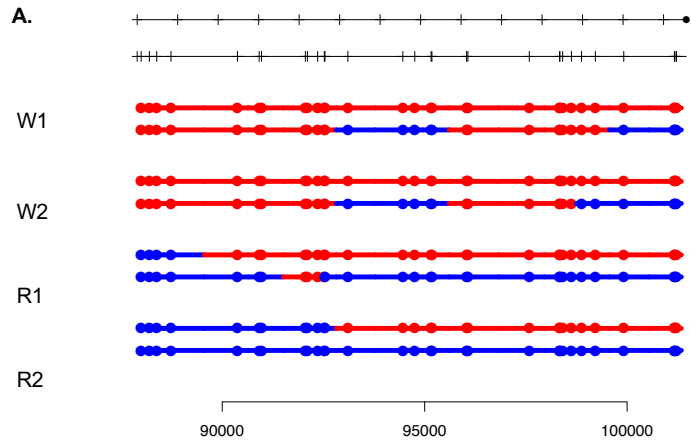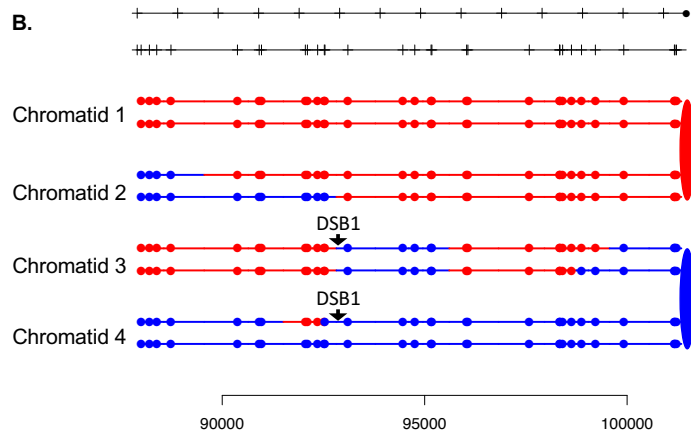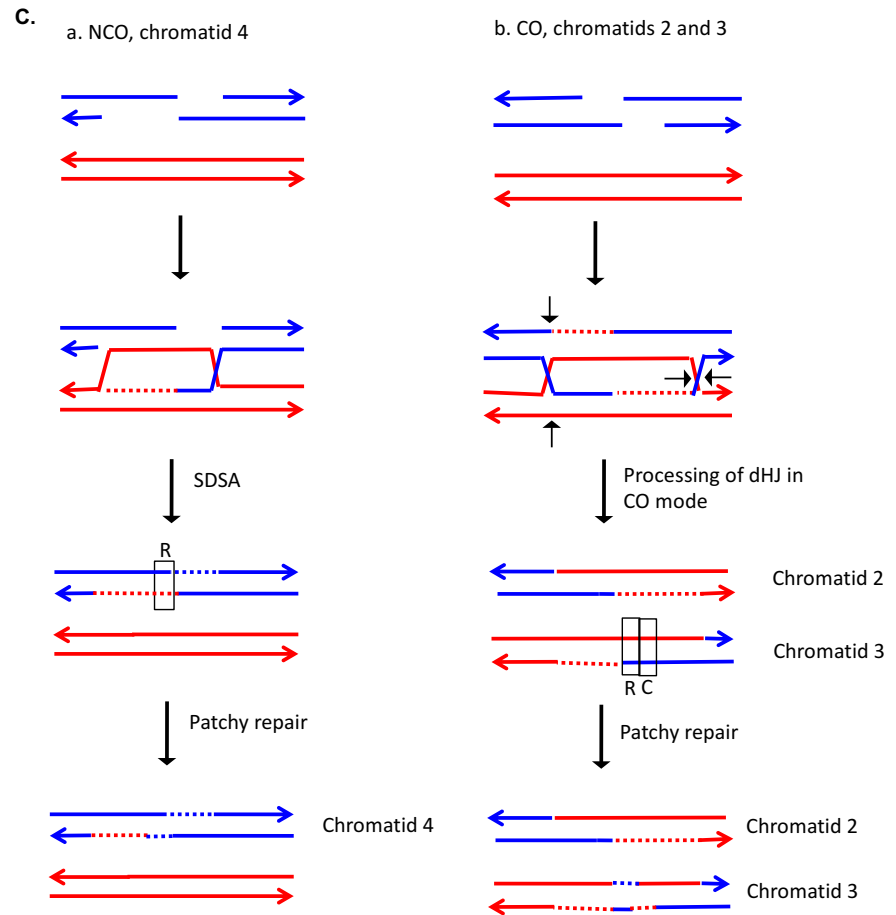

|     |     |                                                                                               |                                            |
|-----|-----|-----------------------------------------------------------------------------------------------|--------------------------------------------|
| S74 | NCO | Region of restoration repair separating DSB site from heteroduplex on chromatid 4             | Mlh1-independent MMR, SDSA                 |
|     | CO  | Long regions of restoration and conversion repair separating DSB site from heteroduplex tract | Mlh1-independent MMR or template switching |

**A.**

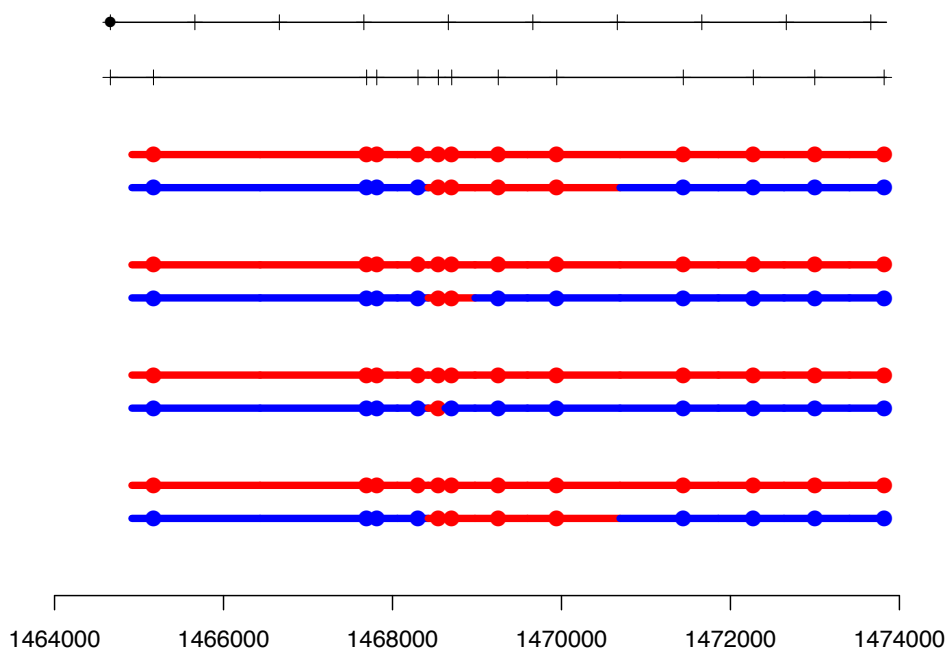

**B.**

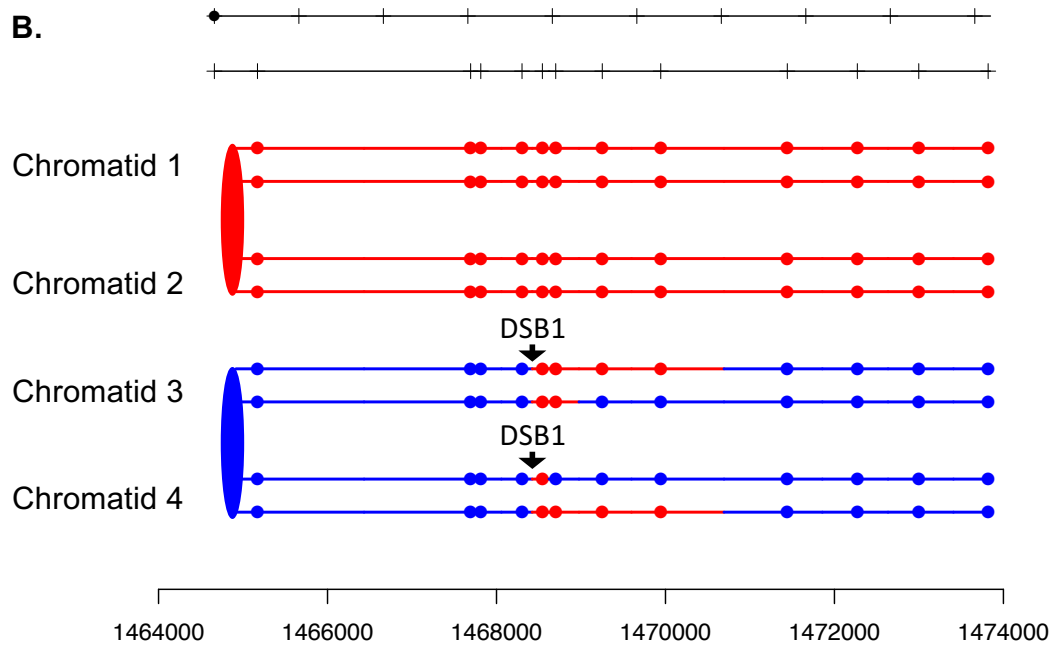

S76

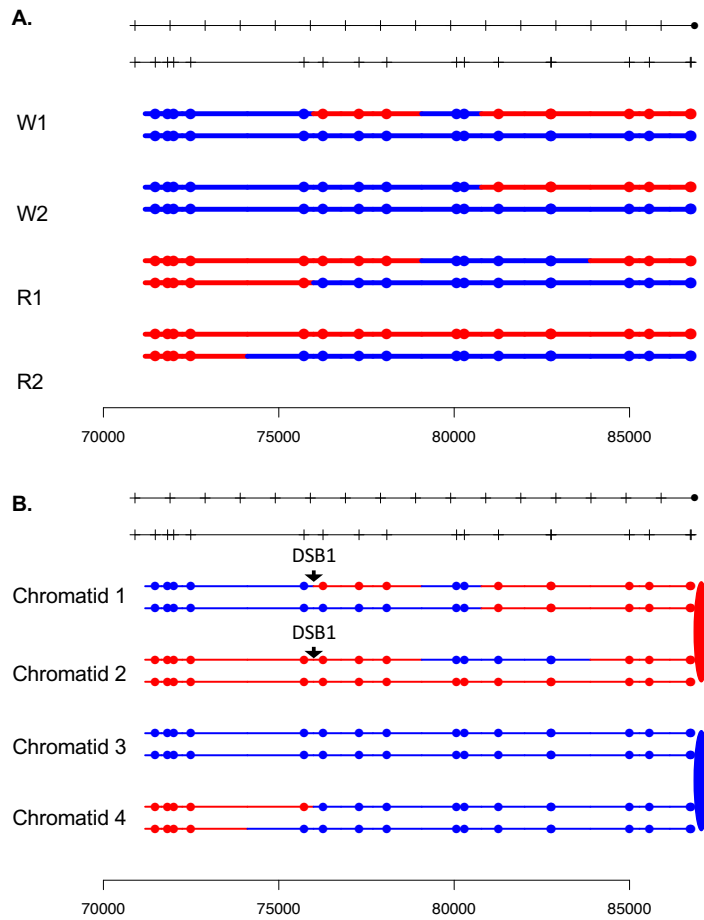

**C.**

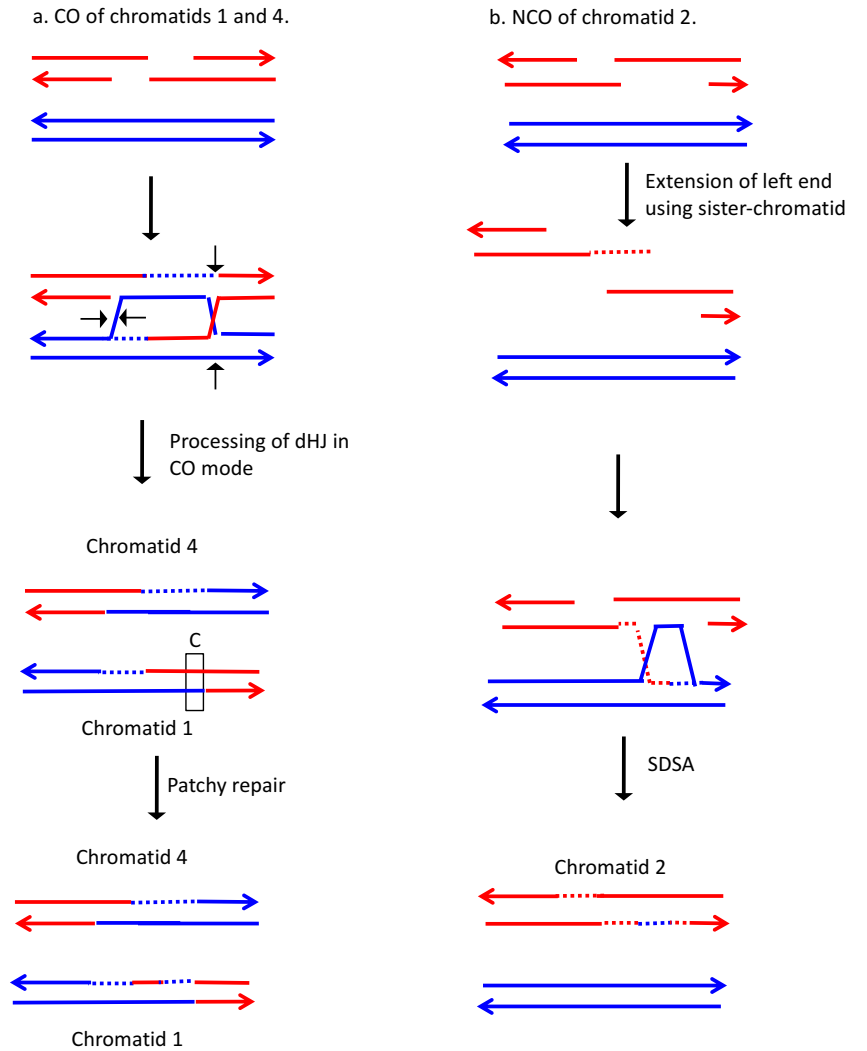

|     |     |                                                   |                                                                                                   |
|-----|-----|---------------------------------------------------|---------------------------------------------------------------------------------------------------|
| S76 | CO  | Conversion event at the end of heteroduplex tract | Mlh1-independent MMR, resolution of dHJ in CO mode                                                |
|     | NCO | Displacement of heteroduplex tract from DSB site  | Interaction of broken end with sister chromatid or long restoration tract by Mlh1-independent MMR |

S77

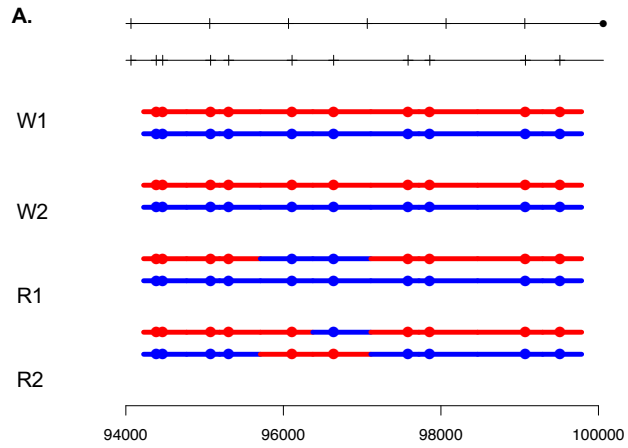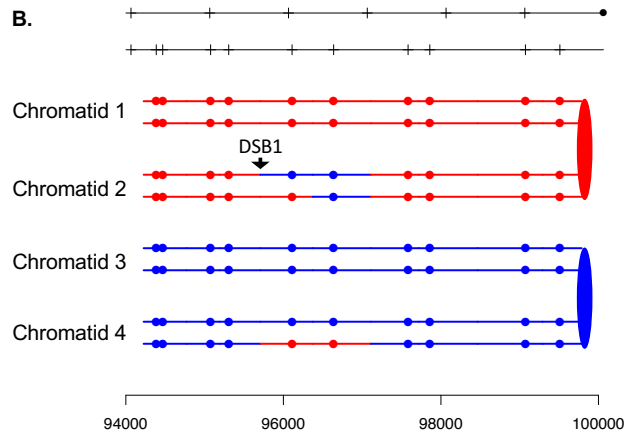

**C.**

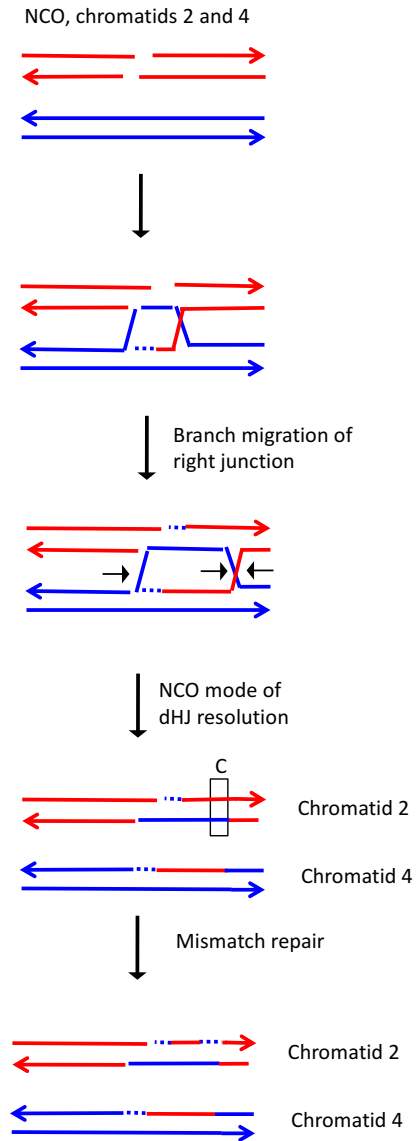

|     |     |                                                                       |                                                               |
|-----|-----|-----------------------------------------------------------------------|---------------------------------------------------------------|
| S77 | NCO | Symmetric heteroduplex; conversion tract at end of heteroduplex tract | Branch migration; Mlh1-independent MMR; NCO processing of dHJ |
|-----|-----|-----------------------------------------------------------------------|---------------------------------------------------------------|

S78

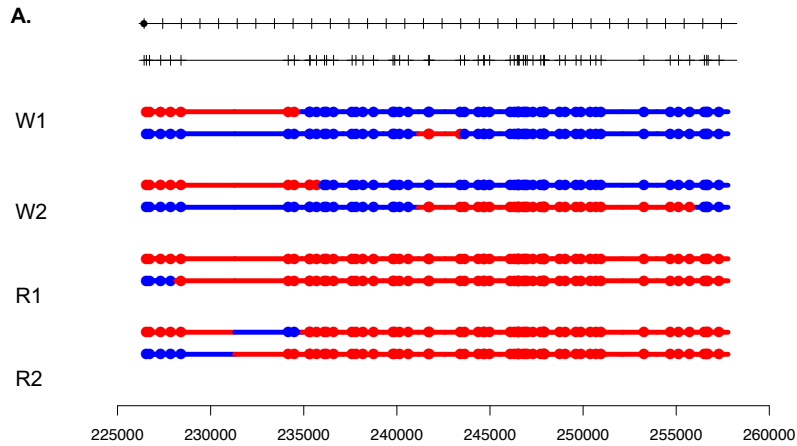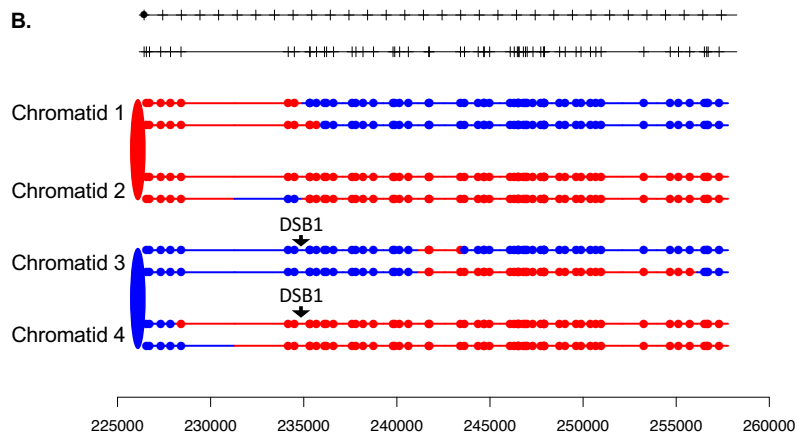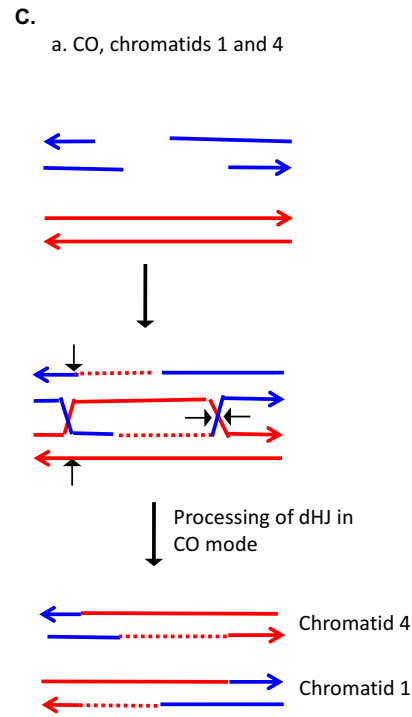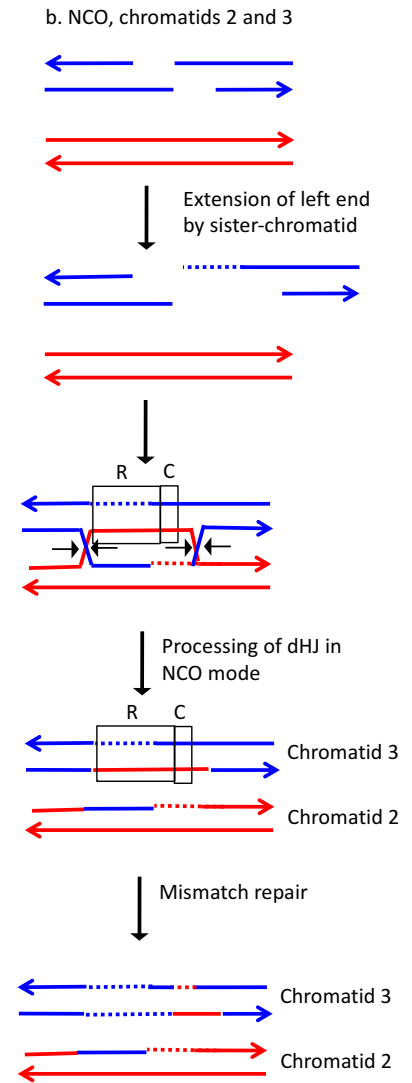

|     |     |                                                                                  |                                                                           |
|-----|-----|----------------------------------------------------------------------------------|---------------------------------------------------------------------------|
| S78 | NCO | Regions of homoduplex separating heteroduplex region from DSB site               | Mlh1-independent MMR or template switching; resolution of dHJ in NCO mode |
|     | CO  | Region of conversion separating heteroduplex region from DSB site on chromatid 4 | Mlh1-independent MMR or gap repair; resolution of dHJ in CO mode          |

S79

A.

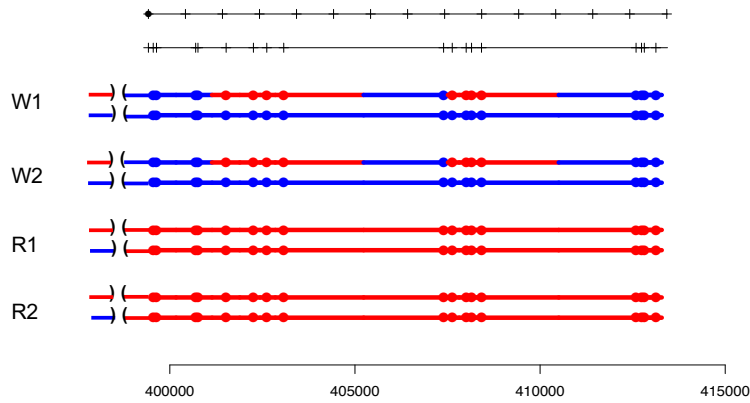

B.

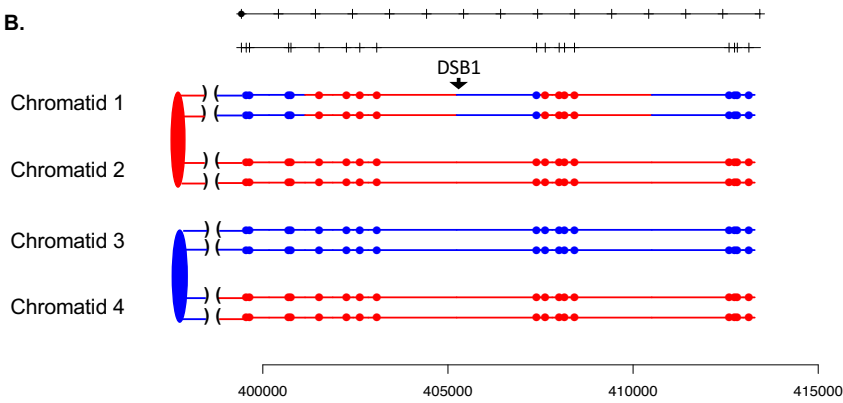

C.

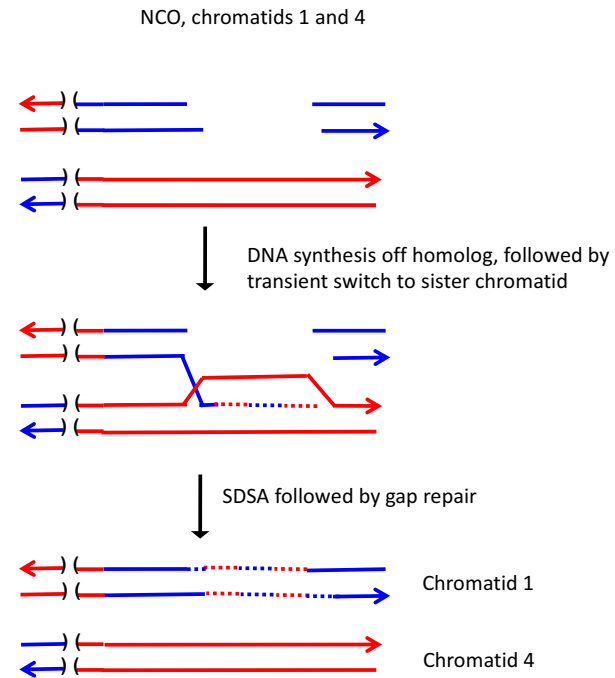

|     |     |                                                                                                                                                                                                                           |                                                                                                                                                                                                                     |
|-----|-----|---------------------------------------------------------------------------------------------------------------------------------------------------------------------------------------------------------------------------|---------------------------------------------------------------------------------------------------------------------------------------------------------------------------------------------------------------------|
| S79 | NCO | In regions centromere-proximal to event, both homologs in white sector derived from one parental homolog and both in red sector derived from the other; regions of conversion and restoration homoduplexes on chromatid 1 | Crossover on same chromosomes located centromere-proximal to the event in S79 (described in S78) produced centromere-proximal regions. Homoduplex regions produced by template switching or by Mlh1-independent MMR |
|-----|-----|---------------------------------------------------------------------------------------------------------------------------------------------------------------------------------------------------------------------------|---------------------------------------------------------------------------------------------------------------------------------------------------------------------------------------------------------------------|

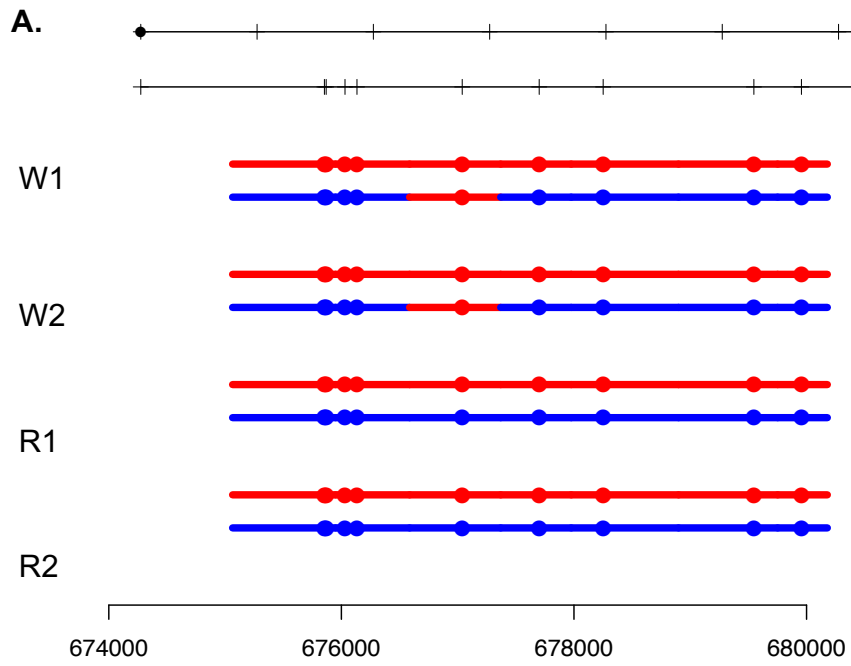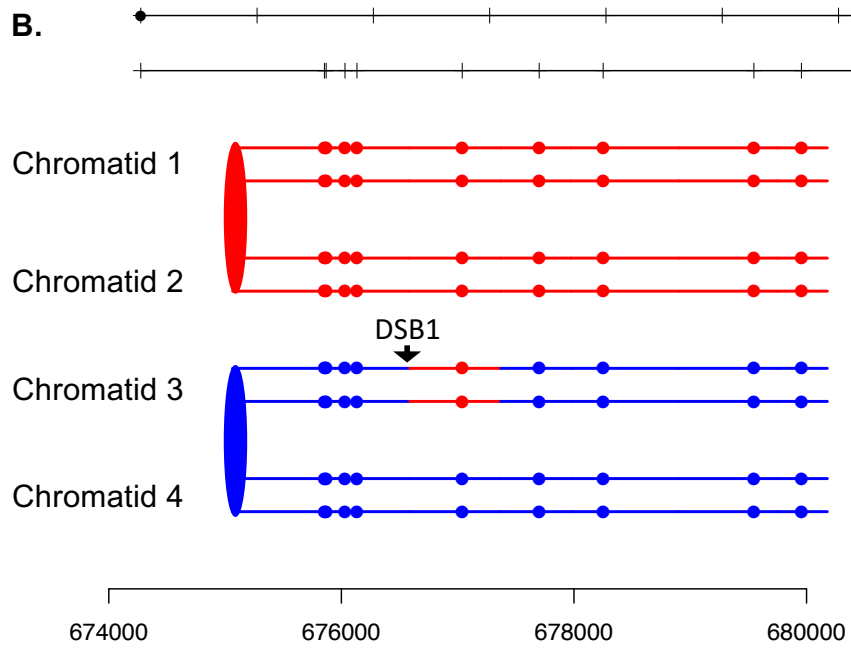



S81

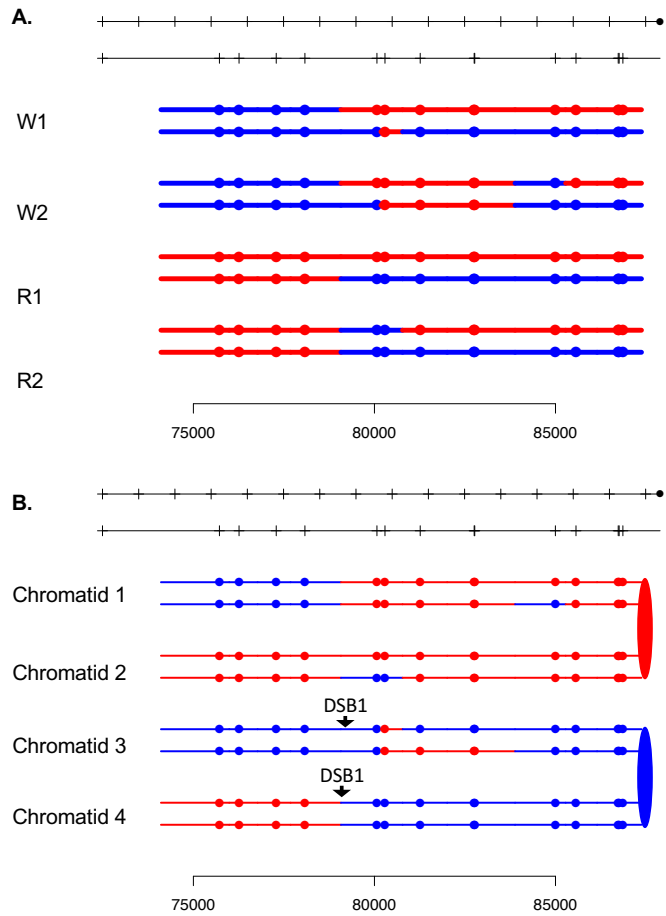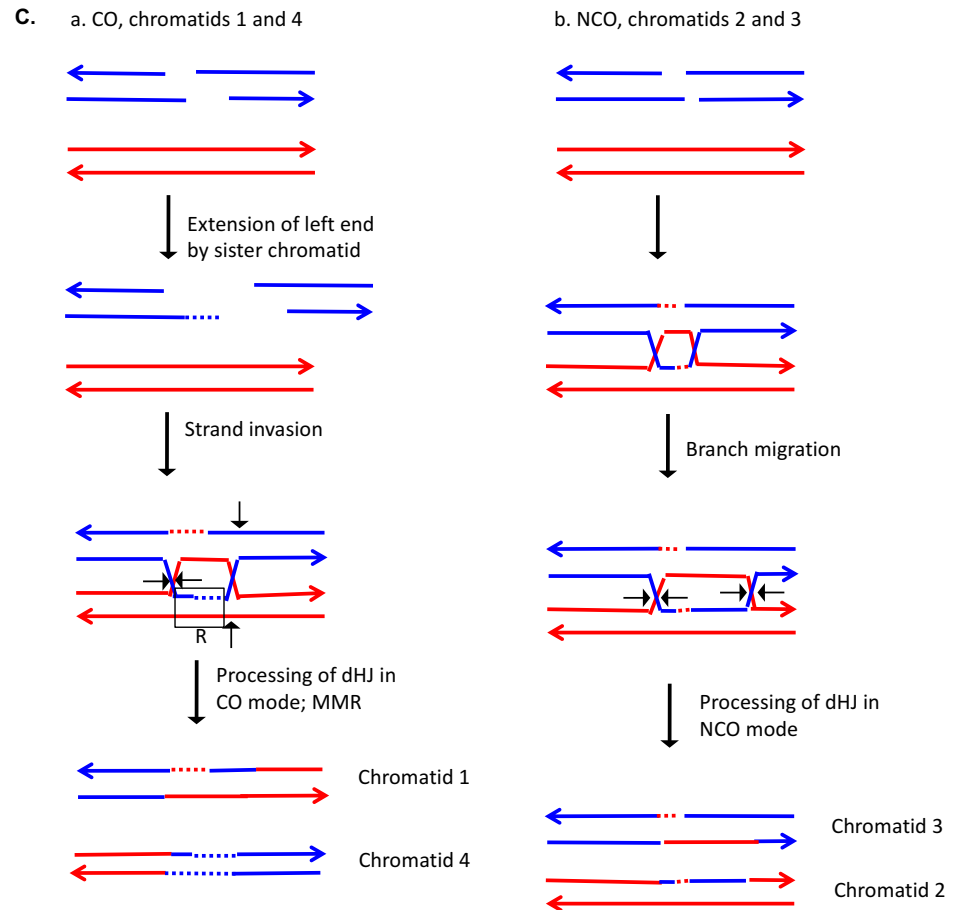

|     |     |                                                             |                                                                                                                                 |
|-----|-----|-------------------------------------------------------------|---------------------------------------------------------------------------------------------------------------------------------|
| S81 | CO  | Long tracts of homoduplex on chromatids 1 and 4.            | Extension of broken end by interaction with sister chromatid; Mlh1-independent restoration repair; resolution of dHJ in CO mode |
|     | NCO | Heteroduplex DNA on same side of DSB site in NCO chromatids | Branch migration followed by processing of dHJ in CO mode                                                                       |

S82

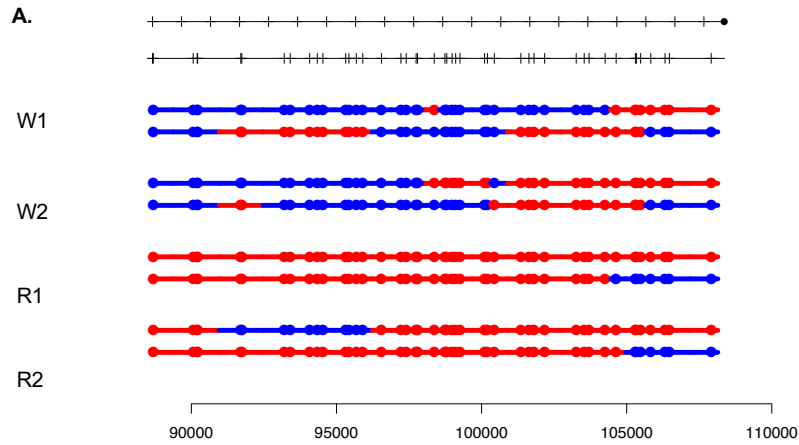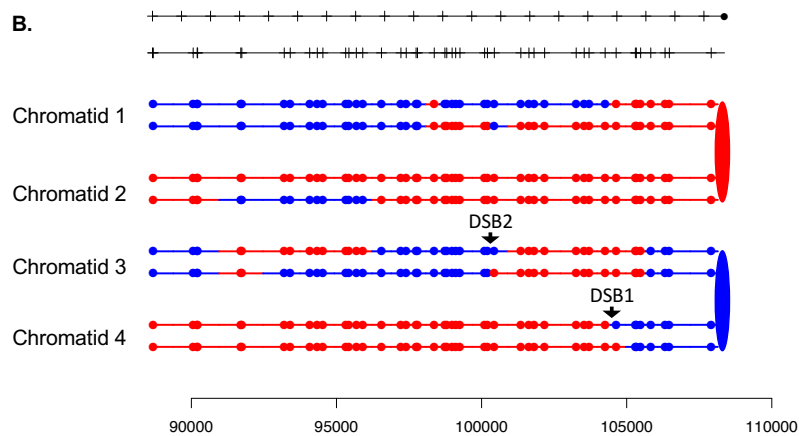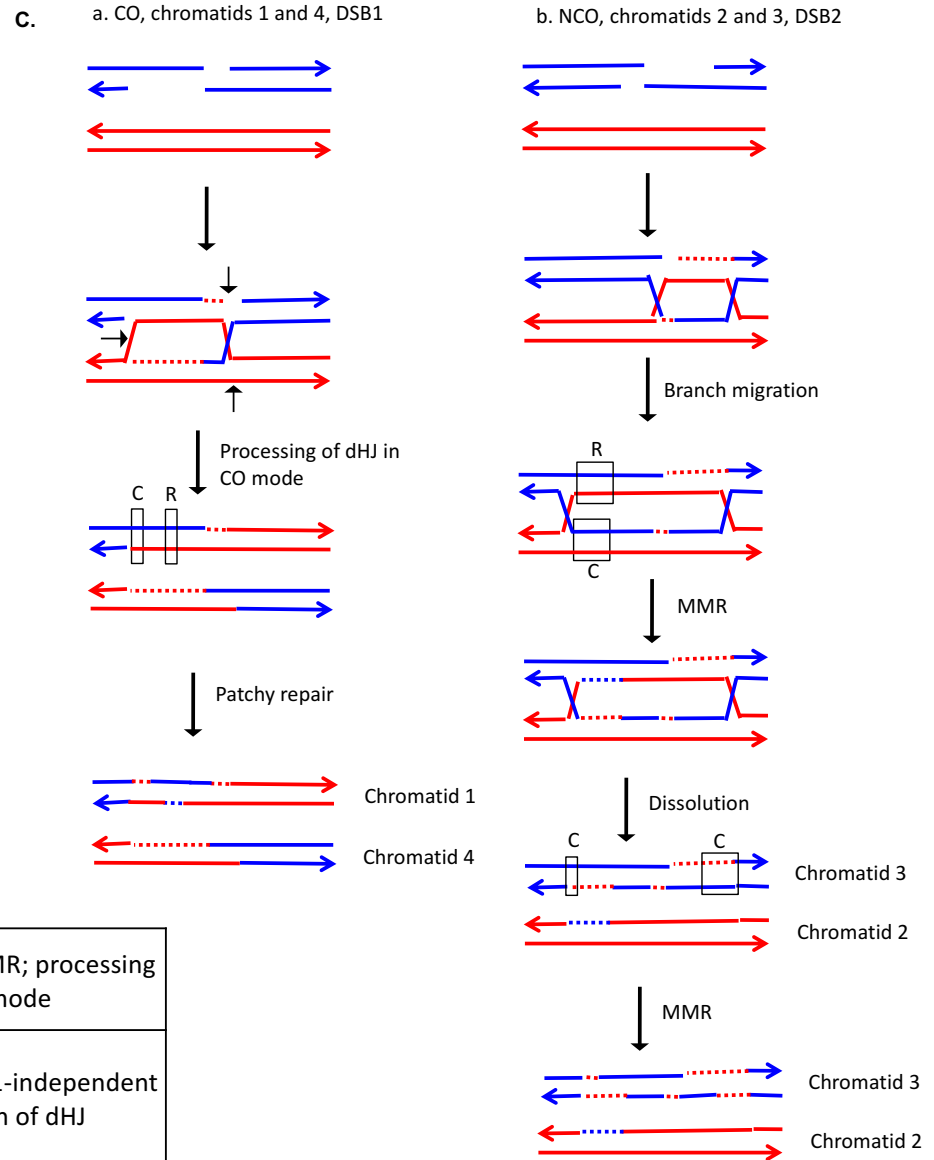

|     |     |                                                                                                                                         |                                                            |
|-----|-----|-----------------------------------------------------------------------------------------------------------------------------------------|------------------------------------------------------------|
| S82 | CO  | Heteroduplex with interspersed conversion and restoration tracts (chromatid 1); initiated at DSB1                                       | Mlh1-independent MMR; processing of dHJ in CO mode         |
|     | NCO | Symmetric heteroduplex tracts; heteroduplex tract interspersed with homoduplex regions; strand switch on chromatid 3; initiated at DSB2 | Branch migration; Mlh1-independent MMR; dissolution of dHJ |

S83

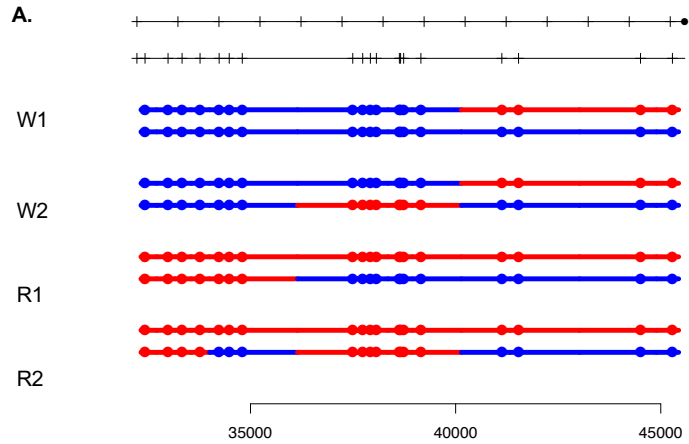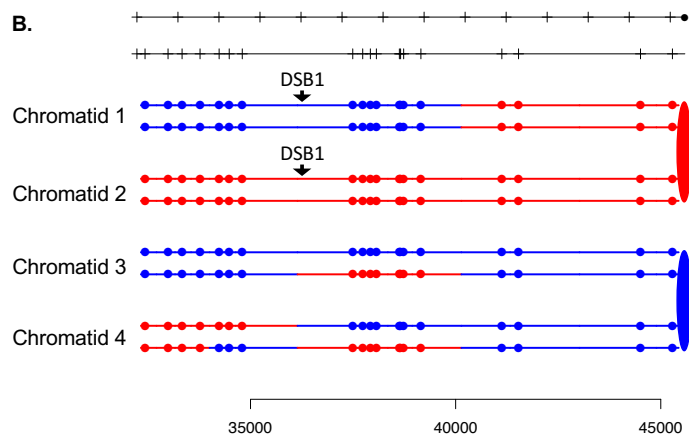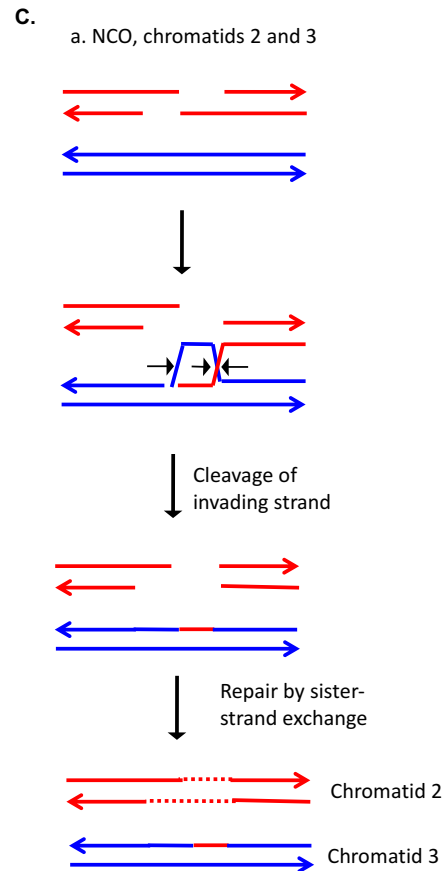

b. CO, chromatids 1 and 4

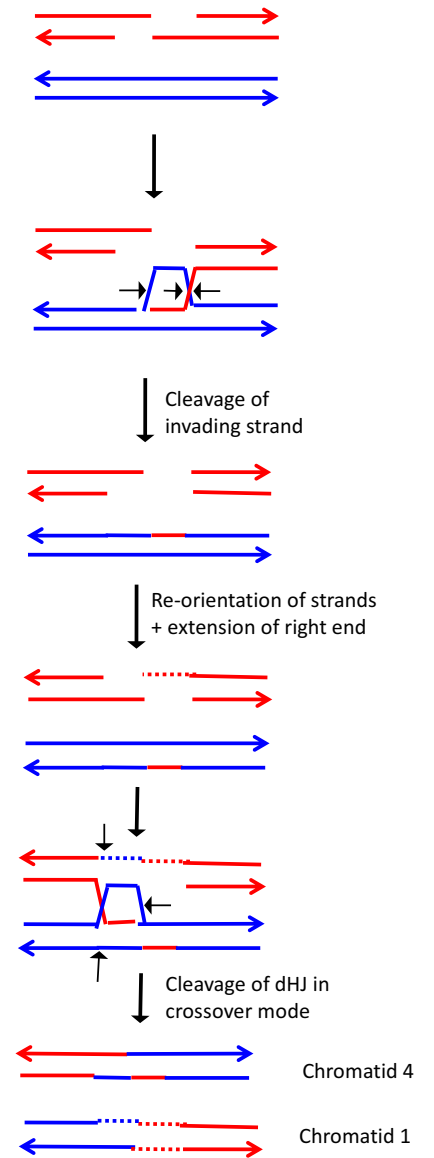

|     |     |                                                       |                                                                                                                                                                                             |
|-----|-----|-------------------------------------------------------|---------------------------------------------------------------------------------------------------------------------------------------------------------------------------------------------|
| S83 | CO  | Strand switch of heteroduplex in CO chromatid 4       | Invasion of the right broken end, followed by processing of junction; extension of right end by sister-chromatid interaction; invasion of the left end and processing dHJ in crossover mode |
|     | NCO | DSB on red chromatid, but red chromatid acts as donor | Following strand invasion, junction cleaved before initiating DNA synthesis                                                                                                                 |

S84

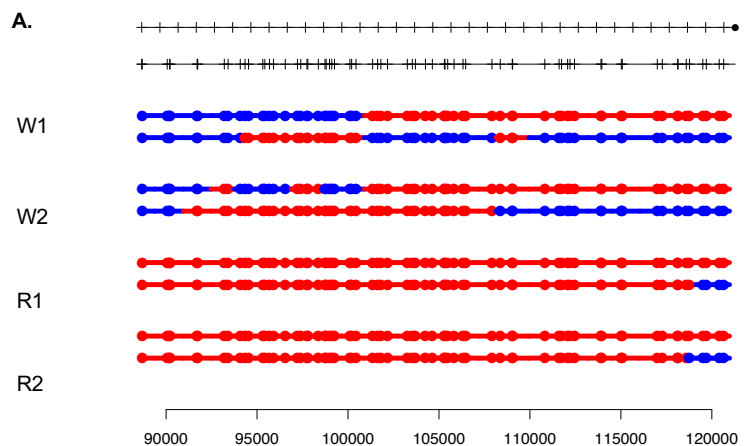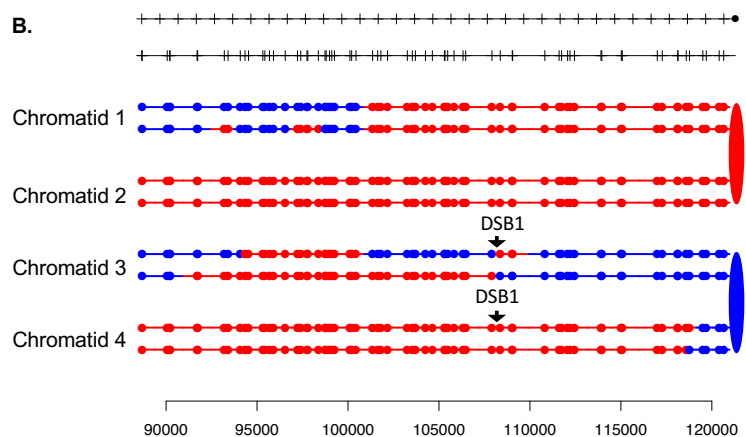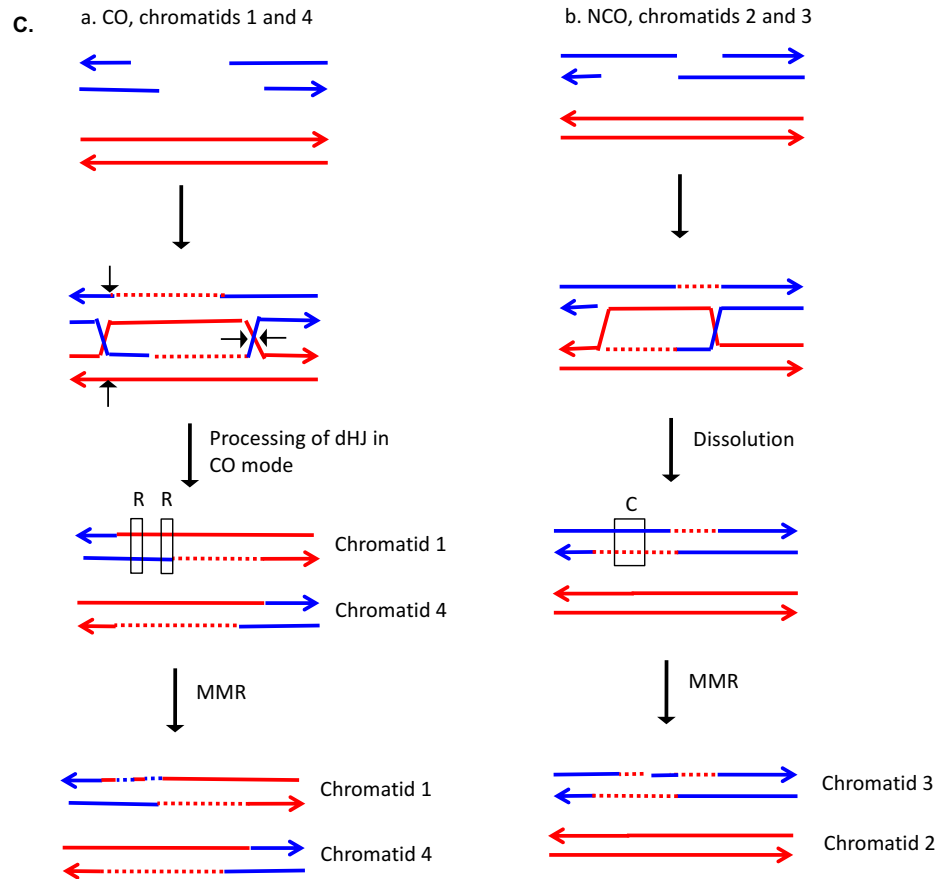

|     |     |                                                                                                                                  |                                                                |
|-----|-----|----------------------------------------------------------------------------------------------------------------------------------|----------------------------------------------------------------|
| S84 | CO  | Long conversion tract spanning DSBs in both CO chromatids 1 and 4; heteroduplex in chromatid 1 interrupted by restoration tracts | Gap repair; Mlh1-independent MMR; resolution of dHJ in CO mode |
|     | NCO | NCO chromatid 3 has strand switch of heteroduplexes; conversion event within heteroduplex                                        | Resolution of dHJ by dissolution; Mlh1-independent MMR         |

S85

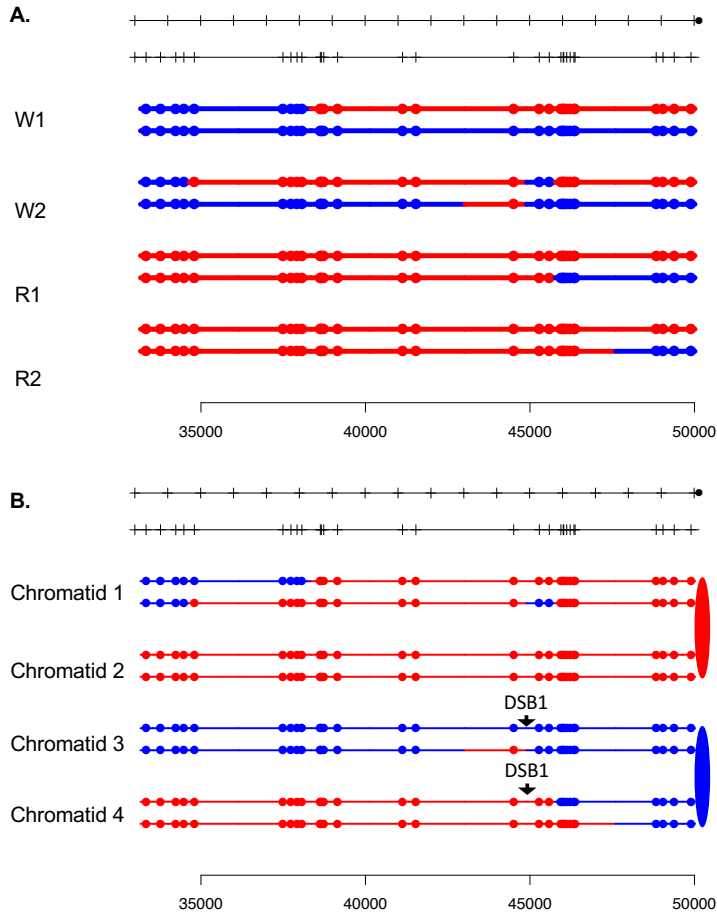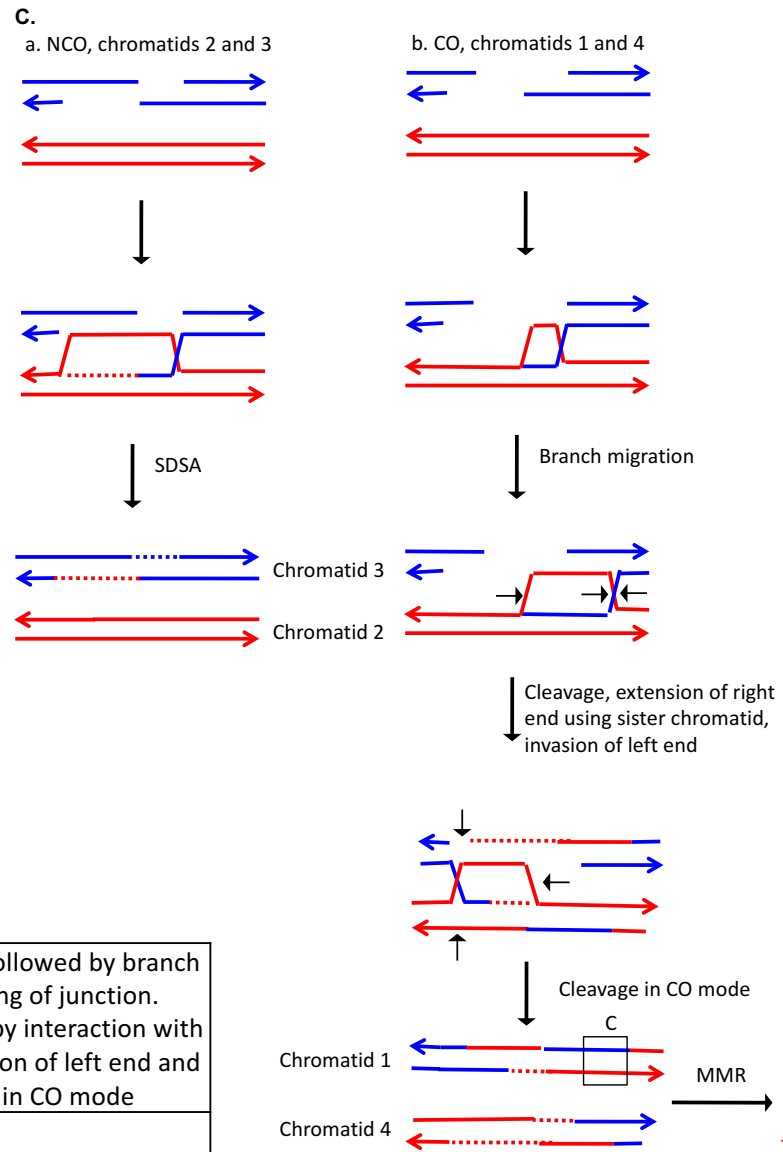

|     |     |                                                                                                                                                      |                                                                                                                                                                                                 |
|-----|-----|------------------------------------------------------------------------------------------------------------------------------------------------------|-------------------------------------------------------------------------------------------------------------------------------------------------------------------------------------------------|
| S85 | CO  | Strand switch in CO chromatid 1; heteroduplexes in trans on chromatids 1 and 4; long conversion tract adjacent to heteroduplex region in chromatid 1 | Invasion of right end, followed by branch migration and cutting of junction. Extension of right end by interaction with sister chromatid; invasion of left end and resolution of dHJ in CO mode |
|     | NCO | Simple heteroduplex                                                                                                                                  | SDSA                                                                                                                                                                                            |

S86

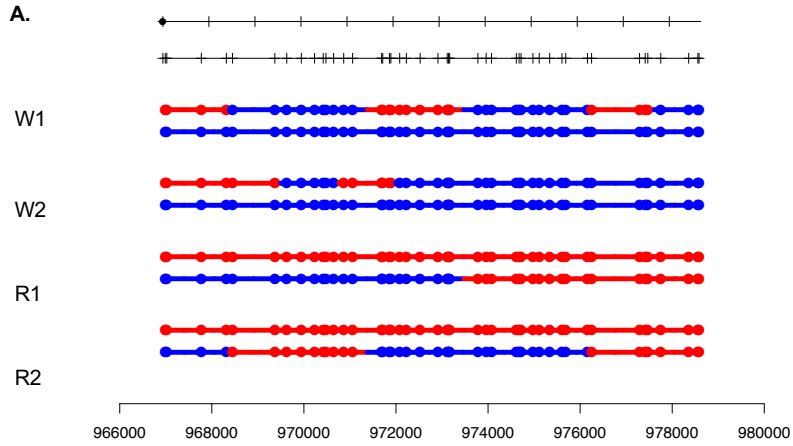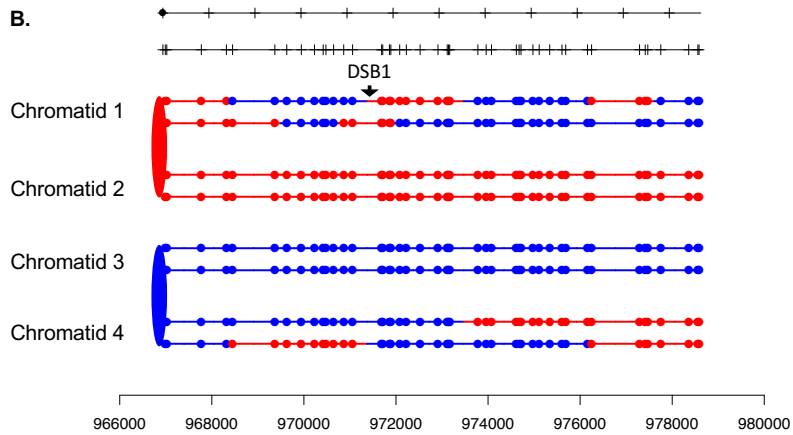

**C.**

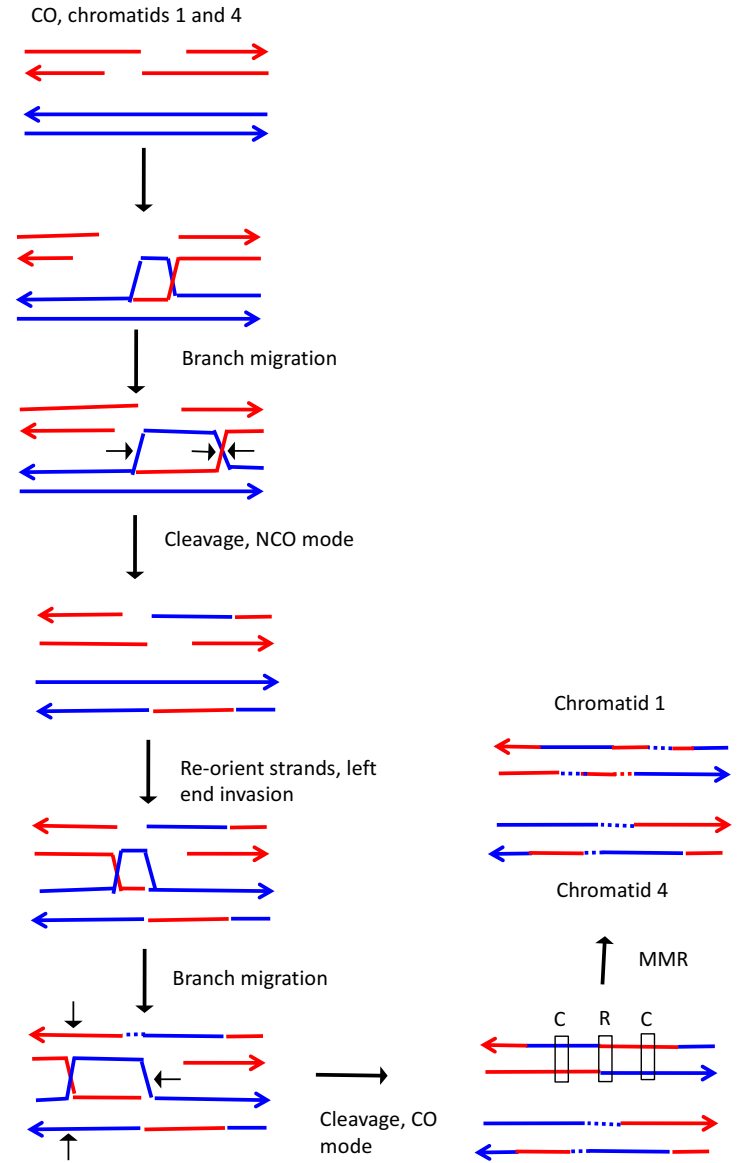

|     |    |                                                                                                                                         |                                                                                                                                                                                                   |
|-----|----|-----------------------------------------------------------------------------------------------------------------------------------------|---------------------------------------------------------------------------------------------------------------------------------------------------------------------------------------------------|
| S86 | CO | Strand switches in heteroduplexes in both CO chromatids 1 and 4; both chromatids have homoduplex regions interspersed with heteroduplex | Invasion of right broken end, followed by branch migration; resolution of junctions in NCO mode, followed by left end invasion and branch migration; cleavage in CO mode and Mlh1-independent MMR |
|-----|----|-----------------------------------------------------------------------------------------------------------------------------------------|---------------------------------------------------------------------------------------------------------------------------------------------------------------------------------------------------|

S87

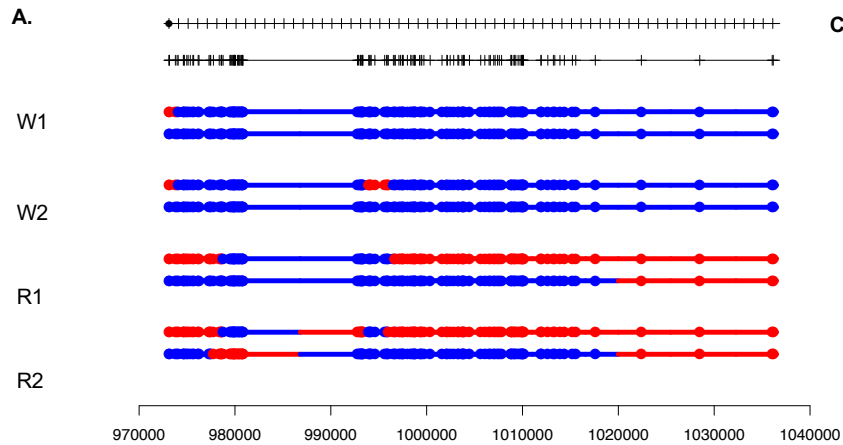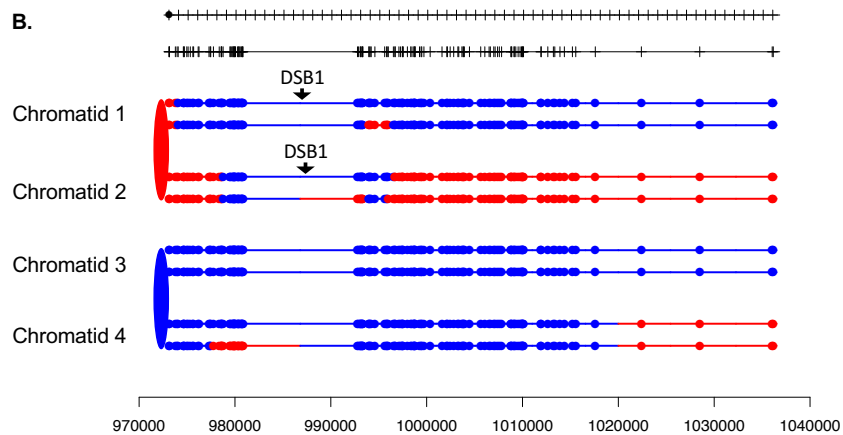

**C.**

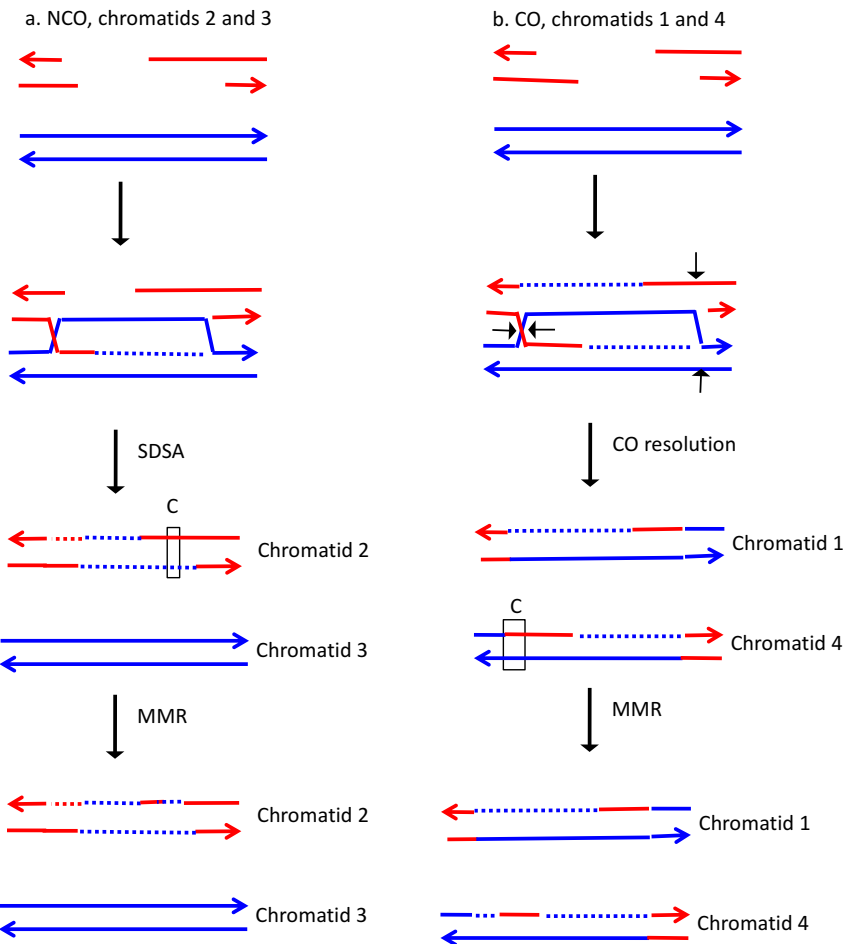

|     |     |                                                                                                                                                                                                              |                                                                                                  |
|-----|-----|--------------------------------------------------------------------------------------------------------------------------------------------------------------------------------------------------------------|--------------------------------------------------------------------------------------------------|
| S87 | CO  | Large region of conversion spanning putative DSB site; uni-directional heteroduplexes on chromatids 1 and 4 propagated in opposite directions;; conversion tract distal to heteroduplex tract on chromatid 4 | Repair of large gap associated with HS4 hotspot; processing dHJ in CO mode; Mlh1-independent MMR |
|     | NCO | Region of conversion spanning putative DSB site; conversion tract adjacent to heteroduplex                                                                                                                   | Repair of large gap; SDSA; Mlh1-independent MMR                                                  |

S88

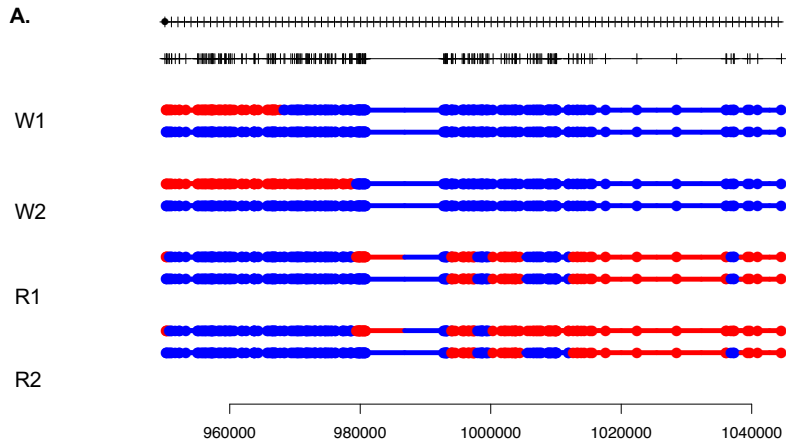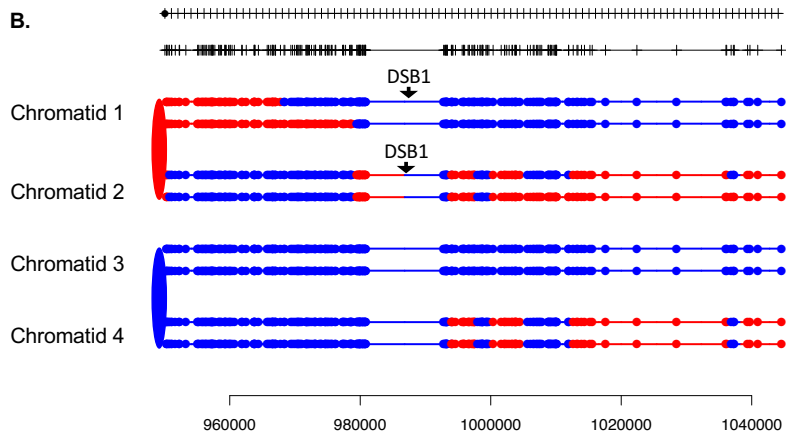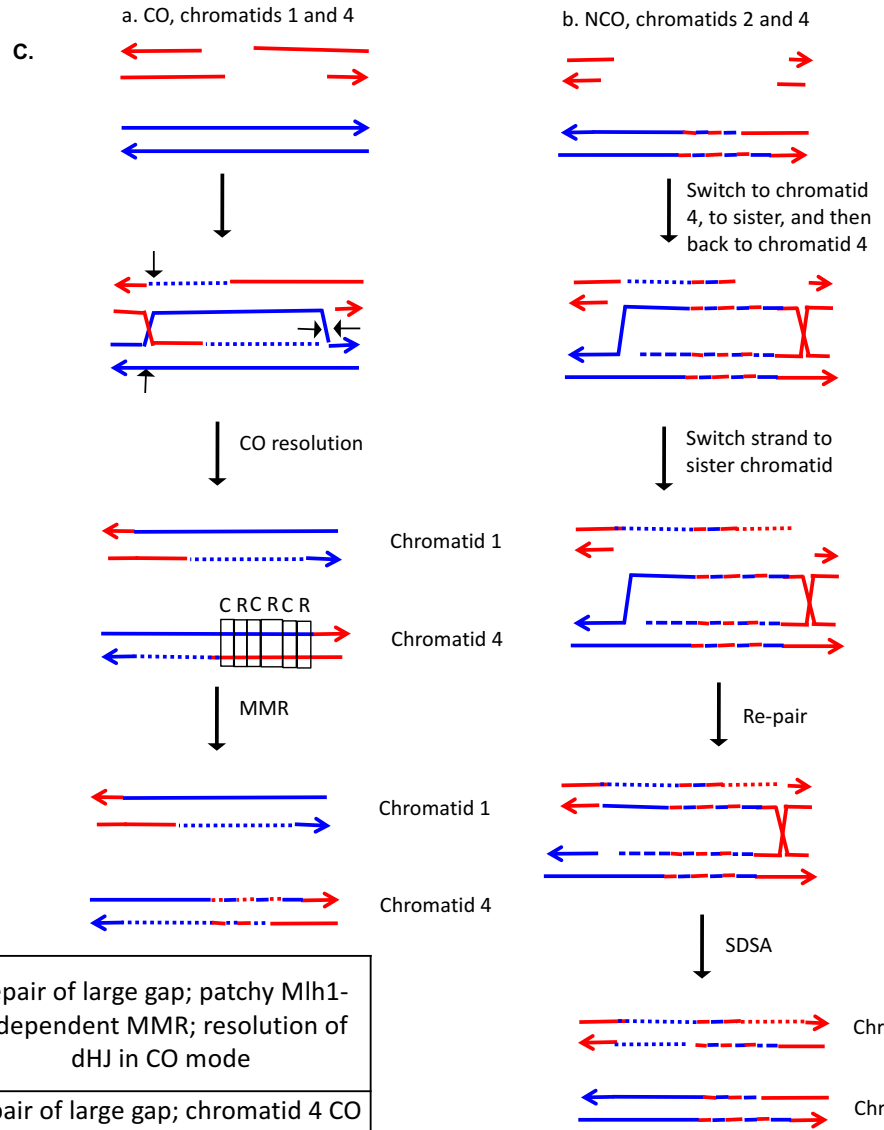

|     |     |                                                                                                                                                                                                                       |                                                                                                                                         |
|-----|-----|-----------------------------------------------------------------------------------------------------------------------------------------------------------------------------------------------------------------------|-----------------------------------------------------------------------------------------------------------------------------------------|
| S88 | CO  | Region of conversion spanning putative DSB site; uni-directional heteroduplex tracts in on chromatids 1 and 4 propagated in different directions; multiple homoduplex tracts within heteroduplex tract on chromatid 4 | Repair of large gap; patchy Mlh1-independent MMR; resolution of dHJ in CO mode                                                          |
|     | NCO | Large conversion tract spanning putative DSB site; chromatid 3 has a pattern of heteroduplex and homoduplex tracts that is very similar to that of chromatid 4                                                        | Repair of large gap; chromatid 4 CO chromatid used as template for part of repair; also, switch of repair templates to sister chromatid |



S89

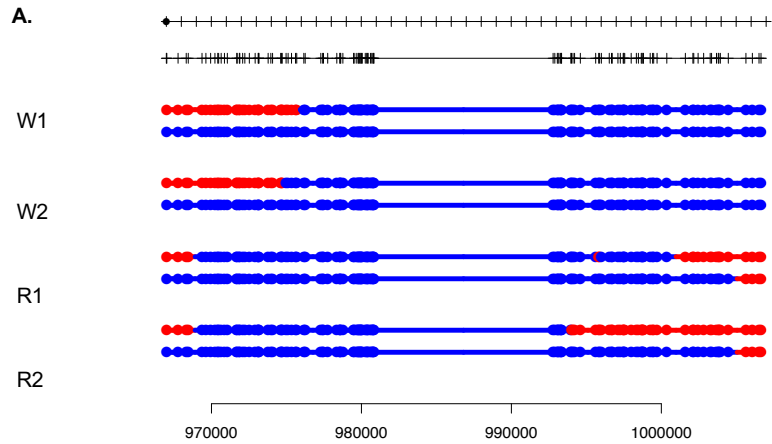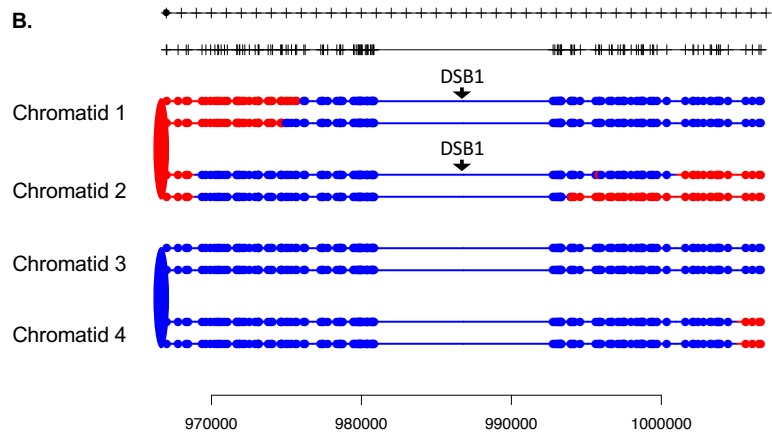

**C.**

a. CO, chromatids 1 and 4

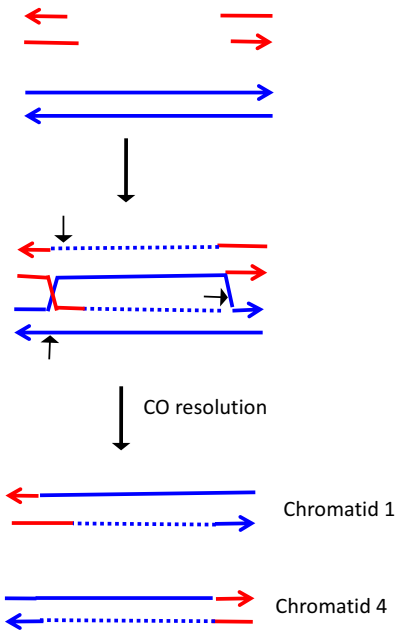

b. NCO, chromatids 2 and 3

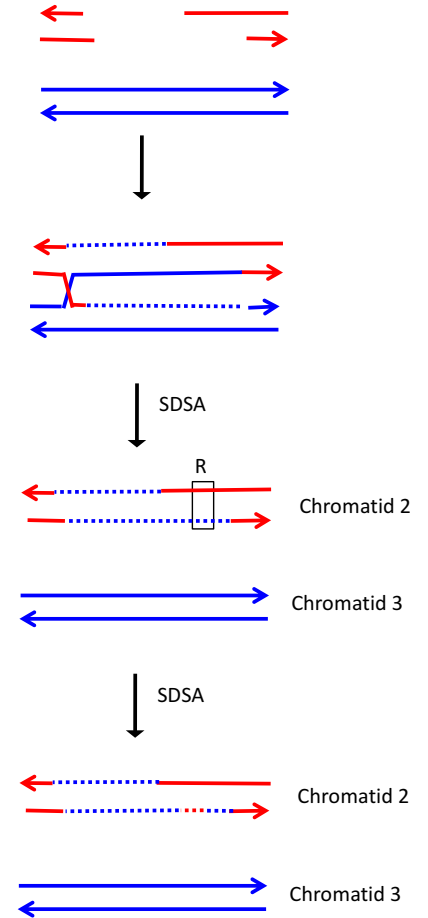

|     |     |                                                                                                     |                                                                          |
|-----|-----|-----------------------------------------------------------------------------------------------------|--------------------------------------------------------------------------|
| S89 | CO  | Very large conversion tract spanning putative DSB site; heteroduplex on chromatid 1 but not 4       | Repair of large gap; resolution of dHJ in CO mode                        |
|     | NCO | Very large conversion tract spanning putative DSB site; restoration tract in middle of heteroduplex | Repair of large gap; resolution of dHJ in NCO mode; Mlh1-independent MMR |

S90

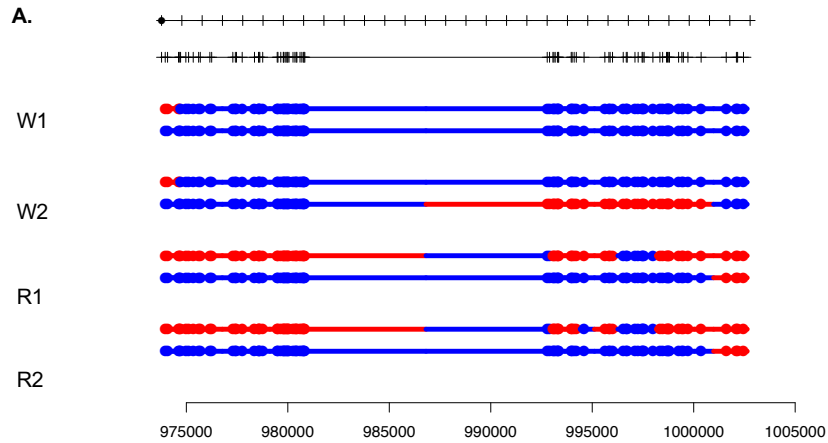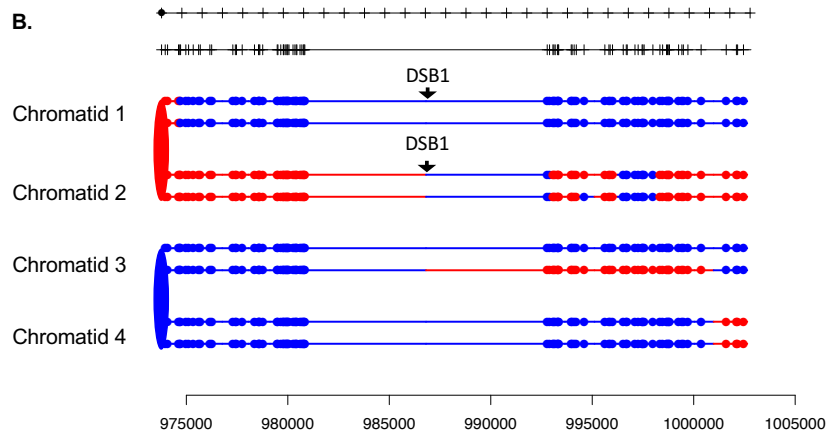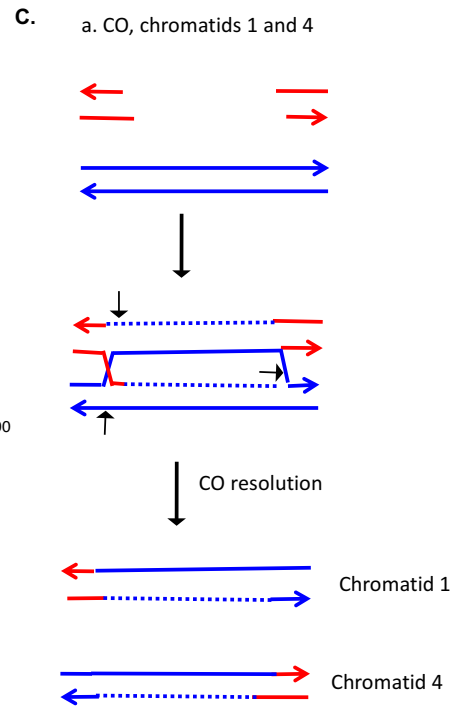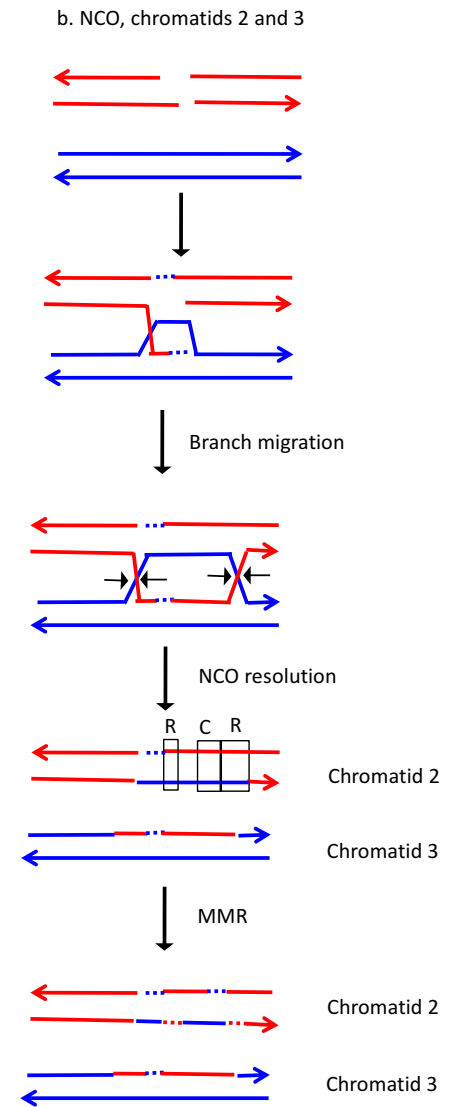

|     |     |                                                                                                           |                                                                                                                                    |
|-----|-----|-----------------------------------------------------------------------------------------------------------|------------------------------------------------------------------------------------------------------------------------------------|
| S90 | CO  | Very large conversion tract spanning DSB site; no heteroduplexes observed                                 | Repair of large double-stranded DNA gap, resolution of dHJ in CO mode                                                              |
|     | NCO | Heteroduplexes in both NCO chromatids 2 and 3 on same side of DSB site; homoduplex tracts in heteroduplex | Invasion of broken end, followed by branch migration; resolution of dHJ structure in NCO mode with regions of Mlh1-independent MMR |

S91

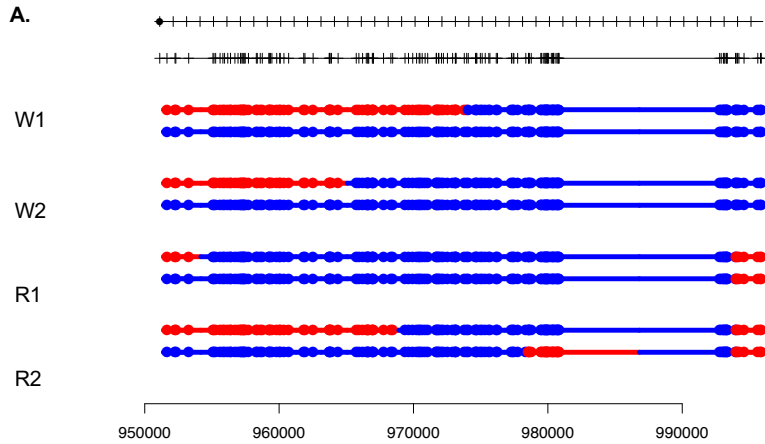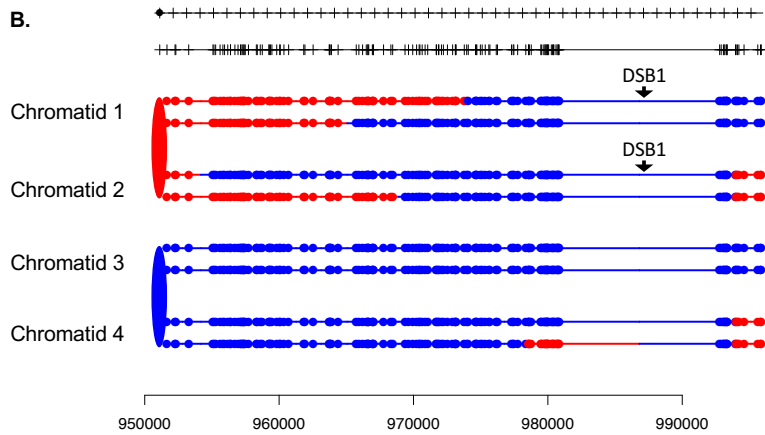

**C.** a. NCO, chromatids 2 and 3

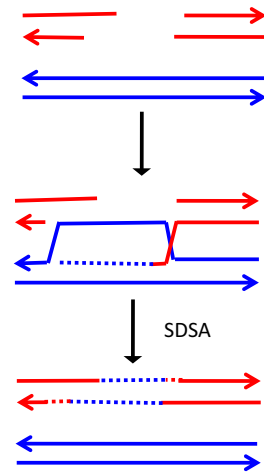

b. CO, chromatids 1 and 4

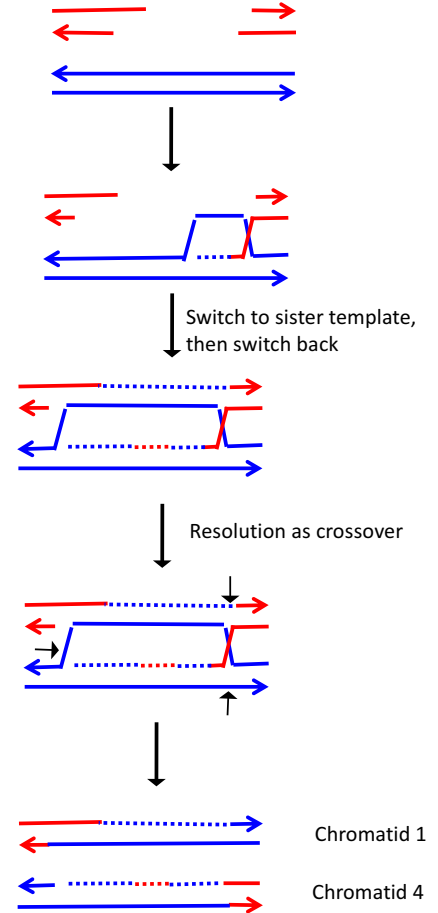

|     |     |                                                                                                                       |                                                                                                                                                                                 |
|-----|-----|-----------------------------------------------------------------------------------------------------------------------|---------------------------------------------------------------------------------------------------------------------------------------------------------------------------------|
| S91 | CO  | Heteroduplexes on both chromatids 1 and 4 on same side of putative DSB site; large conversion tract flanking DSB site | Invasion of right broken end, followed by synthesis off of homolog; template switch to sister chromatid, and then re-invasion of sister chromatid; resolution of dHJ in CO mode |
|     | NCO | Large conversion tract spanning putative DSB site                                                                     | Repair of large gap; SDSA                                                                                                                                                       |
